# Supplementary material
Source: publisher figshare collection journal article supplement (https://acs.figshare.com/ndownloader/files/8701918)
Supplement: Supplementary file 1 [file 8701918]

 
data_CrystalClear

_publ_contact_author_name	'Kazuaki Ishihara'
_publ_contact_author_address	'Nagoya University'
_publ_contact_author_email	'ishihara@cc.nagoya-u.ac.jp'
_publ_contact_author_fax	'+81-52-789-3222'
_publ_requested_journal		?
_publ_section_title		?
_publ_author_name	'Manabu Hatano; Kazuaki Ishihara'
_publ_author_address	'Nagoya University'
_publ_section_abstract		?
 
_audit_creation_method            SHELXL-2014/6
_chemical_name_systematic         ?
_chemical_name_common
;
(R)-BINSA-trimer potasium magnesium salt
;

_chemical_melting_point           ?
_chemical_formula_moiety          ?
_chemical_formula_sum
 'C120 H108 K3.50 Mg1.50 O21.50 S6' 
_chemical_formula_weight          2259.73

loop_
  _platon_squeeze_void_nr
  _platon_squeeze_void_average_x
  _platon_squeeze_void_average_y
  _platon_squeeze_void_average_z
  _platon_squeeze_void_volume
  _platon_squeeze_void_count_electrons
  _platon_squeeze_void_content
   1  0.004  0.612 -0.002      5511       607 ' '
_platon_squeeze_details                           ?

loop_
 _atom_type_symbol
 _atom_type_description
 _atom_type_scat_dispersion_real
 _atom_type_scat_dispersion_imag
 _atom_type_scat_source
 'C'  'C'   0.0033   0.0016
 'International Tables Vol C Tables 4.2.6.8 and 6.1.1.4'
 'H'  'H'   0.0000   0.0000
 'International Tables Vol C Tables 4.2.6.8 and 6.1.1.4'
 'O'  'O'   0.0106   0.0060
 'International Tables Vol C Tables 4.2.6.8 and 6.1.1.4'
 'Mg'  'Mg'   0.0486   0.0363
 'International Tables Vol C Tables 4.2.6.8 and 6.1.1.4'
 'S'  'S'   0.1246   0.1234
 'International Tables Vol C Tables 4.2.6.8 and 6.1.1.4'
 'K'  'K'   0.2009   0.2494
 'International Tables Vol C Tables 4.2.6.8 and 6.1.1.4'
 
_space_group_crystal_system       monoclinic
_space_group_IT_number            5
_space_group_name_H-M_alt         'C 2'
_space_group_name_Hall            'C 2y'
 
_shelx_space_group_comment
;
The symmetry employed for this shelxl refinement is uniquely defined
by the following loop, which should always be used as a source of
symmetry information in preference to the above space-group names.
They are only intended as comments.
;
 
loop_
 _space_group_symop_operation_xyz
 'x, y, z'
 '-x, y, -z'
 'x+1/2, y+1/2, z'
 '-x+1/2, y+1/2, -z'
 
_cell_length_a                    19.261(2)
_cell_length_b                    25.280(3)
_cell_length_c                    32.387(4)
_cell_angle_alpha                 90
_cell_angle_beta                  104.025(2)
_cell_angle_gamma                 90
_cell_volume                      15300(3)
_cell_formula_units_Z             4
_cell_measurement_temperature     123(2)
_cell_measurement_reflns_used     15349
_cell_measurement_theta_min       3.013
_cell_measurement_theta_max       27.486
 
_exptl_crystal_description        'prism'
_exptl_crystal_colour             'pale yellow'
_exptl_crystal_density_meas       ?
_exptl_crystal_density_method     ?
_exptl_crystal_density_diffrn     0.981          
_exptl_crystal_F_000              4722
_exptl_transmission_factor_min    0.854
_exptl_transmission_factor_max    1.000
_exptl_crystal_size_max           0.300
_exptl_crystal_size_mid           0.300
_exptl_crystal_size_min           0.200
_exptl_absorpt_coefficient_mu     0.242
_shelx_estimated_absorpt_T_min    0.931
_shelx_estimated_absorpt_T_max    0.953
_exptl_absorpt_correction_type    'empirical'
_exptl_absorpt_process_details    'Rigaku CrystalClear'
_exptl_absorpt_special_details    ?
_diffrn_ambient_temperature       123(2)
_diffrn_radiation_wavelength      0.71075
_diffrn_radiation_type            MoK\a
_diffrn_source                    ?
_diffrn_measurement_device_type   'PILATUS 200K area detector'
_diffrn_measurement_method        'phi and omega scan'
_diffrn_detector_area_resol_mean  ?
_diffrn_reflns_number             60588
_diffrn_reflns_av_unetI/netI      0.0542
_diffrn_reflns_av_R_equivalents   0.0365
_diffrn_reflns_limit_h_min        -24
_diffrn_reflns_limit_h_max        24
_diffrn_reflns_limit_k_min        -29
_diffrn_reflns_limit_k_max        32
_diffrn_reflns_limit_l_min        -41
_diffrn_reflns_limit_l_max        42
_diffrn_reflns_theta_min          3.013
_diffrn_reflns_theta_max          27.540
_diffrn_reflns_theta_full         25.242
_diffrn_measured_fraction_theta_max   0.979
_diffrn_measured_fraction_theta_full  0.987
_diffrn_reflns_Laue_measured_fraction_max    0.979
_diffrn_reflns_Laue_measured_fraction_full   0.987
_diffrn_reflns_point_group_measured_fraction_max   0.811
_diffrn_reflns_point_group_measured_fraction_full  0.852
_reflns_number_total              28622
_reflns_number_gt                 15869
_reflns_threshold_expression      'I > 2\s(I)'
_reflns_Friedel_coverage          0.620
_reflns_Friedel_fraction_max      0.636
_reflns_Friedel_fraction_full     0.709
 
_reflns_special_details
;
 Reflections were merged by SHELXL according to the crystal
 class for the calculation of statistics and refinement.
 
 _reflns_Friedel_fraction is defined as the number of unique
 Friedel pairs measured divided by the number that would be
 possible theoretically, ignoring centric projections and
 systematic absences.
;
 
_computing_data_collection        'Rigaku CrystalClear'
_computing_cell_refinement        'Rigaku CrystalClear'
_computing_data_reduction         'Rigaku CrystalClear'
_computing_structure_solution     'Rigaku CrystalStructure'
_computing_structure_refinement 'SHELXL-2014/6 (Sheldrick, 2014)'
_computing_molecular_graphics     'Rigaku CrystalStructure'
_computing_publication_material   'Rigaku CrystalStructure'
_refine_special_details           ?
_refine_ls_structure_factor_coef  Fsqd
_refine_ls_matrix_type            full
_refine_ls_weighting_scheme       calc
_refine_ls_weighting_details
'w=1/[\s^2^(Fo^2^)+(0.1000P)^2^] where P=(Fo^2^+2Fc^2^)/3'
_atom_sites_solution_primary      ?
_atom_sites_solution_secondary    ?
_atom_sites_solution_hydrogens    geom
_refine_ls_hydrogen_treatment     constr
_refine_ls_extinction_method      none
_refine_ls_extinction_coef        .
_refine_ls_abs_structure_details
;
 Flack x determined using 5668 quotients [(I+)-(I-)]/[(I+)+(I-)]
 (Parsons, Flack and Wagner, Acta Cryst. B69 (2013) 249-259).
;
_refine_ls_abs_structure_Flack    0.099(15)
_chemical_absolute_configuration  (R)
_refine_ls_number_reflns          28622
_refine_ls_number_parameters      1394
_refine_ls_number_restraints      1
_refine_ls_R_factor_all           0.1513
_refine_ls_R_factor_gt            0.1095
_refine_ls_wR_factor_ref          0.2849
_refine_ls_wR_factor_gt           0.2703
_refine_ls_goodness_of_fit_ref    1.637
_refine_ls_restrained_S_all       1.637
_refine_ls_shift/su_max           0.198
_refine_ls_shift/su_mean          0.060  
 
loop_
 _atom_site_label
 _atom_site_type_symbol
 _atom_site_fract_x
 _atom_site_fract_y
 _atom_site_fract_z
 _atom_site_U_iso_or_equiv
 _atom_site_adp_type
 _atom_site_occupancy
 _atom_site_site_symmetry_order  
 _atom_site_calc_flag
 _atom_site_refinement_flags_posn
 _atom_site_refinement_flags_adp
 _atom_site_refinement_flags_occupancy
 _atom_site_disorder_assembly
 _atom_site_disorder_group
C1 C 0.1256(5) 0.3798(4) -0.0939(3) 0.089(3) Uani 1 1 d . . . . .
C2 C 0.0536(5) 0.3710(4) -0.1096(2) 0.083(3) Uani 1 1 d . . . . .
C3 C 0.0050(6) 0.4131(4) -0.1253(3) 0.087(3) Uani 1 1 d . . . . .
C4 C 0.0339(7) 0.4606(4) -0.1285(4) 0.114(4) Uani 1 1 d . . . . .
H4 H 0.0025 0.4885 -0.1406 0.137 Uiso 1 1 calc R U . . .
C5 C 0.1396(9) 0.5232(6) -0.1192(5) 0.140(5) Uani 1 1 d . . . . .
H5 H 0.1092 0.5515 -0.1315 0.168 Uiso 1 1 calc R U . . .
C6 C 0.2071(10) 0.5333(6) -0.1074(5) 0.160(8) Uani 1 1 d . . . . .
H6 H 0.2252 0.5678 -0.1097 0.192 Uiso 1 1 calc R U . . .
C7 C 0.2479(9) 0.4952(9) -0.0926(4) 0.155(7) Uani 1 1 d . . . . .
H7 H 0.2976 0.5032 -0.0849 0.186 Uiso 1 1 calc R U . . .
C8 C 0.2296(7) 0.4420(6) -0.0858(3) 0.121(4) Uani 1 1 d . . . . .
H8 H 0.2647 0.4164 -0.0737 0.145 Uiso 1 1 calc R U . . .
C9 C 0.1542(7) 0.4291(5) -0.0987(3) 0.105(3) Uani 1 1 d . . . . .
C10 C 0.1052(8) 0.4720(4) -0.1157(4) 0.114(4) Uani 1 1 d . . . . .
C11 C -0.0718(5) 0.4100(4) -0.1421(3) 0.079(2) Uani 1 1 d . . . . .
C12 C -0.1200(6) 0.4050(5) -0.1159(3) 0.108(4) Uani 1 1 d . . . . .
H12 H -0.1022 0.4006 -0.0860 0.129 Uiso 1 1 calc R U . . .
C13 C -0.1925(6) 0.4064(6) -0.1330(4) 0.115(4) Uani 1 1 d . . . . .
H13 H -0.2230 0.4046 -0.1140 0.138 Uiso 1 1 calc R U . . .
C14 C -0.2227(6) 0.4100(5) -0.1743(4) 0.102(3) Uani 1 1 d . . . . .
C15 C -0.1740(7) 0.4176(5) -0.1994(3) 0.108(4) Uani 1 1 d . . . . .
H15 H -0.1921 0.4237 -0.2290 0.130 Uiso 1 1 calc R U . . .
C16 C -0.1011(5) 0.4167(4) -0.1832(3) 0.092(3) Uani 1 1 d . . . . .
H16 H -0.0708 0.4210 -0.2021 0.110 Uiso 1 1 calc R U . . .
C17 C -0.3024(7) 0.4139(5) -0.1950(5) 0.113(4) Uani 1 1 d . . . . .
C18 C -0.3436(10) 0.3871(10) -0.1699(7) 0.197(9) Uani 1 1 d . . . . .
H18 H -0.3317 0.3494 -0.1683 0.295 Uiso 1 1 calc R U . . .
H18A H -0.3947 0.3916 -0.1831 0.295 Uiso 1 1 calc R U . . .
H18B H -0.3326 0.4021 -0.1411 0.295 Uiso 1 1 calc R U . . .
C19 C -0.3255(6) 0.3906(8) -0.2390(5) 0.150(6) Uani 1 1 d . . . . .
H19 H -0.3246 0.3519 -0.2371 0.225 Uiso 1 1 calc R U . . .
H19A H -0.2927 0.4023 -0.2561 0.225 Uiso 1 1 calc R U . . .
H19B H -0.3741 0.4025 -0.2525 0.225 Uiso 1 1 calc R U . . .
C20 C -0.3264(8) 0.4673(7) -0.1936(8) 0.195(9) Uani 1 1 d . . . . .
H20 H -0.2964 0.4908 -0.2060 0.292 Uiso 1 1 calc R U . . .
H20A H -0.3229 0.4775 -0.1640 0.292 Uiso 1 1 calc R U . . .
H20B H -0.3762 0.4701 -0.2100 0.292 Uiso 1 1 calc R U . . .
C21 C 0.1808(5) 0.3368(4) -0.0780(3) 0.089(3) Uani 1 1 d . . . . .
C22 C 0.2042(4) 0.3243(4) -0.0356(3) 0.082(3) Uani 1 1 d . . . . .
C23 C 0.2614(5) 0.2858(5) -0.0209(3) 0.090(3) Uani 1 1 d . . . . .
C24 C 0.2876(6) 0.2603(5) -0.0505(4) 0.103(3) Uani 1 1 d . . . . .
H24 H 0.3230 0.2338 -0.0417 0.123 Uiso 1 1 calc R U . . .
C25 C 0.2943(10) 0.2476(8) -0.1257(5) 0.169(7) Uani 1 1 d . . . . .
H25 H 0.3337 0.2244 -0.1161 0.203 Uiso 1 1 calc R U . . .
C26 C 0.2686(10) 0.2564(9) -0.1691(7) 0.171(7) Uani 1 1 d . . . . .
H26 H 0.2869 0.2363 -0.1889 0.205 Uiso 1 1 calc R U . . .
C27 C 0.2169(10) 0.2941(7) -0.1834(5) 0.148(6) Uani 1 1 d . . . . .
H27 H 0.2013 0.3013 -0.2130 0.177 Uiso 1 1 calc R U . . .
C28 C 0.1868(8) 0.3224(7) -0.1540(4) 0.134(5) Uani 1 1 d . . . . .
H28 H 0.1513 0.3487 -0.1635 0.161 Uiso 1 1 calc R U . . .
C29 C 0.2118(7) 0.3102(5) -0.1087(3) 0.105(3) Uani 1 1 d . . . . .
C30 C 0.2625(8) 0.2726(6) -0.0955(5) 0.123(4) Uani 1 1 d . . . . .
C31 C 0.2938(4) 0.2709(5) 0.0232(3) 0.095(3) Uani 1 1 d . . . . .
C32 C 0.3469(6) 0.2970(5) 0.0491(5) 0.118(4) Uani 1 1 d . . . . .
H32 H 0.3620 0.3296 0.0397 0.142 Uiso 1 1 calc R U . . .
C33 C 0.3830(6) 0.2778(6) 0.0913(4) 0.119(4) Uani 1 1 d . . . . .
H33 H 0.4180 0.2992 0.1095 0.143 Uiso 1 1 calc R U . . .
C34 C 0.3670(5) 0.2295(5) 0.1047(4) 0.105(4) Uani 1 1 d . . . . .
C35 C 0.3120(9) 0.2024(8) 0.0785(6) 0.167(7) Uani 1 1 d . . . . .
H35 H 0.2988 0.1690 0.0878 0.200 Uiso 1 1 calc R U . . .
C36 C 0.2744(6) 0.2215(6) 0.0388(4) 0.144(6) Uani 1 1 d . . . . .
H36 H 0.2359 0.2015 0.0222 0.173 Uiso 1 1 calc R U . . .
C37 C 0.4077(6) 0.2060(7) 0.1474(4) 0.131(5) Uani 1 1 d . . . . .
C38 C 0.3620(10) 0.1686(5) 0.1640(4) 0.140(5) Uani 1 1 d . . . . .
H38 H 0.3580 0.1353 0.1481 0.209 Uiso 1 1 calc R U . . .
H38A H 0.3143 0.1839 0.1609 0.209 Uiso 1 1 calc R U . . .
H38B H 0.3835 0.1616 0.1942 0.209 Uiso 1 1 calc R U . . .
C39 C 0.4261(15) 0.2487(8) 0.1830(6) 0.216(11) Uani 1 1 d . . . . .
H39 H 0.4514 0.2781 0.1734 0.325 Uiso 1 1 calc R U . . .
H39A H 0.4567 0.2330 0.2087 0.325 Uiso 1 1 calc R U . . .
H39B H 0.3819 0.2617 0.1893 0.325 Uiso 1 1 calc R U . . .
C40 C 0.4748(13) 0.186(2) 0.1414(10) 0.40(3) Uani 1 1 d . . . . .
H40 H 0.4993 0.2133 0.1291 0.602 Uiso 1 1 calc R U . . .
H40A H 0.4655 0.1552 0.1220 0.602 Uiso 1 1 calc R U . . .
H40B H 0.5051 0.1745 0.1689 0.602 Uiso 1 1 calc R U . . .
S1 S 0.01505(15) 0.30719(13) -0.10709(12) 0.1138(11) Uani 1 1 d . . . . .
O1 O -0.0120(6) 0.3138(6) -0.0663(3) 0.177(5) Uani 1 1 d . . . . .
O2 O -0.0398(4) 0.3011(3) -0.1431(3) 0.119(2) Uani 1 1 d . . . . .
O3 O 0.0705(4) 0.2708(3) -0.1016(4) 0.171(5) Uani 1 1 d . . . . .
S2 S 0.16626(12) 0.35318(13) 0.00387(7) 0.0908(8) Uani 1 1 d . . . . .
O4 O 0.1198(6) 0.3173(5) 0.0124(3) 0.162(4) Uani 1 1 d . . . . .
O5 O 0.1209(7) 0.3922(6) -0.0142(3) 0.230(8) Uani 1 1 d . . . . .
O6 O 0.2211(4) 0.3624(4) 0.0412(3) 0.144(3) Uani 1 1 d . . . . .
Mg1 Mg 0.0000 0.3239(2) 0.0000 0.1121(16) Uani 1 2 d S T P . .
O7 O 0.0000 0.4116(5) 0.0000 0.136(4) Uani 1 2 d S T P . .
O8 O 0.0000 0.2439(5) 0.0000 0.39(2) Uani 1 2 d S T P . .
K1 K 0.1140(5) 0.1871(3) -0.0657(4) 0.322(5) Uani 1 1 d . . . . .
K2 K 0.15716(16) 0.27174(17) 0.09554(8) 0.1464(13) Uani 1 1 d . . . . .
S3 S 0.10912(14) 0.13754(8) 0.04222(6) 0.0758(6) Uani 1 1 d . . . . .
O9 O 0.0868(7) 0.1892(3) 0.0535(3) 0.165(4) Uani 1 1 d . . . . .
O10 O 0.1023(5) 0.1353(4) -0.0025(2) 0.134(3) Uani 1 1 d . . . . .
O11 O 0.1768(4) 0.1259(4) 0.0684(3) 0.137(4) Uani 1 1 d . . . . .
C41 C -0.0013(4) 0.0625(3) 0.0236(2) 0.0583(18) Uani 1 1 d . . . . .
C42 C 0.0458(4) 0.0916(3) 0.0547(2) 0.065(2) Uani 1 1 d . . . . .
C43 C 0.0464(5) 0.0860(3) 0.0984(2) 0.073(2) Uani 1 1 d . . . . .
C44 C 0.0018(6) 0.0503(4) 0.1095(3) 0.105(4) Uani 1 1 d . . . . .
H44 H 0.0031 0.0453 0.1388 0.127 Uiso 1 1 calc R U . . .
C45 C -0.0931(11) -0.0160(9) 0.0905(4) 0.222(12) Uani 1 1 d . . . . .
H45 H -0.0926 -0.0202 0.1197 0.266 Uiso 1 1 calc R U . . .
C46 C -0.1367(13) -0.0442(11) 0.0620(4) 0.246(14) Uani 1 1 d . . . . .
H46 H -0.1666 -0.0693 0.0711 0.295 Uiso 1 1 calc R U . . .
C47 C -0.1415(8) -0.0390(5) 0.0181(3) 0.141(6) Uani 1 1 d . . . . .
H47 H -0.1758 -0.0583 -0.0025 0.170 Uiso 1 1 calc R U . . .
C48 C -0.0961(7) -0.0061(4) 0.0069(3) 0.105(4) Uani 1 1 d . . . . .
H48 H -0.0952 -0.0045 -0.0223 0.126 Uiso 1 1 calc R U . . .
C49 C -0.0490(6) 0.0265(4) 0.0358(3) 0.089(3) Uani 1 1 d . . . . .
C50 C -0.0468(8) 0.0204(6) 0.0784(3) 0.138(6) Uani 1 1 d . . . . .
C51 C 0.0967(6) 0.1166(3) 0.1354(2) 0.076(2) Uani 1 1 d . . . . .
C52 C 0.1539(5) 0.0927(3) 0.1601(3) 0.074(2) Uani 1 1 d . . . . .
H52 H 0.1674 0.0585 0.1527 0.088 Uiso 1 1 calc R U . . .
C53 C 0.1925(4) 0.1168(4) 0.1954(3) 0.074(2) Uani 1 1 d . . . . .
H53 H 0.2334 0.0991 0.2118 0.089 Uiso 1 1 calc R U . . .
C54 C 0.1755(5) 0.1658(3) 0.2088(2) 0.070(2) Uani 1 1 d . . . . .
C55 C 0.1163(6) 0.1903(4) 0.1830(3) 0.095(3) Uani 1 1 d . . . . .
H55 H 0.1020 0.2240 0.1908 0.114 Uiso 1 1 calc R U . . .
C56 C 0.0769(6) 0.1664(3) 0.1456(3) 0.083(3) Uani 1 1 d . . . . .
H56 H 0.0374 0.1842 0.1277 0.100 Uiso 1 1 calc R U . . .
C57 C 0.2165(6) 0.1942(4) 0.2501(3) 0.089(3) Uani 1 1 d . . . . .
C58 C 0.1645(6) 0.2035(4) 0.2794(3) 0.093(3) Uani 1 1 d . . . . .
H58 H 0.1162 0.2102 0.2619 0.140 Uiso 1 1 calc R U . . .
H58A H 0.1806 0.2342 0.2978 0.140 Uiso 1 1 calc R U . . .
H58B H 0.1639 0.1721 0.2971 0.140 Uiso 1 1 calc R U . . .
C59 C 0.2439(8) 0.2483(6) 0.2387(5) 0.156(7) Uani 1 1 d . . . . .
H59 H 0.2657 0.2441 0.2145 0.233 Uiso 1 1 calc R U . . .
H59A H 0.2797 0.2620 0.2632 0.233 Uiso 1 1 calc R U . . .
H59B H 0.2038 0.2732 0.2311 0.233 Uiso 1 1 calc R U . . .
C60 C 0.2799(7) 0.1646(9) 0.2733(5) 0.204(11) Uani 1 1 d . . . . .
H60 H 0.3108 0.1569 0.2540 0.306 Uiso 1 1 calc R U . . .
H60A H 0.2647 0.1315 0.2840 0.306 Uiso 1 1 calc R U . . .
H60B H 0.3065 0.1859 0.2972 0.306 Uiso 1 1 calc R U . . .
C61 C 0.3120(4) 0.3133(3) 0.4020(2) 0.0604(18) Uani 1 1 d . . . . .
C62 C 0.3752(4) 0.3228(3) 0.3883(2) 0.0585(18) Uani 1 1 d . . . . .
C63 C 0.4130(4) 0.2810(3) 0.3763(2) 0.063(2) Uani 1 1 d . . . . .
C64 C 0.3888(5) 0.2302(3) 0.3805(3) 0.071(2) Uani 1 1 d . . . . .
H64 H 0.4162 0.2015 0.3740 0.086 Uiso 1 1 calc R U . . .
C65 C 0.3030(6) 0.1661(4) 0.3964(3) 0.097(3) Uani 1 1 d . . . . .
H65 H 0.3308 0.1374 0.3904 0.116 Uiso 1 1 calc R U . . .
C66 C 0.2404(6) 0.1565(4) 0.4075(3) 0.090(3) Uani 1 1 d . . . . .
H66 H 0.2252 0.1210 0.4094 0.108 Uiso 1 1 calc R U . . .
C67 C 0.2000(5) 0.1965(4) 0.4159(3) 0.075(2) Uani 1 1 d . . . . .
H67 H 0.1553 0.1888 0.4222 0.089 Uiso 1 1 calc R U . . .
C68 C 0.2217(4) 0.2486(4) 0.4158(2) 0.072(2) Uani 1 1 d . . . . .
H68 H 0.1939 0.2763 0.4234 0.087 Uiso 1 1 calc R U . . .
C69 C 0.2867(4) 0.2600(3) 0.4039(2) 0.0596(18) Uani 1 1 d . . . . .
C70 C 0.3269(4) 0.2185(3) 0.3936(2) 0.0610(19) Uani 1 1 d . . . . .
C71 C 0.4763(4) 0.2850(3) 0.3578(3) 0.069(2) Uani 1 1 d . . . . .
C72 C 0.5450(6) 0.2771(8) 0.3811(5) 0.171(8) Uani 1 1 d . . . . .
H72 H 0.5550 0.2734 0.4111 0.205 Uiso 1 1 calc R U . . .
C73 C 0.6014(6) 0.2746(9) 0.3595(5) 0.185(9) Uani 1 1 d . . . . .
H73 H 0.6482 0.2659 0.3755 0.222 Uiso 1 1 calc R U . . .
C74 C 0.5910(6) 0.2843(4) 0.3160(4) 0.101(3) Uani 1 1 d . . . . .
C75 C 0.5253(6) 0.2943(5) 0.2950(3) 0.094(3) Uani 1 1 d . . . . .
H75 H 0.5163 0.3007 0.2653 0.113 Uiso 1 1 calc R U . . .
C76 C 0.4661(5) 0.2959(4) 0.3148(3) 0.085(3) Uani 1 1 d . . . . .
H76 H 0.4196 0.3046 0.2983 0.102 Uiso 1 1 calc R U . . .
C77 C 0.6510(7) 0.2799(7) 0.2936(6) 0.140(6) Uani 1 1 d . . . . .
C78 C 0.7117(10) 0.3225(9) 0.3188(7) 0.192(9) Uani 1 1 d . . . . .
H78 H 0.7213 0.3162 0.3496 0.289 Uiso 1 1 calc R U . . .
H78A H 0.6938 0.3586 0.3125 0.289 Uiso 1 1 calc R U . . .
H78B H 0.7560 0.3180 0.3094 0.289 Uiso 1 1 calc R U . . .
C79 C 0.6842(11) 0.2290(7) 0.3007(10) 0.253(15) Uani 1 1 d . . . . .
H79 H 0.6960 0.2211 0.3312 0.380 Uiso 1 1 calc R U . . .
H79A H 0.7280 0.2290 0.2904 0.380 Uiso 1 1 calc R U . . .
H79B H 0.6512 0.2021 0.2854 0.380 Uiso 1 1 calc R U . . .
C80 C 0.6328(11) 0.3045(9) 0.2517(9) 0.224(11) Uani 1 1 d . . . . .
H80 H 0.6764 0.3091 0.2415 0.336 Uiso 1 1 calc R U . . .
H80A H 0.6109 0.3391 0.2536 0.336 Uiso 1 1 calc R U . . .
H80B H 0.5990 0.2820 0.2318 0.336 Uiso 1 1 calc R U . . .
C81 C 0.2603(4) 0.3555(3) 0.4085(3) 0.068(2) Uani 1 1 d . . . . .
C82 C 0.2585(4) 0.3763(3) 0.4482(3) 0.065(2) Uani 1 1 d . . . . .
C83 C 0.1987(5) 0.4109(3) 0.4517(3) 0.075(2) Uani 1 1 d . . . . .
C84 C 0.1545(5) 0.4251(4) 0.4171(5) 0.099(3) Uani 1 1 d . . . . .
H84 H 0.1209 0.4518 0.4194 0.119 Uiso 1 1 calc R U . . .
C85 C 0.0979(7) 0.4205(5) 0.3386(5) 0.129(5) Uani 1 1 d . . . . .
H85 H 0.0630 0.4461 0.3410 0.155 Uiso 1 1 calc R U . . .
C86 C 0.0976(7) 0.3975(7) 0.2983(5) 0.137(5) Uani 1 1 d . . . . .
H86 H 0.0614 0.4060 0.2736 0.164 Uiso 1 1 calc R U . . .
C87 C 0.1514(6) 0.3628(5) 0.2966(4) 0.103(3) Uani 1 1 d . . . . .
H87 H 0.1511 0.3475 0.2697 0.123 Uiso 1 1 calc R U . . .
C88 C 0.2047(4) 0.3488(4) 0.3300(3) 0.077(2) Uani 1 1 d . . . . .
H88 H 0.2407 0.3248 0.3262 0.093 Uiso 1 1 calc R U . . .
C89 C 0.2071(4) 0.3697(3) 0.3707(3) 0.075(2) Uani 1 1 d . . . . .
C90 C 0.1508(5) 0.4045(4) 0.3750(4) 0.092(3) Uani 1 1 d . . . . .
C91 C 0.1859(5) 0.4300(4) 0.4925(4) 0.091(3) Uani 1 1 d . . . . .
C92 C 0.1417(12) 0.4034(6) 0.5102(6) 0.199(10) Uani 1 1 d . . . . .
H92 H 0.1258 0.3696 0.4991 0.239 Uiso 1 1 calc R U . . .
C93 C 0.1164(9) 0.4233(6) 0.5457(5) 0.155(6) Uani 1 1 d . . . . .
H93 H 0.0820 0.4044 0.5565 0.186 Uiso 1 1 calc R U . . .
C94 C 0.1444(7) 0.4711(5) 0.5635(5) 0.146(6) Uani 1 1 d . . . . .
C95 C 0.1907(8) 0.4936(6) 0.5452(6) 0.161(7) Uani 1 1 d . . . . .
H95 H 0.2120 0.5254 0.5579 0.193 Uiso 1 1 calc R U . . .
C96 C 0.2122(6) 0.4767(4) 0.5095(4) 0.108(4) Uani 1 1 d . . . . .
H96 H 0.2440 0.4970 0.4976 0.129 Uiso 1 1 calc R U . . .
C97 C 0.1183(8) 0.4919(10) 0.6009(7) 0.204(11) Uani 1 1 d . . . . .
C98 C 0.1761(10) 0.5197(8) 0.6330(6) 0.174(7) Uani 1 1 d . . . . .
H98 H 0.1580 0.5294 0.6578 0.262 Uiso 1 1 calc R U . . .
H98A H 0.1904 0.5518 0.6202 0.262 Uiso 1 1 calc R U . . .
H98B H 0.2175 0.4962 0.6419 0.262 Uiso 1 1 calc R U . . .
C99 C 0.0814(17) 0.4582(10) 0.6213(8) 0.246(15) Uani 1 1 d . . . . .
H99 H 0.0412 0.4772 0.6281 0.368 Uiso 1 1 calc R U . . .
H99A H 0.1135 0.4452 0.6476 0.368 Uiso 1 1 calc R U . . .
H99B H 0.0631 0.4282 0.6027 0.368 Uiso 1 1 calc R U . . .
C100 C 0.0493(18) 0.520(2) 0.5837(9) 0.38(3) Uani 1 1 d . . . . .
H100 H 0.0109 0.5030 0.5937 0.576 Uiso 1 1 calc R U . . .
H101 H 0.0378 0.5196 0.5525 0.576 Uiso 1 1 calc R U . . .
H102 H 0.0539 0.5571 0.5935 0.576 Uiso 1 1 calc R U . . .
S4 S 0.40892(12) 0.38852(9) 0.38574(7) 0.0761(6) Uani 1 1 d . . . . .
O12 O 0.3755(7) 0.4208(3) 0.4099(4) 0.168(5) Uani 1 1 d . . . . .
O13 O 0.4830(5) 0.3857(4) 0.4063(5) 0.176(4) Uani 1 1 d . . . . .
O14 O 0.4044(8) 0.4012(4) 0.3449(3) 0.193(6) Uani 1 1 d . . . . .
S5 S 0.32416(11) 0.36021(9) 0.49496(7) 0.0722(6) Uani 1 1 d . . . . .
O15 O 0.3585(4) 0.4131(3) 0.5069(2) 0.0961(19) Uani 1 1 d . . . . .
O16 O 0.3726(3) 0.3254(2) 0.48350(17) 0.0773(16) Uani 1 1 d . . . . .
O17 O 0.2869(4) 0.3429(3) 0.5248(2) 0.106(2) Uani 1 1 d . . . . .
Mg2 Mg 0.4245(3) 0.4612(2) 0.47364(18) 0.1525(18) Uani 1 1 d . . . . .
O18 O 0.5000 0.4187(4) 0.5000 0.097(3) Uani 1 2 d S T P . .
O19 O 0.3353(3) 0.5046(2) 0.43937(18) 0.0798(16) Uani 1 1 d . . . . .
K3 K 0.5000 0.2901(3) 0.5000 0.284(6) Uani 1 2 d S T P . .
K4 K 0.40379(15) 0.44663(12) 0.59006(8) 0.1152(8) Uani 1 1 d . . . . .
O20 O 0.2872(10) 0.3926(6) 0.5994(5) 0.248(9) Uani 1 1 d . . . . .
S6 S 0.4239(5) 0.55775(15) 0.53480(10) 0.207(3) Uani 1 1 d . . . . .
O21 O 0.3802(5) 0.5583(3) 0.5598(4) 0.149(4) Uani 1 1 d . . . . .
O22 O 0.4628(11) 0.5085(3) 0.5361(5) 0.292(11) Uani 1 1 d . . . . .
O23 O 0.3923(15) 0.5675(6) 0.4929(3) 0.393(19) Uani 1 1 d . . . . .
C101 C 0.5147(10) 0.6380(4) 0.5248(3) 0.143(6) Uani 1 1 d . . . . .
C102 C 0.4849(11) 0.6074(4) 0.5523(3) 0.152(7) Uani 1 1 d . . . . .
C103 C 0.5197(9) 0.6126(4) 0.5977(3) 0.119(5) Uani 1 1 d . . . . .
C104 C 0.5696(9) 0.6506(5) 0.6102(4) 0.126(4) Uani 1 1 d . . . . .
H104 H 0.5879 0.6566 0.6398 0.151 Uiso 1 1 calc R U . . .
C105 C 0.6516(10) 0.7259(7) 0.5982(5) 0.150(5) Uani 1 1 d . . . . .
H105 H 0.6687 0.7321 0.6279 0.180 Uiso 1 1 calc R U . . .
C106 C 0.6751(10) 0.7552(7) 0.5691(7) 0.160(6) Uani 1 1 d . . . . .
H106 H 0.7099 0.7820 0.5786 0.192 Uiso 1 1 calc R U . . .
C107 C 0.6481(11) 0.7465(6) 0.5247(6) 0.142(6) Uani 1 1 d . . . . .
H107 H 0.6670 0.7671 0.5055 0.170 Uiso 1 1 calc R U . . .
C108 C 0.5973(10) 0.7105(5) 0.5085(5) 0.138(5) Uani 1 1 d . . . . .
H108 H 0.5791 0.7071 0.4786 0.166 Uiso 1 1 calc R U . . .
C109 C 0.5704(11) 0.6761(4) 0.5385(4) 0.147(6) Uani 1 1 d . . . . .
C110 C 0.5958(10) 0.6819(5) 0.5810(4) 0.131(5) Uani 1 1 d . . . . .
C111 C 0.4957(7) 0.5824(4) 0.6300(3) 0.099(3) Uani 1 1 d . . . . .
C112 C 0.4477(7) 0.6023(5) 0.6519(4) 0.113(4) Uani 1 1 d . . . . .
H112 H 0.4267 0.6361 0.6445 0.135 Uiso 1 1 calc R U . . .
C113 C 0.4301(7) 0.5734(5) 0.6844(4) 0.115(4) Uani 1 1 d . . . . .
H113 H 0.3995 0.5891 0.6999 0.137 Uiso 1 1 calc R U . . .
C114 C 0.4552(5) 0.5233(4) 0.6950(3) 0.075(2) Uani 1 1 d . . . . .
C115 C 0.5042(6) 0.5053(4) 0.6749(3) 0.091(3) Uani 1 1 d . . . . .
H115 H 0.5243 0.4714 0.6826 0.109 Uiso 1 1 calc R U . . .
C116 C 0.5267(8) 0.5329(4) 0.6442(3) 0.115(4) Uani 1 1 d . . . . .
H116 H 0.5633 0.5187 0.6323 0.138 Uiso 1 1 calc R U . . .
C117 C 0.4292(5) 0.4926(5) 0.7292(3) 0.088(3) Uani 1 1 d . . . . .
C118 C 0.3559(12) 0.4906(10) 0.7215(8) 0.213(10) Uani 1 1 d . . . . .
H118 H 0.3391 0.4553 0.7110 0.319 Uiso 1 1 calc R U . . .
H119 H 0.3348 0.5172 0.7001 0.319 Uiso 1 1 calc R U . . .
H120 H 0.3413 0.4978 0.7479 0.319 Uiso 1 1 calc R U . . .
C119 C 0.4623(9) 0.4358(8) 0.7351(5) 0.170(7) Uani 1 1 d . . . . .
H121 H 0.4405 0.4141 0.7102 0.255 Uiso 1 1 calc R U . . .
H122 H 0.4532 0.4197 0.7607 0.255 Uiso 1 1 calc R U . . .
H123 H 0.5141 0.4381 0.7378 0.255 Uiso 1 1 calc R U . . .
C120 C 0.4567(15) 0.5203(8) 0.7721(4) 0.208(11) Uani 1 1 d . . . . .
H124 H 0.4307 0.5536 0.7722 0.313 Uiso 1 1 calc R U . . .
H125 H 0.5079 0.5276 0.7765 0.313 Uiso 1 1 calc R U . . .
H126 H 0.4489 0.4974 0.7950 0.313 Uiso 1 1 calc R U . . .
 
loop_
 _atom_site_aniso_label
 _atom_site_aniso_U_11
 _atom_site_aniso_U_22
 _atom_site_aniso_U_33
 _atom_site_aniso_U_23
 _atom_site_aniso_U_13
 _atom_site_aniso_U_12
C1 0.093(7) 0.106(8) 0.066(5) 0.024(5) 0.015(5) -0.043(6)
C2 0.089(6) 0.110(7) 0.050(4) 0.030(4) 0.017(4) -0.009(6)
C3 0.123(8) 0.091(7) 0.046(4) 0.006(4) 0.019(5) -0.008(6)
C4 0.131(9) 0.076(7) 0.106(8) 0.004(6) -0.025(7) -0.036(7)
C5 0.143(12) 0.117(11) 0.129(11) 0.001(8) -0.032(9) 0.006(9)
C6 0.164(14) 0.117(11) 0.143(12) 0.057(9) -0.069(11) -0.057(10)
C7 0.138(11) 0.230(19) 0.078(8) 0.023(9) -0.012(8) -0.107(13)
C8 0.128(9) 0.148(11) 0.075(6) 0.018(6) 0.004(6) -0.078(8)
C9 0.135(9) 0.113(9) 0.057(6) 0.015(5) 0.006(6) -0.007(8)
C10 0.161(11) 0.057(6) 0.101(8) 0.015(5) -0.010(8) -0.037(7)
C11 0.079(6) 0.096(6) 0.058(5) -0.011(4) 0.009(5) 0.001(5)
C12 0.113(8) 0.166(11) 0.040(5) -0.003(5) 0.011(5) 0.007(8)
C13 0.088(7) 0.190(13) 0.068(7) -0.030(7) 0.021(6) -0.005(7)
C14 0.102(7) 0.104(8) 0.101(8) -0.035(6) 0.029(7) 0.011(6)
C15 0.140(10) 0.113(8) 0.073(6) -0.012(5) 0.028(7) 0.017(7)
C16 0.072(6) 0.117(8) 0.078(7) 0.007(5) 0.001(5) -0.004(6)
C17 0.088(8) 0.104(9) 0.143(11) -0.016(7) 0.020(8) 0.014(7)
C18 0.146(13) 0.25(2) 0.190(18) -0.098(17) 0.023(13) 0.001(16)
C19 0.084(7) 0.223(17) 0.127(10) -0.040(11) -0.005(7) 0.012(9)
C20 0.112(10) 0.132(14) 0.32(3) -0.036(14) 0.008(13) 0.031(10)
C21 0.078(5) 0.121(8) 0.067(6) 0.032(5) 0.018(5) -0.034(6)
C22 0.049(4) 0.110(7) 0.089(6) 0.033(5) 0.019(4) -0.003(5)
C23 0.074(6) 0.124(8) 0.083(6) 0.005(6) 0.037(5) -0.041(6)
C24 0.097(7) 0.116(8) 0.096(8) 0.037(6) 0.024(6) 0.003(6)
C25 0.189(15) 0.237(19) 0.112(11) 0.054(11) 0.093(11) 0.069(14)
C26 0.145(13) 0.197(19) 0.20(2) -0.024(15) 0.102(13) -0.022(13)
C27 0.177(14) 0.179(14) 0.125(10) 0.033(10) 0.109(11) 0.026(12)
C28 0.149(10) 0.184(13) 0.086(8) -0.010(8) 0.059(8) -0.017(10)
C29 0.124(9) 0.119(9) 0.083(7) 0.028(6) 0.047(7) -0.014(8)
C30 0.120(9) 0.122(10) 0.137(11) -0.006(9) 0.053(9) -0.027(9)
C31 0.054(5) 0.120(8) 0.105(7) 0.040(6) 0.003(5) -0.036(5)
C32 0.096(7) 0.099(8) 0.159(11) 0.026(7) 0.032(8) -0.034(7)
C33 0.091(7) 0.137(10) 0.107(8) 0.047(8) -0.020(6) -0.014(7)
C34 0.058(5) 0.134(10) 0.114(8) 0.041(7) 0.003(6) -0.017(6)
C35 0.132(11) 0.181(15) 0.163(14) 0.082(12) -0.012(11) -0.015(11)
C36 0.093(7) 0.198(14) 0.115(9) 0.078(9) -0.026(7) -0.086(9)
C37 0.088(7) 0.176(13) 0.114(10) 0.063(10) -0.005(7) 0.017(8)
C38 0.212(15) 0.100(9) 0.099(9) 0.009(7) 0.021(10) 0.014(10)
C39 0.31(3) 0.175(16) 0.122(12) 0.008(11) -0.039(15) -0.069(18)
C40 0.181(19) 0.75(8) 0.29(3) 0.36(5) 0.08(2) 0.23(3)
S1 0.0774(16) 0.121(2) 0.142(3) 0.064(2) 0.0242(18) -0.0178(17)
O1 0.162(8) 0.265(13) 0.110(6) 0.055(7) 0.042(6) -0.068(9)
O2 0.118(5) 0.081(5) 0.139(6) 0.009(4) -0.006(5) -0.011(4)
O3 0.079(5) 0.096(6) 0.318(14) 0.099(7) 0.008(6) -0.005(5)
S2 0.0603(12) 0.150(2) 0.0623(13) 0.0236(14) 0.0161(11) -0.0111(15)
O4 0.181(8) 0.222(11) 0.112(6) -0.036(6) 0.095(6) -0.078(8)
O5 0.252(12) 0.383(19) 0.077(5) 0.099(8) 0.086(7) 0.226(14)
O6 0.079(4) 0.209(10) 0.127(7) -0.061(6) -0.004(4) 0.007(5)
Mg1 0.120(4) 0.091(4) 0.121(4) 0.000 0.019(3) 0.000
O7 0.104(7) 0.101(8) 0.205(13) 0.000 0.040(8) 0.000
O8 0.49(3) 0.110(10) 0.31(2) 0.000 -0.39(3) 0.000
K1 0.330(10) 0.233(7) 0.394(12) 0.113(7) 0.071(9) 0.019(7)
K2 0.1150(19) 0.243(4) 0.0641(14) -0.0060(18) -0.0122(13) -0.009(2)
S3 0.1166(18) 0.0511(11) 0.0567(12) 0.0058(9) 0.0152(12) -0.0142(12)
O9 0.307(13) 0.037(4) 0.190(9) 0.022(4) 0.138(9) 0.003(5)
O10 0.193(8) 0.153(7) 0.058(4) -0.028(4) 0.035(5) -0.083(7)
O11 0.095(5) 0.176(8) 0.112(5) 0.071(5) -0.030(4) -0.046(5)
C41 0.078(5) 0.050(4) 0.041(4) 0.011(3) 0.001(4) 0.002(4)
C42 0.088(5) 0.055(4) 0.049(4) 0.011(3) 0.015(4) 0.011(4)
C43 0.108(6) 0.068(5) 0.033(4) 0.010(3) -0.004(4) -0.016(5)
C44 0.139(9) 0.117(8) 0.048(5) 0.011(5) -0.002(5) -0.067(7)
C45 0.29(2) 0.31(2) 0.062(7) 0.001(9) 0.026(10) -0.24(2)
C46 0.28(2) 0.36(3) 0.066(8) 0.023(11) -0.006(11) -0.24(2)
C47 0.185(12) 0.139(10) 0.077(7) -0.008(6) -0.015(8) -0.115(10)
C48 0.159(10) 0.082(6) 0.056(5) 0.003(4) -0.009(6) -0.057(7)
C49 0.114(7) 0.095(7) 0.048(5) -0.004(4) 0.000(5) -0.027(6)
C50 0.179(12) 0.167(11) 0.045(5) 0.027(6) -0.016(6) -0.097(10)
C51 0.117(7) 0.063(5) 0.047(4) 0.003(4) 0.017(5) -0.018(5)
C52 0.089(6) 0.054(5) 0.069(5) -0.019(4) 0.002(5) 0.005(5)
C53 0.065(5) 0.083(6) 0.073(5) -0.024(4) 0.014(4) 0.019(4)
C54 0.090(6) 0.060(5) 0.055(4) -0.008(4) 0.011(4) -0.015(5)
C55 0.132(8) 0.070(6) 0.072(6) -0.019(5) 0.002(6) 0.006(6)
C56 0.115(7) 0.053(5) 0.069(5) 0.000(4) -0.003(5) 0.010(5)
C57 0.116(8) 0.083(6) 0.063(5) -0.032(5) 0.013(5) -0.021(6)
C58 0.118(7) 0.097(7) 0.069(6) -0.022(5) 0.031(5) -0.037(6)
C59 0.173(12) 0.172(14) 0.145(11) -0.099(10) 0.084(10) -0.116(11)
C60 0.103(9) 0.34(3) 0.134(12) -0.144(15) -0.038(9) 0.062(13)
C61 0.065(4) 0.053(4) 0.065(4) -0.003(3) 0.019(4) 0.016(4)
C62 0.057(4) 0.067(5) 0.052(4) -0.008(3) 0.015(3) -0.007(4)
C63 0.074(5) 0.075(6) 0.040(4) -0.015(3) 0.010(3) 0.010(4)
C64 0.089(6) 0.062(5) 0.072(5) -0.016(4) 0.037(4) 0.019(5)
C65 0.131(9) 0.069(6) 0.104(7) 0.001(5) 0.058(7) 0.006(6)
C66 0.114(7) 0.070(6) 0.102(7) -0.011(5) 0.058(6) -0.020(6)
C67 0.080(5) 0.070(6) 0.079(6) 0.002(4) 0.029(5) -0.015(5)
C68 0.076(5) 0.091(7) 0.057(5) -0.003(4) 0.030(4) 0.003(5)
C69 0.064(4) 0.073(5) 0.041(4) -0.003(3) 0.011(3) -0.002(4)
C70 0.074(5) 0.064(5) 0.045(4) -0.010(3) 0.015(4) 0.019(4)
C71 0.064(5) 0.085(6) 0.062(5) 0.002(4) 0.025(4) 0.016(4)
C72 0.066(6) 0.33(2) 0.126(10) 0.105(13) 0.041(7) 0.024(10)
C73 0.071(7) 0.34(3) 0.153(12) 0.120(15) 0.055(8) 0.053(11)
C74 0.076(7) 0.085(7) 0.155(11) -0.001(6) 0.056(7) 0.017(5)
C75 0.089(7) 0.125(8) 0.086(6) -0.013(6) 0.055(6) -0.005(6)
C76 0.066(5) 0.134(8) 0.058(5) -0.008(5) 0.020(4) 0.012(5)
C77 0.088(8) 0.195(16) 0.173(13) 0.043(12) 0.098(9) 0.043(9)
C78 0.139(13) 0.21(2) 0.24(2) 0.079(16) 0.079(15) 0.071(15)
C79 0.198(17) 0.113(12) 0.54(4) -0.037(17) 0.27(2) 0.023(12)
C80 0.190(16) 0.223(19) 0.35(3) -0.04(2) 0.24(2) -0.040(15)
C81 0.074(5) 0.059(5) 0.076(5) -0.001(4) 0.028(4) 0.003(4)
C82 0.063(4) 0.048(4) 0.089(6) -0.015(4) 0.033(4) -0.008(3)
C83 0.059(5) 0.059(5) 0.121(8) -0.019(5) 0.053(5) -0.004(4)
C84 0.058(5) 0.102(8) 0.140(10) 0.019(7) 0.029(6) 0.030(5)
C85 0.122(9) 0.121(10) 0.138(11) 0.056(8) 0.021(9) 0.062(8)
C86 0.095(8) 0.218(16) 0.108(10) 0.058(10) 0.042(7) 0.056(10)
C87 0.089(7) 0.123(9) 0.093(7) 0.009(6) 0.015(6) 0.013(7)
C88 0.058(4) 0.087(6) 0.083(6) 0.016(5) 0.011(4) 0.008(4)
C89 0.069(5) 0.064(5) 0.101(7) 0.014(4) 0.037(5) 0.004(4)
C90 0.059(5) 0.099(7) 0.125(9) 0.012(6) 0.037(6) 0.013(5)
C91 0.073(5) 0.079(6) 0.140(8) -0.028(6) 0.064(6) -0.010(5)
C92 0.32(2) 0.102(9) 0.261(18) -0.104(11) 0.240(19) -0.097(12)
C93 0.176(13) 0.134(11) 0.209(15) -0.041(10) 0.153(12) -0.048(10)
C94 0.118(9) 0.117(9) 0.242(16) -0.109(10) 0.118(10) -0.024(8)
C95 0.148(11) 0.122(11) 0.254(18) -0.106(12) 0.129(13) -0.070(9)
C96 0.126(8) 0.082(7) 0.140(9) -0.040(6) 0.081(8) -0.046(6)
C97 0.109(10) 0.31(2) 0.239(19) -0.179(19) 0.122(12) -0.088(14)
C98 0.180(15) 0.196(16) 0.183(15) -0.069(13) 0.114(13) -0.019(13)
C99 0.33(3) 0.23(2) 0.26(2) -0.13(2) 0.23(3) -0.12(2)
C100 0.30(3) 0.63(7) 0.22(2) -0.12(4) 0.07(2) 0.32(4)
S4 0.0769(14) 0.0757(14) 0.0880(15) -0.0220(11) 0.0440(12) -0.0158(11)
O12 0.230(10) 0.103(6) 0.240(11) -0.041(6) 0.188(10) -0.048(6)
O13 0.108(6) 0.138(8) 0.273(14) -0.040(8) 0.029(7) -0.048(6)
O14 0.384(18) 0.115(7) 0.137(7) -0.032(5) 0.175(10) -0.101(9)
S5 0.0682(11) 0.0869(15) 0.0700(12) -0.0237(11) 0.0332(10) -0.0084(12)
O15 0.101(4) 0.089(4) 0.104(5) -0.028(4) 0.036(4) 0.014(4)
O16 0.098(4) 0.076(4) 0.063(3) -0.002(3) 0.030(3) 0.033(3)
O17 0.106(5) 0.130(6) 0.094(5) -0.017(4) 0.050(4) -0.010(4)
Mg2 0.172(4) 0.147(4) 0.150(4) -0.023(3) 0.060(4) -0.003(4)
O18 0.094(6) 0.103(7) 0.120(7) 0.000 0.076(6) 0.000
O19 0.089(4) 0.069(3) 0.074(3) -0.028(3) 0.005(3) 0.001(3)
K3 0.121(4) 0.133(5) 0.568(19) 0.000 0.026(7) 0.000
K4 0.136(2) 0.140(2) 0.0896(15) -0.0130(14) 0.0650(15) -0.0199(17)
O20 0.37(2) 0.235(14) 0.203(12) -0.108(11) 0.188(14) -0.156(15)
S6 0.475(10) 0.089(2) 0.0650(19) -0.0167(15) 0.084(4) -0.118(4)
O21 0.152(7) 0.076(5) 0.175(10) -0.029(6) -0.046(7) 0.002(5)
O22 0.65(3) 0.053(5) 0.306(14) -0.094(7) 0.384(19) -0.143(10)
O23 0.79(5) 0.241(15) 0.073(6) 0.040(7) -0.049(12) -0.36(2)
C101 0.32(2) 0.049(5) 0.078(6) -0.013(5) 0.085(9) -0.005(9)
C102 0.34(2) 0.063(6) 0.061(6) -0.007(5) 0.067(9) -0.013(9)
C103 0.257(15) 0.049(5) 0.070(6) -0.002(5) 0.076(8) 0.005(8)
C104 0.220(14) 0.090(8) 0.072(7) -0.028(6) 0.046(8) -0.011(9)
C105 0.201(15) 0.142(13) 0.128(11) -0.001(9) 0.082(11) -0.009(12)
C106 0.191(15) 0.127(12) 0.199(18) -0.035(12) 0.118(14) -0.018(10)
C107 0.214(16) 0.079(9) 0.172(15) 0.013(9) 0.123(13) 0.021(10)
C108 0.230(17) 0.074(8) 0.136(11) -0.017(7) 0.094(11) 0.021(10)
C109 0.302(19) 0.058(6) 0.122(10) -0.030(6) 0.128(12) -0.037(9)
C110 0.224(15) 0.099(9) 0.079(8) 0.001(6) 0.054(9) -0.002(10)
C111 0.170(10) 0.073(6) 0.069(6) -0.004(5) 0.058(6) 0.015(7)
C112 0.142(10) 0.100(8) 0.087(7) 0.005(6) 0.008(7) 0.029(7)
C113 0.148(10) 0.106(9) 0.109(8) -0.006(7) 0.070(8) 0.030(8)
C114 0.077(5) 0.091(7) 0.062(5) 0.013(4) 0.024(4) 0.034(5)
C115 0.122(8) 0.079(6) 0.082(6) -0.004(5) 0.048(6) 0.015(6)
C116 0.206(13) 0.076(7) 0.085(7) -0.001(5) 0.075(8) 0.021(8)
C117 0.082(6) 0.124(8) 0.064(5) 0.004(5) 0.029(5) 0.020(6)
C118 0.201(19) 0.26(2) 0.22(2) 0.103(17) 0.126(17) 0.032(17)
C119 0.146(12) 0.229(19) 0.159(13) 0.078(13) 0.081(11) 0.040(13)
C120 0.36(3) 0.200(18) 0.090(9) 0.007(10) 0.097(14) -0.088(19)
 
_geom_special_details
;
 All esds (except the esd in the dihedral angle between two l.s. planes)
 are estimated using the full covariance matrix.  The cell esds are taken
 into account individually in the estimation of esds in distances, angles
 and torsion angles; correlations between esds in cell parameters are only
 used when they are defined by crystal symmetry.  An approximate (isotropic)
 treatment of cell esds is used for estimating esds involving l.s. planes.
;
 
loop_
 _geom_bond_atom_site_label_1
 _geom_bond_atom_site_label_2
 _geom_bond_distance
 _geom_bond_site_symmetry_2
 _geom_bond_publ_flag
C1 C2 1.374(13) . ?
C1 C9 1.387(14) . ?
C1 C21 1.521(15) . ?
C2 C3 1.427(14) . ?
C2 S1 1.786(10) . ?
C3 C4 1.340(14) . ?
C3 C11 1.450(14) . ?
C4 C10 1.365(17) . ?
C4 H4 0.9500 . ?
C5 C6 1.29(2) . ?
C5 C10 1.471(19) . ?
C5 H5 0.9500 . ?
C6 C7 1.26(2) . ?
C6 H6 0.9500 . ?
C7 C8 1.42(2) . ?
C7 H7 0.9500 . ?
C8 C9 1.447(16) . ?
C8 H8 0.9500 . ?
C9 C10 1.456(16) . ?
C11 C16 1.327(13) . ?
C11 C12 1.406(14) . ?
C12 C13 1.372(15) . ?
C12 K2 3.538(14) 2 ?
C12 H12 0.9500 . ?
C13 C14 1.326(15) . ?
C13 H13 0.9500 . ?
C14 C15 1.396(16) . ?
C14 C17 1.522(17) . ?
C15 C16 1.375(15) . ?
C15 H15 0.9500 . ?
C16 H16 0.9500 . ?
C17 C20 1.431(19) . ?
C17 C18 1.44(3) . ?
C17 C19 1.506(18) . ?
C18 H18 0.9801 . ?
C18 H18A 0.9801 . ?
C18 H18B 0.9801 . ?
C19 H19 0.9800 . ?
C19 H19A 0.9800 . ?
C19 H19B 0.9800 . ?
C20 H20 0.9800 . ?
C20 H20A 0.9800 . ?
C20 H20B 0.9800 . ?
C21 C22 1.376(12) . ?
C21 C29 1.444(16) . ?
C22 C23 1.462(14) . ?
C22 S2 1.775(11) . ?
C23 C24 1.349(15) . ?
C23 C31 1.460(13) . ?
C24 C30 1.454(18) . ?
C24 H24 0.9500 . ?
C25 C26 1.39(2) . ?
C25 C30 1.42(2) . ?
C25 H25 0.9500 . ?
C26 C27 1.38(2) . ?
C26 H26 0.9500 . ?
C27 C28 1.423(19) . ?
C27 H27 0.9500 . ?
C28 C29 1.461(17) . ?
C28 H28 0.9500 . ?
C29 C30 1.355(18) . ?
C31 C32 1.330(15) . ?
C31 C36 1.432(15) . ?
C32 C33 1.458(16) . ?
C32 H32 0.9500 . ?
C33 C34 1.355(15) . ?
C33 H33 0.9500 . ?
C34 C35 1.37(2) . ?
C34 C37 1.533(16) . ?
C35 C36 1.400(17) . ?
C35 H35 0.9500 . ?
C36 K2 3.478(18) . ?
C36 H36 0.9500 . ?
C37 C40 1.45(3) . ?
C37 C38 1.48(2) . ?
C37 C39 1.56(2) . ?
C38 H38 0.9800 . ?
C38 H38A 0.9800 . ?
C38 H38B 0.9800 . ?
C39 H39 0.9800 . ?
C39 H39A 0.9800 . ?
C39 H39B 0.9800 . ?
C40 H40 1.0063 . ?
C40 H40A 1.0174 . ?
C40 H40B 1.0181 . ?
S1 O2 1.380(8) . ?
S1 O3 1.389(9) . ?
S1 O1 1.541(11) . ?
S1 K2 3.542(4) 2 ?
S1 K1 3.661(8) . ?
O1 Mg1 2.120(10) . ?
O1 K2 2.926(11) 2 ?
O2 K2 3.118(10) 2 ?
O3 K1 2.460(10) . ?
S2 O4 1.349(9) . ?
S2 O5 1.352(9) . ?
S2 O6 1.419(8) . ?
S2 K2 3.652(4) . ?
O4 Mg1 2.251(11) . ?
O4 K2 2.856(11) . ?
O6 K2 3.305(12) . ?
Mg1 O8 2.023(15) . ?
Mg1 O1 2.120(10) 2 ?
Mg1 O7 2.216(13) . ?
Mg1 O4 2.251(11) 2 ?
Mg1 K2 3.992(3) 2 ?
Mg1 K2 3.992(3) . ?
K1 O10 2.487(12) . ?
K1 S3 3.737(10) . ?
K2 O9 2.673(11) . ?
K2 O1 2.926(11) 2 ?
K2 O2 3.118(10) 2 ?
K2 C12 3.538(14) 2 ?
K2 S1 3.542(4) 2 ?
S3 O11 1.403(7) . ?
S3 O10 1.423(6) . ?
S3 O9 1.450(8) . ?
S3 C42 1.798(9) . ?
C41 C42 1.391(11) . ?
C41 C49 1.418(12) . ?
C41 C41 1.540(14) 2 ?
C42 C43 1.422(10) . ?
C43 C44 1.352(12) . ?
C43 C51 1.551(12) . ?
C44 C50 1.418(14) . ?
C44 H44 0.9500 . ?
C45 C46 1.301(18) . ?
C45 C50 1.400(16) . ?
C45 H45 0.9500 . ?
C46 C47 1.408(18) . ?
C46 H46 0.9500 . ?
C47 C48 1.319(15) . ?
C47 H47 0.9500 . ?
C48 C49 1.401(13) . ?
C48 H48 0.9500 . ?
C49 C50 1.381(13) . ?
C51 C52 1.340(12) . ?
C51 C56 1.379(12) . ?
C52 C53 1.347(11) . ?
C52 H52 0.9500 . ?
C53 C54 1.378(11) . ?
C53 H53 0.9500 . ?
C54 C55 1.386(13) . ?
C54 C57 1.555(11) . ?
C55 C56 1.399(13) . ?
C55 H55 0.9500 . ?
C56 H56 0.9500 . ?
C57 C60 1.474(19) . ?
C57 C59 1.542(18) . ?
C57 C58 1.557(14) . ?
C58 H58 0.9800 . ?
C58 H58A 0.9800 . ?
C58 H58B 0.9800 . ?
C59 H59 0.9800 . ?
C59 H59A 0.9800 . ?
C59 H59B 0.9800 . ?
C60 H60 0.9801 . ?
C60 H60A 0.9801 . ?
C60 H60B 0.9801 . ?
C61 C62 1.413(10) . ?
C61 C69 1.439(11) . ?
C61 C81 1.509(11) . ?
C62 C63 1.392(10) . ?
C62 S4 1.793(8) . ?
C63 C64 1.384(12) . ?
C63 C71 1.486(11) . ?
C64 C70 1.391(12) . ?
C64 H64 0.9500 . ?
C65 C66 1.360(14) . ?
C65 C70 1.411(13) . ?
C65 H65 0.9500 . ?
C66 C67 1.346(13) . ?
C66 H66 0.9500 . ?
C67 C68 1.381(12) . ?
C67 H67 0.9500 . ?
C68 C69 1.424(11) . ?
C68 H68 0.9500 . ?
C69 C70 1.393(10) . ?
C71 C72 1.368(14) . ?
C71 C76 1.386(11) . ?
C72 C73 1.429(17) . ?
C72 H72 0.9500 . ?
C73 C74 1.394(18) . ?
C73 H73 0.9500 . ?
C74 C75 1.308(14) . ?
C74 C77 1.511(15) . ?
C75 C76 1.439(12) . ?
C75 H75 0.9500 . ?
C76 H76 0.9500 . ?
C77 C79 1.43(2) . ?
C77 C80 1.46(3) . ?
C77 C78 1.65(3) . ?
C78 H78 0.9801 . ?
C78 H78A 0.9801 . ?
C78 H78B 0.9801 . ?
C79 H79 0.9801 . ?
C79 H79A 0.9801 . ?
C79 H79B 0.9801 . ?
C80 H80 0.9800 . ?
C80 H80A 0.9800 . ?
C80 H80B 0.9800 . ?
C81 C82 1.398(11) . ?
C81 C89 1.438(12) . ?
C82 C83 1.473(11) . ?
C82 S5 1.769(9) . ?
C83 C84 1.281(14) . ?
C83 C91 1.482(13) . ?
C84 C90 1.446(16) . ?
C84 H84 0.9500 . ?
C85 C90 1.418(16) . ?
C85 C86 1.427(19) . ?
C85 H85 0.9500 . ?
C86 C87 1.369(16) . ?
C86 H86 0.9500 . ?
C87 C88 1.348(13) . ?
C87 H87 0.9500 . ?
C88 C89 1.410(13) . ?
C88 H88 0.9500 . ?
C89 C90 1.430(12) . ?
C91 C92 1.321(15) . ?
C91 C96 1.348(13) . ?
C92 C93 1.442(16) . ?
C92 H92 0.9500 . ?
C93 C94 1.391(17) . ?
C93 H93 0.9500 . ?
C94 C95 1.315(18) . ?
C94 C97 1.512(17) . ?
C95 C96 1.387(17) . ?
C95 H95 0.9500 . ?
C96 H96 0.9500 . ?
C97 C99 1.38(3) . ?
C97 C100 1.50(3) . ?
C97 C98 1.50(2) . ?
C98 H98 0.9800 . ?
C98 H98A 0.9800 . ?
C98 H98B 0.9800 . ?
C99 C100 1.99(5) . ?
C99 H99 0.9823 . ?
C99 H99A 0.9823 . ?
C99 H99B 0.9824 . ?
C100 H100 1.1121 . ?
C100 H101 1.1065 . ?
C100 H102 1.1181 . ?
S4 O14 1.343(9) . ?
S4 O12 1.391(8) . ?
S4 O13 1.422(10) . ?
S4 K4 3.797(4) 2_656 ?
O12 Mg2 2.291(13) . ?
O13 K4 2.650(9) 2_656 ?
S5 O16 1.396(5) . ?
S5 O17 1.407(7) . ?
S5 O15 1.499(7) . ?
S5 K4 3.785(3) . ?
S5 K3 3.791(4) . ?
O15 Mg2 2.220(10) . ?
O15 K4 2.756(7) . ?
O16 K3 2.544(6) . ?
Mg2 O18 1.843(9) . ?
Mg2 O19 2.112(9) . ?
Mg2 O22 2.311(13) . ?
Mg2 O22 2.564(19) 2_656 ?
Mg2 Mg2 2.994(12) 2_656 ?
Mg2 K4 3.904(6) . ?
Mg2 K4 4.317(6) 2_656 ?
O18 Mg2 1.843(9) 2_656 ?
O18 K3 3.251(12) . ?
K3 O16 2.544(6) 2_656 ?
K3 S5 3.791(4) 2_656 ?
K4 O13 2.650(9) 2_656 ?
K4 O20 2.707(14) . ?
K4 O22 2.785(8) . ?
K4 O21 2.987(10) . ?
K4 S4 3.797(4) 2_656 ?
K4 Mg2 4.317(6) 2_656 ?
S6 O21 1.302(14) . ?
S6 O23 1.369(11) . ?
S6 O22 1.448(16) . ?
S6 C102 1.720(16) . ?
O22 Mg2 2.564(19) 2_656 ?
C101 C102 1.402(18) . ?
C101 C109 1.43(2) . ?
C101 C101 1.57(2) 2_656 ?
C102 C103 1.466(17) . ?
C103 C104 1.350(18) . ?
C103 C111 1.457(14) . ?
C104 C110 1.416(18) . ?
C104 H104 0.9500 . ?
C105 C106 1.36(2) . ?
C105 C110 1.55(2) . ?
C105 H105 0.9500 . ?
C106 C107 1.42(2) . ?
C106 H106 0.9500 . ?
C107 C108 1.35(2) . ?
C107 H107 0.9500 . ?
C108 C109 1.487(19) . ?
C108 H108 0.9500 . ?
C109 C110 1.354(18) . ?
C111 C112 1.388(16) . ?
C111 C116 1.415(15) . ?
C112 C113 1.390(16) . ?
C112 H112 0.9500 . ?
C113 C114 1.370(14) . ?
C113 H113 0.9500 . ?
C114 C115 1.348(12) . ?
C114 C117 1.535(13) . ?
C115 C116 1.368(14) . ?
C115 H115 0.9500 . ?
C116 H116 0.9500 . ?
C117 C118 1.37(2) . ?
C117 C120 1.530(19) . ?
C117 C119 1.56(2) . ?
C118 H118 0.9801 . ?
C118 H119 0.9801 . ?
C118 H120 0.9801 . ?
C119 H121 0.9800 . ?
C119 H122 0.9800 . ?
C119 H123 0.9800 . ?
C120 H124 0.9802 . ?
C120 H125 0.9802 . ?
C120 H126 0.9802 . ?
 
loop_
 _geom_angle_atom_site_label_1
 _geom_angle_atom_site_label_2
 _geom_angle_atom_site_label_3
 _geom_angle
 _geom_angle_site_symmetry_1
 _geom_angle_site_symmetry_3
 _geom_angle_publ_flag
C2 C1 C9 119.7(10) . . ?
C2 C1 C21 124.7(9) . . ?
C9 C1 C21 114.7(9) . . ?
C1 C2 C3 121.9(9) . . ?
C1 C2 S1 121.5(8) . . ?
C3 C2 S1 116.4(7) . . ?
C4 C3 C2 116.6(10) . . ?
C4 C3 C11 115.2(10) . . ?
C2 C3 C11 128.0(9) . . ?
C3 C4 C10 124.9(11) . . ?
C3 C4 H4 117.6 . . ?
C10 C4 H4 117.5 . . ?
C6 C5 C10 126.4(13) . . ?
C6 C5 H5 116.8 . . ?
C10 C5 H5 116.8 . . ?
C7 C6 C5 116.9(14) . . ?
C7 C6 H6 121.5 . . ?
C5 C6 H6 121.6 . . ?
C6 C7 C8 128.7(14) . . ?
C6 C7 H7 115.6 . . ?
C8 C7 H7 115.7 . . ?
C7 C8 C9 116.0(14) . . ?
C7 C8 H8 122.0 . . ?
C9 C8 H8 122.0 . . ?
C1 C9 C8 124.6(11) . . ?
C1 C9 C10 118.3(11) . . ?
C8 C9 C10 117.1(11) . . ?
C4 C10 C9 118.0(10) . . ?
C4 C10 C5 127.0(12) . . ?
C9 C10 C5 114.9(12) . . ?
C16 C11 C12 115.8(9) . . ?
C16 C11 C3 121.1(9) . . ?
C12 C11 C3 122.8(8) . . ?
C13 C12 C11 120.6(8) . . ?
C13 C12 K2 82.4(8) . 2 ?
C11 C12 K2 113.0(7) . 2 ?
C13 C12 H12 119.7 . . ?
C11 C12 H12 119.7 . . ?
K2 C12 H12 75.0 2 . ?
C14 C13 C12 124.3(10) . . ?
C14 C13 H13 117.8 . . ?
C12 C13 H13 117.9 . . ?
C13 C14 C15 113.9(10) . . ?
C13 C14 C17 126.8(12) . . ?
C15 C14 C17 118.8(12) . . ?
C16 C15 C14 122.9(10) . . ?
C16 C15 H15 118.5 . . ?
C14 C15 H15 118.5 . . ?
C11 C16 C15 122.1(10) . . ?
C11 C16 H16 119.0 . . ?
C15 C16 H16 118.9 . . ?
C20 C17 C18 101.6(16) . . ?
C20 C17 C19 111.9(14) . . ?
C18 C17 C19 106.0(13) . . ?
C20 C17 C14 110.2(11) . . ?
C18 C17 C14 110.9(13) . . ?
C19 C17 C14 115.3(11) . . ?
C17 C18 H18 109.6 . . ?
C17 C18 H18A 109.4 . . ?
H18 C18 H18A 109.5 . . ?
C17 C18 H18B 109.4 . . ?
H18 C18 H18B 109.5 . . ?
H18A C18 H18B 109.5 . . ?
C17 C19 H19 109.3 . . ?
C17 C19 H19A 109.6 . . ?
H19 C19 H19A 109.5 . . ?
C17 C19 H19B 109.5 . . ?
H19 C19 H19B 109.5 . . ?
H19A C19 H19B 109.5 . . ?
C17 C20 H20 109.5 . . ?
C17 C20 H20A 109.4 . . ?
H20 C20 H20A 109.5 . . ?
C17 C20 H20B 109.5 . . ?
H20 C20 H20B 109.5 . . ?
H20A C20 H20B 109.5 . . ?
C22 C21 C29 119.4(10) . . ?
C22 C21 C1 122.4(10) . . ?
C29 C21 C1 118.2(8) . . ?
C21 C22 C23 121.1(9) . . ?
C21 C22 S2 122.1(8) . . ?
C23 C22 S2 116.7(7) . . ?
C24 C23 C22 117.9(9) . . ?
C24 C23 C31 115.3(11) . . ?
C22 C23 C31 126.8(10) . . ?
C23 C24 C30 121.4(12) . . ?
C23 C24 H24 119.3 . . ?
C30 C24 H24 119.3 . . ?
C26 C25 C30 121.2(16) . . ?
C26 C25 H25 119.4 . . ?
C30 C25 H25 119.3 . . ?
C27 C26 C25 120.2(17) . . ?
C27 C26 H26 120.0 . . ?
C25 C26 H26 119.8 . . ?
C26 C27 C28 120.1(15) . . ?
C26 C27 H27 119.9 . . ?
C28 C27 H27 120.0 . . ?
C27 C28 C29 118.5(15) . . ?
C27 C28 H28 120.8 . . ?
C29 C28 H28 120.7 . . ?
C30 C29 C21 119.7(10) . . ?
C30 C29 C28 120.2(13) . . ?
C21 C29 C28 120.1(12) . . ?
C29 C30 C25 119.4(14) . . ?
C29 C30 C24 120.3(12) . . ?
C25 C30 C24 120.1(15) . . ?
C32 C31 C36 115.8(9) . . ?
C32 C31 C23 124.8(9) . . ?
C36 C31 C23 119.0(9) . . ?
C31 C32 C33 123.1(10) . . ?
C31 C32 H32 118.4 . . ?
C33 C32 H32 118.5 . . ?
C34 C33 C32 120.4(11) . . ?
C34 C33 H33 119.8 . . ?
C32 C33 H33 119.8 . . ?
C33 C34 C35 117.0(11) . . ?
C33 C34 C37 122.1(11) . . ?
C35 C34 C37 120.8(12) . . ?
C34 C35 C36 123.1(14) . . ?
C34 C35 H35 118.5 . . ?
C36 C35 H35 118.5 . . ?
C35 C36 C31 120.4(11) . . ?
C35 C36 K2 84.2(11) . . ?
C31 C36 K2 97.3(10) . . ?
C35 C36 H36 119.9 . . ?
C31 C36 H36 119.8 . . ?
K2 C36 H36 88.5 . . ?
C40 C37 C38 117(2) . . ?
C40 C37 C34 107.2(13) . . ?
C38 C37 C34 111.0(10) . . ?
C40 C37 C39 107(2) . . ?
C38 C37 C39 102.8(14) . . ?
C34 C37 C39 112.0(14) . . ?
C37 C38 H38 109.3 . . ?
C37 C38 H38A 109.5 . . ?
H38 C38 H38A 109.5 . . ?
C37 C38 H38B 109.6 . . ?
H38 C38 H38B 109.5 . . ?
H38A C38 H38B 109.5 . . ?
C37 C39 H39 109.4 . . ?
C37 C39 H39A 109.4 . . ?
H39 C39 H39A 109.5 . . ?
C37 C39 H39B 109.5 . . ?
H39 C39 H39B 109.5 . . ?
H39A C39 H39B 109.5 . . ?
C37 C40 H40 110.4 . . ?
C37 C40 H40A 114.2 . . ?
H40 C40 H40A 106.7 . . ?
C37 C40 H40B 114.4 . . ?
H40 C40 H40B 105.1 . . ?
H40A C40 H40B 105.3 . . ?
O2 S1 O3 116.3(7) . . ?
O2 S1 O1 112.8(6) . . ?
O3 S1 O1 111.8(7) . . ?
O2 S1 C2 107.7(4) . . ?
O3 S1 C2 106.8(5) . . ?
O1 S1 C2 99.8(6) . . ?
O2 S1 K2 61.1(4) . 2 ?
O3 S1 K2 122.0(3) . 2 ?
O1 S1 K2 54.4(4) . 2 ?
C2 S1 K2 130.1(4) . 2 ?
O2 S1 K1 116.1(4) . . ?
O3 S1 K1 24.1(4) . . ?
O1 S1 K1 91.8(5) . . ?
C2 S1 K1 125.5(4) . . ?
K2 S1 K1 99.74(18) 2 . ?
S1 O1 Mg1 154.8(7) . . ?
S1 O1 K2 100.3(5) . 2 ?
Mg1 O1 K2 103.4(3) . 2 ?
S1 O2 K2 96.1(4) . 2 ?
S1 O3 K1 142.6(7) . . ?
O4 S2 O5 100.8(9) . . ?
O4 S2 O6 109.3(7) . . ?
O5 S2 O6 121.2(8) . . ?
O4 S2 C22 106.2(5) . . ?
O5 S2 C22 108.9(4) . . ?
O6 S2 C22 109.2(4) . . ?
O4 S2 K2 44.7(5) . . ?
O5 S2 K2 127.6(4) . . ?
O6 S2 K2 64.7(5) . . ?
C22 S2 K2 117.5(3) . . ?
S2 O4 Mg1 128.0(8) . . ?
S2 O4 K2 115.8(6) . . ?
Mg1 O4 K2 102.2(3) . . ?
S2 O6 K2 92.4(5) . . ?
O8 Mg1 O1 83.1(4) . . ?
O8 Mg1 O1 83.1(4) . 2 ?
O1 Mg1 O1 166.2(8) . 2 ?
O8 Mg1 O7 180.0 . . ?
O1 Mg1 O7 96.9(4) . . ?
O1 Mg1 O7 96.9(4) 2 . ?
O8 Mg1 O4 85.7(3) . . ?
O1 Mg1 O4 91.5(4) . . ?
O1 Mg1 O4 87.4(4) 2 . ?
O7 Mg1 O4 94.3(3) . . ?
O8 Mg1 O4 85.7(3) . 2 ?
O1 Mg1 O4 87.4(4) . 2 ?
O1 Mg1 O4 91.5(4) 2 2 ?
O7 Mg1 O4 94.3(3) . 2 ?
O4 Mg1 O4 171.5(7) . 2 ?
O8 Mg1 K2 70.71(10) . 2 ?
O1 Mg1 K2 45.5(3) . 2 ?
O1 Mg1 K2 128.5(4) 2 2 ?
O7 Mg1 K2 109.29(10) . 2 ?
O4 Mg1 K2 131.7(3) . 2 ?
O4 Mg1 K2 44.4(3) 2 2 ?
O8 Mg1 K2 70.71(10) . . ?
O1 Mg1 K2 128.5(4) . . ?
O1 Mg1 K2 45.5(3) 2 . ?
O7 Mg1 K2 109.29(10) . . ?
O4 Mg1 K2 44.4(3) . . ?
O4 Mg1 K2 131.7(3) 2 . ?
K2 Mg1 K2 141.42(19) 2 . ?
O3 K1 O10 138.8(6) . . ?
O3 K1 S1 13.3(3) . . ?
O10 K1 S1 126.5(5) . . ?
O3 K1 S3 130.3(5) . . ?
O10 K1 S3 12.8(2) . . ?
S1 K1 S3 119.4(3) . . ?
O9 K2 O4 81.6(3) . . ?
O9 K2 O1 78.0(4) . 2 ?
O4 K2 O1 63.0(3) . 2 ?
O9 K2 O2 95.6(3) . 2 ?
O4 K2 O2 108.9(3) . 2 ?
O1 K2 O2 47.4(2) 2 2 ?
O9 K2 O6 118.6(2) . . ?
O4 K2 O6 42.2(2) . . ?
O1 K2 O6 91.5(3) 2 . ?
O2 K2 O6 120.4(2) 2 . ?
O9 K2 C36 76.1(3) . . ?
O4 K2 C36 72.4(3) . . ?
O1 K2 C36 130.9(3) 2 . ?
O2 K2 C36 171.5(3) 2 . ?
O6 K2 C36 66.4(3) . . ?
O9 K2 C12 137.5(3) . 2 ?
O4 K2 C12 77.0(3) . 2 ?
O1 K2 C12 59.6(3) 2 2 ?
O2 K2 C12 58.5(2) 2 2 ?
O6 K2 C12 63.7(2) . 2 ?
C36 K2 C12 129.2(3) . 2 ?
O9 K2 S1 83.0(3) . 2 ?
O4 K2 S1 88.2(2) . 2 ?
O1 K2 S1 25.3(2) 2 2 ?
O2 K2 S1 22.79(15) 2 2 ?
O6 K2 S1 111.11(19) . 2 ?
C36 K2 S1 153.2(2) . 2 ?
C12 K2 S1 60.2(2) 2 2 ?
O9 K2 S2 98.3(2) . . ?
O4 K2 S2 19.4(2) . . ?
O1 K2 S2 76.3(3) 2 . ?
O2 K2 S2 116.81(19) 2 . ?
O6 K2 S2 22.85(13) . . ?
C36 K2 S2 67.1(2) . . ?
C12 K2 S2 70.51(17) 2 . ?
S1 K2 S2 100.02(12) 2 . ?
O9 K2 Mg1 70.6(2) . . ?
O4 K2 Mg1 33.4(2) . . ?
O1 K2 Mg1 31.10(19) 2 . ?
O2 K2 Mg1 78.47(16) 2 . ?
O6 K2 Mg1 70.65(15) . . ?
C36 K2 Mg1 100.31(18) . . ?
C12 K2 Mg1 71.35(19) 2 . ?
S1 K2 Mg1 56.27(8) 2 . ?
S2 K2 Mg1 50.24(6) . . ?
O11 S3 O10 116.8(6) . . ?
O11 S3 O9 109.0(7) . . ?
O10 S3 O9 109.5(6) . . ?
O11 S3 C42 108.0(4) . . ?
O10 S3 C42 107.6(4) . . ?
O9 S3 C42 105.4(5) . . ?
O11 S3 K1 114.0(4) . . ?
O10 S3 K1 22.8(4) . . ?
O9 S3 K1 90.6(4) . . ?
C42 S3 K1 126.7(3) . . ?
S3 O9 K2 133.3(8) . . ?
S3 O10 K1 144.4(6) . . ?
C42 C41 C49 119.5(6) . . ?
C42 C41 C41 123.1(7) . 2 ?
C49 C41 C41 117.0(6) . 2 ?
C41 C42 C43 121.0(7) . . ?
C41 C42 S3 122.5(5) . . ?
C43 C42 S3 116.5(6) . . ?
C44 C43 C42 118.7(7) . . ?
C44 C43 C51 116.5(7) . . ?
C42 C43 C51 124.8(7) . . ?
C43 C44 C50 121.4(8) . . ?
C43 C44 H44 119.3 . . ?
C50 C44 H44 119.3 . . ?
C46 C45 C50 120.4(11) . . ?
C46 C45 H45 119.8 . . ?
C50 C45 H45 119.8 . . ?
C45 C46 C47 122.7(12) . . ?
C45 C46 H46 118.6 . . ?
C47 C46 H46 118.7 . . ?
C48 C47 C46 116.7(9) . . ?
C48 C47 H47 121.6 . . ?
C46 C47 H47 121.7 . . ?
C47 C48 C49 123.6(9) . . ?
C47 C48 H48 118.3 . . ?
C49 C48 H48 118.2 . . ?
C50 C49 C48 117.4(9) . . ?
C50 C49 C41 119.1(8) . . ?
C48 C49 C41 123.5(8) . . ?
C49 C50 C45 119.0(9) . . ?
C49 C50 C44 120.4(9) . . ?
C45 C50 C44 120.6(9) . . ?
C52 C51 C56 120.2(8) . . ?
C52 C51 C43 120.4(8) . . ?
C56 C51 C43 118.9(9) . . ?
C51 C52 C53 120.5(8) . . ?
C51 C52 H52 119.8 . . ?
C53 C52 H52 119.7 . . ?
C52 C53 C54 123.3(8) . . ?
C52 C53 H53 118.3 . . ?
C54 C53 H53 118.3 . . ?
C53 C54 C55 115.8(7) . . ?
C53 C54 C57 125.2(8) . . ?
C55 C54 C57 119.0(8) . . ?
C54 C55 C56 121.6(9) . . ?
C54 C55 H55 119.2 . . ?
C56 C55 H55 119.2 . . ?
C51 C56 C55 118.6(9) . . ?
C51 C56 H56 120.7 . . ?
C55 C56 H56 120.7 . . ?
C60 C57 C59 106.4(13) . . ?
C60 C57 C54 112.9(9) . . ?
C59 C57 C54 109.6(8) . . ?
C60 C57 C58 110.0(10) . . ?
C59 C57 C58 108.7(8) . . ?
C54 C57 C58 109.1(8) . . ?
C57 C58 H58 109.5 . . ?
C57 C58 H58A 109.5 . . ?
H58 C58 H58A 109.5 . . ?
C57 C58 H58B 109.4 . . ?
H58 C58 H58B 109.5 . . ?
H58A C58 H58B 109.5 . . ?
C57 C59 H59 109.4 . . ?
C57 C59 H59A 109.4 . . ?
H59 C59 H59A 109.5 . . ?
C57 C59 H59B 109.6 . . ?
H59 C59 H59B 109.5 . . ?
H59A C59 H59B 109.5 . . ?
C57 C60 H60 109.4 . . ?
C57 C60 H60A 109.6 . . ?
H60 C60 H60A 109.5 . . ?
C57 C60 H60B 109.5 . . ?
H60 C60 H60B 109.5 . . ?
H60A C60 H60B 109.5 . . ?
C62 C61 C69 120.0(6) . . ?
C62 C61 C81 124.9(7) . . ?
C69 C61 C81 114.4(7) . . ?
C63 C62 C61 120.4(7) . . ?
C63 C62 S4 118.1(6) . . ?
C61 C62 S4 121.5(6) . . ?
C64 C63 C62 117.8(7) . . ?
C64 C63 C71 115.5(7) . . ?
C62 C63 C71 126.7(8) . . ?
C63 C64 C70 124.1(7) . . ?
C63 C64 H64 118.0 . . ?
C70 C64 H64 117.9 . . ?
C66 C65 C70 120.7(9) . . ?
C66 C65 H65 119.7 . . ?
C70 C65 H65 119.6 . . ?
C67 C66 C65 120.7(9) . . ?
C67 C66 H66 119.6 . . ?
C65 C66 H66 119.7 . . ?
C66 C67 C68 121.7(8) . . ?
C66 C67 H67 119.2 . . ?
C68 C67 H67 119.1 . . ?
C67 C68 C69 118.7(8) . . ?
C67 C68 H68 120.6 . . ?
C69 C68 H68 120.6 . . ?
C70 C69 C68 119.2(8) . . ?
C70 C69 C61 118.7(7) . . ?
C68 C69 C61 122.0(7) . . ?
C64 C70 C69 118.7(7) . . ?
C64 C70 C65 122.5(8) . . ?
C69 C70 C65 118.8(8) . . ?
C72 C71 C76 117.7(8) . . ?
C72 C71 C63 123.1(8) . . ?
C76 C71 C63 119.2(7) . . ?
C71 C72 C73 119.0(11) . . ?
C71 C72 H72 120.5 . . ?
C73 C72 H72 120.5 . . ?
C74 C73 C72 123.1(11) . . ?
C74 C73 H73 118.4 . . ?
C72 C73 H73 118.5 . . ?
C75 C74 C73 116.3(9) . . ?
C75 C74 C77 121.4(12) . . ?
C73 C74 C77 122.2(11) . . ?
C74 C75 C76 123.0(10) . . ?
C74 C75 H75 118.5 . . ?
C76 C75 H75 118.5 . . ?
C71 C76 C75 120.5(8) . . ?
C71 C76 H76 119.7 . . ?
C75 C76 H76 119.7 . . ?
C79 C77 C80 122.2(18) . . ?
C79 C77 C74 110.7(13) . . ?
C80 C77 C74 112.1(11) . . ?
C79 C77 C78 105.8(15) . . ?
C80 C77 C78 99.4(15) . . ?
C74 C77 C78 104.2(13) . . ?
C77 C78 H78 109.6 . . ?
C77 C78 H78A 109.5 . . ?
H78 C78 H78A 109.5 . . ?
C77 C78 H78B 109.3 . . ?
H78 C78 H78B 109.5 . . ?
H78A C78 H78B 109.5 . . ?
C77 C79 H79 109.6 . . ?
C77 C79 H79A 109.6 . . ?
H79 C79 H79A 109.5 . . ?
C77 C79 H79B 109.3 . . ?
H79 C79 H79B 109.5 . . ?
H79A C79 H79B 109.5 . . ?
C77 C80 H80 109.5 . . ?
C77 C80 H80A 109.5 . . ?
H80 C80 H80A 109.5 . . ?
C77 C80 H80B 109.4 . . ?
H80 C80 H80B 109.5 . . ?
H80A C80 H80B 109.5 . . ?
C82 C81 C89 121.2(7) . . ?
C82 C81 C61 124.0(7) . . ?
C89 C81 C61 114.5(7) . . ?
C81 C82 C83 119.2(8) . . ?
C81 C82 S5 121.9(6) . . ?
C83 C82 S5 118.8(6) . . ?
C84 C83 C82 117.8(9) . . ?
C84 C83 C91 117.9(9) . . ?
C82 C83 C91 124.3(10) . . ?
C83 C84 C90 126.4(9) . . ?
C83 C84 H84 116.8 . . ?
C90 C84 H84 116.7 . . ?
C90 C85 C86 119.1(11) . . ?
C90 C85 H85 120.5 . . ?
C86 C85 H85 120.4 . . ?
C87 C86 C85 117.7(11) . . ?
C87 C86 H86 121.1 . . ?
C85 C86 H86 121.2 . . ?
C88 C87 C86 124.9(12) . . ?
C88 C87 H87 117.6 . . ?
C86 C87 H87 117.6 . . ?
C87 C88 C89 119.9(9) . . ?
C87 C88 H88 120.0 . . ?
C89 C88 H88 120.1 . . ?
C88 C89 C90 117.9(9) . . ?
C88 C89 C81 123.8(7) . . ?
C90 C89 C81 118.2(9) . . ?
C85 C90 C89 120.3(11) . . ?
C85 C90 C84 122.9(10) . . ?
C89 C90 C84 116.6(9) . . ?
C92 C91 C96 119.0(10) . . ?
C92 C91 C83 119.2(9) . . ?
C96 C91 C83 121.4(9) . . ?
C91 C92 C93 123.2(11) . . ?
C91 C92 H92 118.4 . . ?
C93 C92 H92 118.4 . . ?
C94 C93 C92 117.5(11) . . ?
C94 C93 H93 121.3 . . ?
C92 C93 H93 121.2 . . ?
C95 C94 C93 115.1(10) . . ?
C95 C94 C97 127.2(13) . . ?
C93 C94 C97 117.6(13) . . ?
C94 C95 C96 128.1(11) . . ?
C94 C95 H95 115.9 . . ?
C96 C95 H95 116.0 . . ?
C91 C96 C95 116.8(10) . . ?
C91 C96 H96 121.6 . . ?
C95 C96 H96 121.6 . . ?
C99 C97 C100 88(2) . . ?
C99 C97 C98 110(2) . . ?
C100 C97 C98 118(2) . . ?
C99 C97 C94 118.7(17) . . ?
C100 C97 C94 107.9(19) . . ?
C98 C97 C94 112.5(10) . . ?
C97 C98 H98 109.5 . . ?
C97 C98 H98A 109.7 . . ?
H98 C98 H98A 109.5 . . ?
C97 C98 H98B 109.2 . . ?
H98 C98 H98B 109.5 . . ?
H98A C98 H98B 109.5 . . ?
C97 C99 C100 48.6(16) . . ?
C97 C99 H99 109.6 . . ?
C100 C99 H99 67.0 . . ?
C97 C99 H99A 109.6 . . ?
C100 C99 H99A 146.3 . . ?
H99 C99 H99A 109.2 . . ?
C97 C99 H99B 110.0 . . ?
C100 C99 H99B 103.2 . . ?
H99 C99 H99B 109.2 . . ?
H99A C99 H99B 109.2 . . ?
C97 C100 C99 43.7(14) . . ?
C97 C100 H100 122.9 . . ?
C99 C100 H100 79.2 . . ?
C97 C100 H101 122.2 . . ?
C99 C100 H101 133.2 . . ?
H100 C100 H101 93.7 . . ?
C97 C100 H102 123.6 . . ?
C99 C100 H102 133.3 . . ?
H100 C100 H102 93.2 . . ?
H101 C100 H102 93.0 . . ?
O14 S4 O12 119.1(8) . . ?
O14 S4 O13 107.0(9) . . ?
O12 S4 O13 108.3(8) . . ?
O14 S4 C62 109.2(4) . . ?
O12 S4 C62 107.1(4) . . ?
O13 S4 C62 105.4(5) . . ?
O14 S4 K4 86.7(6) . 2_656 ?
O12 S4 K4 101.7(5) . 2_656 ?
O13 S4 K4 29.3(5) . 2_656 ?
C62 S4 K4 133.3(3) . 2_656 ?
S4 O12 Mg2 128.5(8) . . ?
S4 O13 K4 135.4(8) . 2_656 ?
O16 S5 O17 118.2(4) . . ?
O16 S5 O15 110.4(4) . . ?
O17 S5 O15 111.4(4) . . ?
O16 S5 C82 107.6(3) . . ?
O17 S5 C82 106.3(4) . . ?
O15 S5 C82 101.3(4) . . ?
O16 S5 K4 114.5(3) . . ?
O17 S5 K4 78.1(3) . . ?
O15 S5 K4 37.7(3) . . ?
C82 S5 K4 129.0(3) . . ?
O16 S5 K3 21.5(3) . . ?
O17 S5 K3 115.1(3) . . ?
O15 S5 K3 94.1(3) . . ?
C82 S5 K3 126.2(2) . . ?
K4 S5 K3 93.05(9) . . ?
S5 O15 Mg2 129.2(4) . . ?
S5 O15 K4 122.8(4) . . ?
Mg2 O15 K4 102.8(3) . . ?
S5 O16 K3 146.9(4) . . ?
O18 Mg2 O19 174.9(4) . . ?
O18 Mg2 O15 86.3(3) . . ?
O19 Mg2 O15 92.9(3) . . ?
O18 Mg2 O12 105.3(4) . . ?
O19 Mg2 O12 69.7(4) . . ?
O15 Mg2 O12 91.9(3) . . ?
O18 Mg2 O22 81.3(6) . . ?
O19 Mg2 O22 103.7(6) . . ?
O15 Mg2 O22 87.6(3) . . ?
O12 Mg2 O22 173.4(7) . . ?
O18 Mg2 O22 74.5(4) . 2_656 ?
O19 Mg2 O22 107.4(4) . 2_656 ?
O15 Mg2 O22 156.6(5) . 2_656 ?
O12 Mg2 O22 105.9(4) . 2_656 ?
O22 Mg2 O22 76.5(4) . 2_656 ?
O18 Mg2 Mg2 35.7(3) . 2_656 ?
O19 Mg2 Mg2 148.6(2) . 2_656 ?
O15 Mg2 Mg2 108.3(3) . 2_656 ?
O12 Mg2 Mg2 130.1(4) . 2_656 ?
O22 Mg2 Mg2 56.0(5) . 2_656 ?
O22 Mg2 Mg2 48.4(4) 2_656 2_656 ?
O18 Mg2 K4 75.59(19) . . ?
O19 Mg2 K4 107.2(3) . . ?
O15 Mg2 K4 43.5(2) . . ?
O12 Mg2 K4 135.3(3) . . ?
O22 Mg2 K4 44.7(2) . . ?
O22 Mg2 K4 116.8(4) 2_656 . ?
Mg2 Mg2 K4 76.2(2) 2_656 . ?
O18 Mg2 K4 64.02(17) . 2_656 ?
O19 Mg2 K4 114.4(3) . 2_656 ?
O15 Mg2 K4 141.3(3) . 2_656 ?
O12 Mg2 K4 74.2(3) . 2_656 ?
O22 Mg2 K4 110.1(5) . 2_656 ?
O22 Mg2 K4 38.0(2) 2_656 2_656 ?
Mg2 Mg2 K4 61.5(2) 2_656 2_656 ?
K4 Mg2 K4 136.30(16) . 2_656 ?
Mg2 O18 Mg2 108.6(6) 2_656 . ?
Mg2 O18 K3 125.7(3) 2_656 . ?
Mg2 O18 K3 125.7(3) . . ?
O16 K3 O16 138.9(4) . 2_656 ?
O16 K3 O18 69.5(2) . . ?
O16 K3 O18 69.5(2) 2_656 . ?
O16 K3 S5 130.6(3) . 2_656 ?
O16 K3 S5 11.60(13) 2_656 2_656 ?
O18 K3 S5 62.12(10) . 2_656 ?
O16 K3 S5 11.60(13) . . ?
O16 K3 S5 130.6(3) 2_656 . ?
O18 K3 S5 62.12(10) . . ?
S5 K3 S5 124.2(2) 2_656 . ?
O13 K4 O20 113.4(5) 2_656 . ?
O13 K4 O15 85.8(3) 2_656 . ?
O20 K4 O15 83.1(3) . . ?
O13 K4 O22 84.1(5) 2_656 . ?
O20 K4 O22 146.0(6) . . ?
O15 K4 O22 68.9(3) . . ?
O13 K4 O21 128.5(4) 2_656 . ?
O20 K4 O21 116.7(5) . . ?
O15 K4 O21 89.1(3) . . ?
O22 K4 O21 46.8(4) . . ?
O13 K4 S5 82.4(3) 2_656 . ?
O20 K4 S5 67.5(2) . . ?
O15 K4 S5 19.45(16) . . ?
O22 K4 S5 87.7(3) . . ?
O21 K4 S5 106.2(2) . . ?
O13 K4 S4 15.2(3) 2_656 2_656 ?
O20 K4 S4 123.6(5) . 2_656 ?
O15 K4 S4 98.20(15) . 2_656 ?
O22 K4 S4 80.5(4) . 2_656 ?
O21 K4 S4 119.6(2) . 2_656 ?
S5 K4 S4 97.01(8) . 2_656 ?
O13 K4 Mg2 79.7(3) 2_656 . ?
O20 K4 Mg2 116.0(3) . . ?
O15 K4 Mg2 33.66(18) . . ?
O22 K4 Mg2 35.7(3) . . ?
O21 K4 Mg2 68.7(3) . . ?
S5 K4 Mg2 52.03(10) . . ?
S4 K4 Mg2 85.49(11) 2_656 . ?
O13 K4 Mg2 49.7(3) 2_656 2_656 ?
O20 K4 Mg2 148.1(3) . 2_656 ?
O15 K4 Mg2 69.96(17) . 2_656 ?
O22 K4 Mg2 34.5(4) . 2_656 ?
O21 K4 Mg2 80.5(3) . 2_656 ?
S5 K4 Mg2 82.34(10) . 2_656 ?
S4 K4 Mg2 48.10(9) 2_656 2_656 ?
Mg2 K4 Mg2 42.34(16) . 2_656 ?
O21 S6 O23 114.7(15) . . ?
O21 S6 O22 113.5(5) . . ?
O23 S6 O22 106.6(12) . . ?
O21 S6 C102 106.2(6) . . ?
O23 S6 C102 107.4(6) . . ?
O22 S6 C102 108.1(11) . . ?
S6 O21 K4 97.1(5) . . ?
S6 O22 Mg2 111.5(12) . . ?
S6 O22 Mg2 147.6(6) . 2_656 ?
Mg2 O22 Mg2 75.6(4) . 2_656 ?
S6 O22 K4 102.4(6) . . ?
Mg2 O22 K4 99.6(4) . . ?
Mg2 O22 K4 107.5(5) 2_656 . ?
C102 C101 C109 124.5(11) . . ?
C102 C101 C101 123.3(16) . 2_656 ?
C109 C101 C101 111.9(11) . 2_656 ?
C101 C102 C103 115.5(14) . . ?
C101 C102 S6 123.0(9) . . ?
C103 C102 S6 120.4(9) . . ?
C104 C103 C111 119.0(10) . . ?
C104 C103 C102 118.9(10) . . ?
C111 C103 C102 121.7(13) . . ?
C103 C104 C110 122.7(11) . . ?
C103 C104 H104 118.7 . . ?
C110 C104 H104 118.6 . . ?
C106 C105 C110 117.5(15) . . ?
C106 C105 H105 121.3 . . ?
C110 C105 H105 121.2 . . ?
C105 C106 C107 121.0(17) . . ?
C105 C106 H106 119.5 . . ?
C107 C106 H106 119.5 . . ?
C108 C107 C106 123.4(14) . . ?
C108 C107 H107 118.2 . . ?
C106 C107 H107 118.3 . . ?
C107 C108 C109 118.4(14) . . ?
C107 C108 H108 120.8 . . ?
C109 C108 H108 120.7 . . ?
C110 C109 C101 116.4(11) . . ?
C110 C109 C108 120.4(15) . . ?
C101 C109 C108 123.1(13) . . ?
C109 C110 C104 121.4(15) . . ?
C109 C110 C105 119.2(12) . . ?
C104 C110 C105 119.3(12) . . ?
C112 C111 C116 115.9(10) . . ?
C112 C111 C103 122.8(10) . . ?
C116 C111 C103 121.0(10) . . ?
C111 C112 C113 120.7(10) . . ?
C111 C112 H112 119.6 . . ?
C113 C112 H112 119.6 . . ?
C114 C113 C112 122.6(10) . . ?
C114 C113 H113 118.7 . . ?
C112 C113 H113 118.7 . . ?
C115 C114 C113 115.9(9) . . ?
C115 C114 C117 124.6(9) . . ?
C113 C114 C117 119.4(8) . . ?
C114 C115 C116 124.2(10) . . ?
C114 C115 H115 117.9 . . ?
C116 C115 H115 117.9 . . ?
C115 C116 C111 120.2(11) . . ?
C115 C116 H116 119.9 . . ?
C111 C116 H116 119.9 . . ?
C118 C117 C120 107.2(16) . . ?
C118 C117 C114 112.9(10) . . ?
C120 C117 C114 108.9(10) . . ?
C118 C117 C119 111.1(15) . . ?
C120 C117 C119 105.6(13) . . ?
C114 C117 C119 110.8(8) . . ?
C117 C118 H118 109.3 . . ?
C117 C118 H119 109.5 . . ?
H118 C118 H119 109.5 . . ?
C117 C118 H120 109.6 . . ?
H118 C118 H120 109.5 . . ?
H119 C118 H120 109.5 . . ?
C117 C119 H121 109.5 . . ?
C117 C119 H122 109.5 . . ?
H121 C119 H122 109.5 . . ?
C117 C119 H123 109.5 . . ?
H121 C119 H123 109.5 . . ?
H122 C119 H123 109.5 . . ?
C117 C120 H124 109.5 . . ?
C117 C120 H125 109.4 . . ?
H124 C120 H125 109.5 . . ?
C117 C120 H126 109.5 . . ?
H124 C120 H126 109.5 . . ?
H125 C120 H126 109.5 . . ?
 
loop_
 _geom_torsion_atom_site_label_1
 _geom_torsion_atom_site_label_2
 _geom_torsion_atom_site_label_3
 _geom_torsion_atom_site_label_4
 _geom_torsion
 _geom_torsion_site_symmetry_1
 _geom_torsion_site_symmetry_2
 _geom_torsion_site_symmetry_3
 _geom_torsion_site_symmetry_4
 _geom_torsion_publ_flag
C9 C1 C2 C3 -9.3(14) . . . . ?
C21 C1 C2 C3 -178.0(8) . . . . ?
C9 C1 C2 S1 176.3(8) . . . . ?
C21 C1 C2 S1 7.6(13) . . . . ?
C1 C2 C3 C4 7.4(13) . . . . ?
S1 C2 C3 C4 -177.9(8) . . . . ?
C1 C2 C3 C11 -179.0(9) . . . . ?
S1 C2 C3 C11 -4.3(12) . . . . ?
C2 C3 C4 C10 -4.1(17) . . . . ?
C11 C3 C4 C10 -178.5(11) . . . . ?
C10 C5 C6 C7 3(3) . . . . ?
C5 C6 C7 C8 -2(3) . . . . ?
C6 C7 C8 C9 2(2) . . . . ?
C2 C1 C9 C8 -176.0(10) . . . . ?
C21 C1 C9 C8 -6.2(15) . . . . ?
C2 C1 C9 C10 7.4(15) . . . . ?
C21 C1 C9 C10 177.1(9) . . . . ?
C7 C8 C9 C1 -178.6(11) . . . . ?
C7 C8 C9 C10 -2.0(16) . . . . ?
C3 C4 C10 C9 2.5(19) . . . . ?
C3 C4 C10 C5 178.8(12) . . . . ?
C1 C9 C10 C4 -4.0(16) . . . . ?
C8 C9 C10 C4 179.1(11) . . . . ?
C1 C9 C10 C5 179.3(11) . . . . ?
C8 C9 C10 C5 2.4(16) . . . . ?
C6 C5 C10 C4 -179.2(17) . . . . ?
C6 C5 C10 C9 -3(2) . . . . ?
C4 C3 C11 C16 64.9(13) . . . . ?
C2 C3 C11 C16 -108.8(12) . . . . ?
C4 C3 C11 C12 -108.8(12) . . . . ?
C2 C3 C11 C12 77.5(13) . . . . ?
C16 C11 C12 C13 0.8(17) . . . . ?
C3 C11 C12 C13 174.8(12) . . . . ?
C16 C11 C12 K2 95.7(9) . . . 2 ?
C3 C11 C12 K2 -90.3(10) . . . 2 ?
C11 C12 C13 C14 3(2) . . . . ?
K2 C12 C13 C14 -109.2(14) 2 . . . ?
C12 C13 C14 C15 -6.0(19) . . . . ?
C12 C13 C14 C17 -177.4(13) . . . . ?
C13 C14 C15 C16 5.5(17) . . . . ?
C17 C14 C15 C16 177.6(11) . . . . ?
C12 C11 C16 C15 -1.3(16) . . . . ?
C3 C11 C16 C15 -175.4(10) . . . . ?
C14 C15 C16 C11 -2.0(18) . . . . ?
C13 C14 C17 C20 82(2) . . . . ?
C15 C14 C17 C20 -89.2(17) . . . . ?
C13 C14 C17 C18 -29.9(19) . . . . ?
C15 C14 C17 C18 159.1(13) . . . . ?
C13 C14 C17 C19 -150.2(15) . . . . ?
C15 C14 C17 C19 38.7(17) . . . . ?
C2 C1 C21 C22 -97.0(12) . . . . ?
C9 C1 C21 C22 93.8(10) . . . . ?
C2 C1 C21 C29 86.1(11) . . . . ?
C9 C1 C21 C29 -83.1(11) . . . . ?
C29 C21 C22 C23 1.9(13) . . . . ?
C1 C21 C22 C23 -175.0(8) . . . . ?
C29 C21 C22 S2 -177.4(8) . . . . ?
C1 C21 C22 S2 5.7(12) . . . . ?
C21 C22 C23 C24 -4.1(13) . . . . ?
S2 C22 C23 C24 175.2(7) . . . . ?
C21 C22 C23 C31 176.6(8) . . . . ?
S2 C22 C23 C31 -4.0(12) . . . . ?
C22 C23 C24 C30 3.2(15) . . . . ?
C31 C23 C24 C30 -177.4(9) . . . . ?
C30 C25 C26 C27 7(3) . . . . ?
C25 C26 C27 C28 -3(3) . . . . ?
C26 C27 C28 C29 0(2) . . . . ?
C22 C21 C29 C30 1.2(15) . . . . ?
C1 C21 C29 C30 178.2(10) . . . . ?
C22 C21 C29 C28 179.1(10) . . . . ?
C1 C21 C29 C28 -3.9(15) . . . . ?
C27 C28 C29 C30 0.0(19) . . . . ?
C27 C28 C29 C21 -177.9(12) . . . . ?
C21 C29 C30 C25 -178.3(13) . . . . ?
C28 C29 C30 C25 3.8(19) . . . . ?
C21 C29 C30 C24 -2.2(17) . . . . ?
C28 C29 C30 C24 180.0(11) . . . . ?
C26 C25 C30 C29 -7(3) . . . . ?
C26 C25 C30 C24 176.4(16) . . . . ?
C23 C24 C30 C29 -0.2(17) . . . . ?
C23 C24 C30 C25 176.0(14) . . . . ?
C24 C23 C31 C32 96.1(15) . . . . ?
C22 C23 C31 C32 -84.7(14) . . . . ?
C24 C23 C31 C36 -75.6(13) . . . . ?
C22 C23 C31 C36 103.7(14) . . . . ?
C36 C31 C32 C33 -1.2(19) . . . . ?
C23 C31 C32 C33 -173.1(12) . . . . ?
C31 C32 C33 C34 5(2) . . . . ?
C32 C33 C34 C35 -5(2) . . . . ?
C32 C33 C34 C37 175.1(13) . . . . ?
C33 C34 C35 C36 2(3) . . . . ?
C37 C34 C35 C36 -178.3(16) . . . . ?
C34 C35 C36 C31 2(3) . . . . ?
C34 C35 C36 K2 -93.4(18) . . . . ?
C32 C31 C36 C35 -2(2) . . . . ?
C23 C31 C36 C35 170.4(15) . . . . ?
C32 C31 C36 K2 85.5(11) . . . . ?
C23 C31 C36 K2 -102.1(10) . . . . ?
C33 C34 C37 C40 -79(3) . . . . ?
C35 C34 C37 C40 102(3) . . . . ?
C33 C34 C37 C38 152.9(14) . . . . ?
C35 C34 C37 C38 -27(2) . . . . ?
C33 C34 C37 C39 39(2) . . . . ?
C35 C34 C37 C39 -140.8(18) . . . . ?
C1 C2 S1 O2 -145.4(8) . . . . ?
C3 C2 S1 O2 39.8(9) . . . . ?
C1 C2 S1 O3 -19.9(10) . . . . ?
C3 C2 S1 O3 165.4(8) . . . . ?
C1 C2 S1 O1 96.6(9) . . . . ?
C3 C2 S1 O1 -78.1(8) . . . . ?
C1 C2 S1 K2 147.8(7) . . . 2 ?
C3 C2 S1 K2 -26.9(8) . . . 2 ?
C1 C2 S1 K1 -2.7(10) . . . . ?
C3 C2 S1 K1 -177.5(6) . . . . ?
O2 S1 O1 Mg1 178.5(17) . . . . ?
O3 S1 O1 Mg1 45(2) . . . . ?
C2 S1 O1 Mg1 -67(2) . . . . ?
K2 S1 O1 Mg1 160(2) 2 . . . ?
K1 S1 O1 Mg1 59(2) . . . . ?
O2 S1 O1 K2 18.7(7) . . . 2 ?
O3 S1 O1 K2 -114.5(5) . . . 2 ?
C2 S1 O1 K2 132.8(5) . . . 2 ?
K1 S1 O1 K2 -100.7(4) . . . 2 ?
O3 S1 O2 K2 113.7(5) . . . 2 ?
O1 S1 O2 K2 -17.4(7) . . . 2 ?
C2 S1 O2 K2 -126.5(4) . . . 2 ?
K1 S1 O2 K2 86.8(4) . . . 2 ?
O2 S1 O3 K1 -95.8(14) . . . . ?
O1 S1 O3 K1 35.8(15) . . . . ?
C2 S1 O3 K1 144.0(11) . . . . ?
K2 S1 O3 K1 -24.9(16) 2 . . . ?
C21 C22 S2 O4 99.7(9) . . . . ?
C23 C22 S2 O4 -79.6(9) . . . . ?
C21 C22 S2 O5 -8.1(12) . . . . ?
C23 C22 S2 O5 172.5(10) . . . . ?
C21 C22 S2 O6 -142.5(9) . . . . ?
C23 C22 S2 O6 38.1(9) . . . . ?
C21 C22 S2 K2 146.7(7) . . . . ?
C23 C22 S2 K2 -32.7(8) . . . . ?
O5 S2 O4 Mg1 -1.0(8) . . . . ?
O6 S2 O4 Mg1 127.8(6) . . . . ?
C22 S2 O4 Mg1 -114.5(6) . . . . ?
K2 S2 O4 Mg1 132.5(9) . . . . ?
O5 S2 O4 K2 -133.5(7) . . . . ?
O6 S2 O4 K2 -4.7(8) . . . . ?
C22 S2 O4 K2 113.0(5) . . . . ?
O4 S2 O6 K2 3.7(6) . . . . ?
O5 S2 O6 K2 120.1(6) . . . . ?
C22 S2 O6 K2 -112.1(4) . . . . ?
O11 S3 O9 K2 19.1(8) . . . . ?
O10 S3 O9 K2 -109.7(7) . . . . ?
C42 S3 O9 K2 134.9(6) . . . . ?
K1 S3 O9 K2 -96.5(6) . . . . ?
O11 S3 O10 K1 -88.6(13) . . . . ?
O9 S3 O10 K1 35.8(13) . . . . ?
C42 S3 O10 K1 149.9(10) . . . . ?
C49 C41 C42 C43 -0.5(12) . . . . ?
C41 C41 C42 C43 -173.2(7) 2 . . . ?
C49 C41 C42 S3 179.1(7) . . . . ?
C41 C41 C42 S3 6.4(10) 2 . . . ?
O11 S3 C42 C41 -129.3(8) . . . . ?
O10 S3 C42 C41 -2.4(9) . . . . ?
O9 S3 C42 C41 114.3(8) . . . . ?
K1 S3 C42 C41 11.6(8) . . . . ?
O11 S3 C42 C43 50.3(8) . . . . ?
O10 S3 C42 C43 177.1(7) . . . . ?
O9 S3 C42 C43 -66.1(8) . . . . ?
K1 S3 C42 C43 -168.8(5) . . . . ?
C41 C42 C43 C44 2.2(13) . . . . ?
S3 C42 C43 C44 -177.3(8) . . . . ?
C41 C42 C43 C51 -179.9(8) . . . . ?
S3 C42 C43 C51 0.5(12) . . . . ?
C42 C43 C44 C50 -2.5(18) . . . . ?
C51 C43 C44 C50 179.6(12) . . . . ?
C50 C45 C46 C47 -2(4) . . . . ?
C45 C46 C47 C48 4(4) . . . . ?
C46 C47 C48 C49 -6(3) . . . . ?
C47 C48 C49 C50 5(2) . . . . ?
C47 C48 C49 C41 -178.7(13) . . . . ?
C42 C41 C49 C50 -1.1(15) . . . . ?
C41 C41 C49 C50 172.1(11) 2 . . . ?
C42 C41 C49 C48 -177.1(10) . . . . ?
C41 C41 C49 C48 -4.0(15) 2 . . . ?
C48 C49 C50 C45 -3(2) . . . . ?
C41 C49 C50 C45 -178.8(16) . . . . ?
C48 C49 C50 C44 177.2(14) . . . . ?
C41 C49 C50 C44 1(2) . . . . ?
C46 C45 C50 C49 1(4) . . . . ?
C46 C45 C50 C44 -179(2) . . . . ?
C43 C44 C50 C49 1(2) . . . . ?
C43 C44 C50 C45 -179.4(17) . . . . ?
C44 C43 C51 C52 74.9(13) . . . . ?
C42 C43 C51 C52 -103.0(10) . . . . ?
C44 C43 C51 C56 -97.3(11) . . . . ?
C42 C43 C51 C56 84.9(12) . . . . ?
C56 C51 C52 C53 0.5(14) . . . . ?
C43 C51 C52 C53 -171.5(8) . . . . ?
C51 C52 C53 C54 1.5(15) . . . . ?
C52 C53 C54 C55 -1.4(14) . . . . ?
C52 C53 C54 C57 177.5(9) . . . . ?
C53 C54 C55 C56 -0.5(15) . . . . ?
C57 C54 C55 C56 -179.5(10) . . . . ?
C52 C51 C56 C55 -2.3(14) . . . . ?
C43 C51 C56 C55 169.8(9) . . . . ?
C54 C55 C56 C51 2.3(16) . . . . ?
C53 C54 C57 C60 3.5(16) . . . . ?
C55 C54 C57 C60 -177.6(13) . . . . ?
C53 C54 C57 C59 122.0(11) . . . . ?
C55 C54 C57 C59 -59.1(13) . . . . ?
C53 C54 C57 C58 -119.1(10) . . . . ?
C55 C54 C57 C58 59.8(11) . . . . ?
C69 C61 C62 C63 0.6(10) . . . . ?
C81 C61 C62 C63 -169.1(7) . . . . ?
C69 C61 C62 S4 -179.5(5) . . . . ?
C81 C61 C62 S4 10.8(10) . . . . ?
C61 C62 C63 C64 -3.5(10) . . . . ?
S4 C62 C63 C64 176.6(6) . . . . ?
C61 C62 C63 C71 174.4(7) . . . . ?
S4 C62 C63 C71 -5.5(10) . . . . ?
C62 C63 C64 C70 3.9(11) . . . . ?
C71 C63 C64 C70 -174.2(7) . . . . ?
C70 C65 C66 C67 0.3(16) . . . . ?
C65 C66 C67 C68 -3.4(15) . . . . ?
C66 C67 C68 C69 3.7(12) . . . . ?
C67 C68 C69 C70 -1.0(10) . . . . ?
C67 C68 C69 C61 178.5(7) . . . . ?
C62 C61 C69 C70 2.2(10) . . . . ?
C81 C61 C69 C70 172.9(6) . . . . ?
C62 C61 C69 C68 -177.3(7) . . . . ?
C81 C61 C69 C68 -6.6(10) . . . . ?
C63 C64 C70 C69 -1.1(12) . . . . ?
C63 C64 C70 C65 178.3(8) . . . . ?
C68 C69 C70 C64 177.5(7) . . . . ?
C61 C69 C70 C64 -1.9(10) . . . . ?
C68 C69 C70 C65 -1.9(10) . . . . ?
C61 C69 C70 C65 178.6(7) . . . . ?
C66 C65 C70 C64 -177.1(9) . . . . ?
C66 C65 C70 C69 2.3(14) . . . . ?
C64 C63 C71 C72 -80.8(15) . . . . ?
C62 C63 C71 C72 101.3(14) . . . . ?
C64 C63 C71 C76 97.7(10) . . . . ?
C62 C63 C71 C76 -80.2(10) . . . . ?
C76 C71 C72 C73 -7(2) . . . . ?
C63 C71 C72 C73 171.5(15) . . . . ?
C71 C72 C73 C74 6(3) . . . . ?
C72 C73 C74 C75 -2(3) . . . . ?
C72 C73 C74 C77 -178.2(18) . . . . ?
C73 C74 C75 C76 0.7(19) . . . . ?
C77 C74 C75 C76 176.5(12) . . . . ?
C72 C71 C76 C75 5.5(17) . . . . ?
C63 C71 C76 C75 -173.1(9) . . . . ?
C74 C75 C76 C71 -2.3(17) . . . . ?
C75 C74 C77 C79 -121.0(18) . . . . ?
C73 C74 C77 C79 55(2) . . . . ?
C75 C74 C77 C80 19(2) . . . . ?
C73 C74 C77 C80 -165.2(18) . . . . ?
C75 C74 C77 C78 125.7(13) . . . . ?
C73 C74 C77 C78 -58.7(19) . . . . ?
C62 C61 C81 C82 -100.1(10) . . . . ?
C69 C61 C81 C82 89.7(9) . . . . ?
C62 C61 C81 C89 85.7(9) . . . . ?
C69 C61 C81 C89 -84.5(8) . . . . ?
C89 C81 C82 C83 3.5(11) . . . . ?
C61 C81 C82 C83 -170.3(7) . . . . ?
C89 C81 C82 S5 -178.9(6) . . . . ?
C61 C81 C82 S5 7.2(11) . . . . ?
C81 C82 C83 C84 -7.2(12) . . . . ?
S5 C82 C83 C84 175.1(7) . . . . ?
C81 C82 C83 C91 172.1(8) . . . . ?
S5 C82 C83 C91 -5.5(10) . . . . ?
C82 C83 C84 C90 9.8(15) . . . . ?
C91 C83 C84 C90 -169.6(9) . . . . ?
C90 C85 C86 C87 -3(2) . . . . ?
C85 C86 C87 C88 0(2) . . . . ?
C86 C87 C88 C89 1.0(16) . . . . ?
C87 C88 C89 C90 1.5(13) . . . . ?
C87 C88 C89 C81 177.6(9) . . . . ?
C82 C81 C89 C88 -177.9(8) . . . . ?
C61 C81 C89 C88 -3.5(11) . . . . ?
C82 C81 C89 C90 -1.9(12) . . . . ?
C61 C81 C89 C90 172.5(7) . . . . ?
C86 C85 C90 C89 5.8(18) . . . . ?
C86 C85 C90 C84 -179.1(12) . . . . ?
C88 C89 C90 C85 -4.9(14) . . . . ?
C81 C89 C90 C85 178.8(10) . . . . ?
C88 C89 C90 C84 179.7(9) . . . . ?
C81 C89 C90 C84 3.4(13) . . . . ?
C83 C84 C90 C85 176.7(11) . . . . ?
C83 C84 C90 C89 -8.0(16) . . . . ?
C84 C83 C91 C92 85.0(17) . . . . ?
C82 C83 C91 C92 -94.3(16) . . . . ?
C84 C83 C91 C96 -87.9(13) . . . . ?
C82 C83 C91 C96 92.8(13) . . . . ?
C96 C91 C92 C93 4(3) . . . . ?
C83 C91 C92 C93 -169.2(18) . . . . ?
C91 C92 C93 C94 -5(3) . . . . ?
C92 C93 C94 C95 1(3) . . . . ?
C92 C93 C94 C97 -180(2) . . . . ?
C93 C94 C95 C96 3(3) . . . . ?
C97 C94 C95 C96 -176(2) . . . . ?
C92 C91 C96 C95 0(2) . . . . ?
C83 C91 C96 C95 173.1(13) . . . . ?
C94 C95 C96 C91 -4(3) . . . . ?
C95 C94 C97 C99 -167(3) . . . . ?
C93 C94 C97 C99 14(3) . . . . ?
C95 C94 C97 C100 96(3) . . . . ?
C93 C94 C97 C100 -83(3) . . . . ?
C95 C94 C97 C98 -37(3) . . . . ?
C93 C94 C97 C98 144(2) . . . . ?
C98 C97 C99 C100 119(2) . . . . ?
C94 C97 C99 C100 -109(2) . . . . ?
C98 C97 C100 C99 -111(2) . . . . ?
C94 C97 C100 C99 119.5(18) . . . . ?
C63 C62 S4 O14 66.3(9) . . . . ?
C61 C62 S4 O14 -113.6(9) . . . . ?
C63 C62 S4 O12 -163.5(8) . . . . ?
C61 C62 S4 O12 16.7(9) . . . . ?
C63 C62 S4 O13 -48.3(8) . . . . ?
C61 C62 S4 O13 131.8(8) . . . . ?
C63 C62 S4 K4 -37.9(7) . . . 2_656 ?
C61 C62 S4 K4 142.2(5) . . . 2_656 ?
O14 S4 O12 Mg2 -124.9(9) . . . . ?
O13 S4 O12 Mg2 -2.5(9) . . . . ?
C62 S4 O12 Mg2 110.7(6) . . . . ?
K4 S4 O12 Mg2 -32.2(7) 2_656 . . . ?
O14 S4 O13 K4 48.3(11) . . . 2_656 ?
O12 S4 O13 K4 -81.2(11) . . . 2_656 ?
C62 S4 O13 K4 164.4(8) . . . 2_656 ?
C81 C82 S5 O16 -0.1(8) . . . . ?
C83 C82 S5 O16 177.4(6) . . . . ?
C81 C82 S5 O17 -127.7(7) . . . . ?
C83 C82 S5 O17 49.9(7) . . . . ?
C81 C82 S5 O15 115.8(7) . . . . ?
C83 C82 S5 O15 -66.7(6) . . . . ?
C81 C82 S5 K4 144.6(5) . . . . ?
C83 C82 S5 K4 -37.8(7) . . . . ?
C81 C82 S5 K3 12.1(8) . . . . ?
C83 C82 S5 K3 -170.4(5) . . . . ?
O16 S5 O15 Mg2 46.2(6) . . . . ?
O17 S5 O15 Mg2 179.7(5) . . . . ?
C82 S5 O15 Mg2 -67.6(6) . . . . ?
K4 S5 O15 Mg2 150.2(8) . . . . ?
K3 S5 O15 Mg2 60.6(5) . . . . ?
O16 S5 O15 K4 -104.0(4) . . . . ?
O17 S5 O15 K4 29.5(6) . . . . ?
C82 S5 O15 K4 142.2(4) . . . . ?
K3 S5 O15 K4 -89.6(3) . . . . ?
O17 S5 O16 K3 -87.4(8) . . . . ?
O15 S5 O16 K3 42.6(8) . . . . ?
C82 S5 O16 K3 152.3(6) . . . . ?
K4 S5 O16 K3 1.9(8) . . . . ?
O15 Mg2 O18 Mg2 -129.1(3) . . . 2_656 ?
O12 Mg2 O18 Mg2 140.0(4) . . . 2_656 ?
O22 Mg2 O18 Mg2 -41.0(3) . . . 2_656 ?
O22 Mg2 O18 Mg2 37.3(3) 2_656 . . 2_656 ?
K4 Mg2 O18 Mg2 -86.31(14) . . . 2_656 ?
K4 Mg2 O18 Mg2 76.53(18) 2_656 . . 2_656 ?
O15 Mg2 O18 K3 50.9(3) . . . . ?
O12 Mg2 O18 K3 -40.0(4) . . . . ?
O22 Mg2 O18 K3 139.0(3) . . . . ?
O22 Mg2 O18 K3 -142.7(3) 2_656 . . . ?
Mg2 Mg2 O18 K3 180.000(1) 2_656 . . . ?
K4 Mg2 O18 K3 93.69(14) . . . . ?
K4 Mg2 O18 K3 -103.46(18) 2_656 . . . ?
O23 S6 O21 K4 119.2(7) . . . . ?
O22 S6 O21 K4 -3.8(10) . . . . ?
C102 S6 O21 K4 -122.3(6) . . . . ?
O21 S6 O22 Mg2 109.8(6) . . . . ?
O23 S6 O22 Mg2 -17.5(11) . . . . ?
C102 S6 O22 Mg2 -132.8(6) . . . . ?
O21 S6 O22 Mg2 -153.3(15) . . . 2_656 ?
O23 S6 O22 Mg2 79(2) . . . 2_656 ?
C102 S6 O22 Mg2 -35.8(19) . . . 2_656 ?
O21 S6 O22 K4 4.1(11) . . . . ?
O23 S6 O22 K4 -123.2(10) . . . . ?
C102 S6 O22 K4 121.6(6) . . . . ?
C109 C101 C102 C103 -6(2) . . . . ?
C101 C101 C102 C103 179.9(13) 2_656 . . . ?
C109 C101 C102 S6 -173.8(13) . . . . ?
C101 C101 C102 S6 12(2) 2_656 . . . ?
O21 S6 C102 C101 -145.4(14) . . . . ?
O23 S6 C102 C101 -22(2) . . . . ?
O22 S6 C102 C101 92.5(15) . . . . ?
O21 S6 C102 C103 47.4(16) . . . . ?
O23 S6 C102 C103 170.6(17) . . . . ?
O22 S6 C102 C103 -74.7(14) . . . . ?
C101 C102 C103 C104 9(2) . . . . ?
S6 C102 C103 C104 177.2(12) . . . . ?
C101 C102 C103 C111 -178.5(12) . . . . ?
S6 C102 C103 C111 -10.4(19) . . . . ?
C111 C103 C104 C110 -179.9(13) . . . . ?
C102 C103 C104 C110 -7(2) . . . . ?
C110 C105 C106 C107 1(2) . . . . ?
C105 C106 C107 C108 2(3) . . . . ?
C106 C107 C108 C109 -3(2) . . . . ?
C102 C101 C109 C110 1(2) . . . . ?
C101 C101 C109 C110 175.4(15) 2_656 . . . ?
C102 C101 C109 C108 -175.6(14) . . . . ?
C101 C101 C109 C108 -1(2) 2_656 . . . ?
C107 C108 C109 C110 1(2) . . . . ?
C107 C108 C109 C101 177.5(14) . . . . ?
C101 C109 C110 C104 2(2) . . . . ?
C108 C109 C110 C104 178.2(14) . . . . ?
C101 C109 C110 C105 -174.7(14) . . . . ?
C108 C109 C110 C105 2(2) . . . . ?
C103 C104 C110 C109 2(2) . . . . ?
C103 C104 C110 C105 178.2(14) . . . . ?
C106 C105 C110 C109 -3(2) . . . . ?
C106 C105 C110 C104 -179.6(15) . . . . ?
C104 C103 C111 C112 77.5(18) . . . . ?
C102 C103 C111 C112 -94.9(14) . . . . ?
C104 C103 C111 C116 -95.3(14) . . . . ?
C102 C103 C111 C116 92.3(17) . . . . ?
C116 C111 C112 C113 -2.5(18) . . . . ?
C103 C111 C112 C113 -175.6(13) . . . . ?
C111 C112 C113 C114 -4(2) . . . . ?
C112 C113 C114 C115 6.6(17) . . . . ?
C112 C113 C114 C117 -175.8(11) . . . . ?
C113 C114 C115 C116 -3.0(16) . . . . ?
C117 C114 C115 C116 179.6(11) . . . . ?
C114 C115 C116 C111 -3.3(19) . . . . ?
C112 C111 C116 C115 5.9(18) . . . . ?
C103 C111 C116 C115 179.2(12) . . . . ?
C115 C114 C117 C118 -130.0(16) . . . . ?
C113 C114 C117 C118 52.7(18) . . . . ?
C115 C114 C117 C120 111.0(15) . . . . ?
C113 C114 C117 C120 -66.3(16) . . . . ?
C115 C114 C117 C119 -4.7(15) . . . . ?
C113 C114 C117 C119 178.0(12) . . . . ?
 
_refine_diff_density_max    0.776
_refine_diff_density_min   -0.527
_refine_diff_density_rms    0.085

_shelxl_version_number 2014/6

_shelx_res_file
;
TITL
REM  Yadorkari-X generated
CELL 0.71075 19.2610 25.2800 32.3870 90.0000 104.0250 90.0000
ZERR 4.0 0.0020 0.0030 0.0040 0.0000 0.0020 0.0000
LATT -7
SYMM -X, +Y, -Z

REM  SPGR C2 monoclinic
SFAC C H O Mg S K
UNIT 480 432 86 6 24 14
SIZE 0.30 0.30 0.20
TEMP -150.0
L.S. 5
FMAP 2
PLAN -25
ACTA
CONF
LIST 4
WPDB -1
BOND $H

FREE K4 S6
FREE K4 C116
FREE K4 C115

WGHT    0.100000
FVAR       1.38044
C1    1    0.125593    0.379777   -0.093909    11.00000    0.09260    0.10584 =
         0.06606    0.02409    0.01498   -0.04286
C2    1    0.053600    0.371011   -0.109591    11.00000    0.08914    0.10972 =
         0.04964    0.02977    0.01660   -0.00852
C3    1    0.004979    0.413078   -0.125268    11.00000    0.12316    0.09050 =
         0.04566    0.00580    0.01879   -0.00781
C4    1    0.033897    0.460632   -0.128506    11.00000    0.13110    0.07621 =
         0.10621    0.00369   -0.02545   -0.03644
AFIX  43
H4    2    0.002450    0.488504   -0.140648    11.00000   -1.20000
AFIX   0
C5    1    0.139649    0.523174   -0.119250    11.00000    0.14256    0.11653 =
         0.12878    0.00131   -0.03162    0.00642
AFIX  43
H5    2    0.109189    0.551524   -0.131503    11.00000   -1.20000
AFIX   0
C6    1    0.207053    0.533272   -0.107410    11.00000    0.16444    0.11696 =
         0.14295    0.05669   -0.06943   -0.05684
AFIX  43
H6    2    0.225220    0.567798   -0.109716    11.00000   -1.20000
AFIX   0
C7    1    0.247925    0.495178   -0.092590    11.00000    0.13784    0.22976 =
         0.07766    0.02254   -0.01189   -0.10683
AFIX  43
H7    2    0.297595    0.503160   -0.084919    11.00000   -1.20000
AFIX   0
C8    1    0.229582    0.441974   -0.085848    11.00000    0.12808    0.14810 =
         0.07467    0.01817    0.00361   -0.07791
AFIX  43
H8    2    0.264693    0.416377   -0.073658    11.00000   -1.20000
AFIX   0
C9    1    0.154182    0.429126   -0.098670    11.00000    0.13497    0.11306 =
         0.05711    0.01536    0.00610   -0.00736
C10   1    0.105169    0.472045   -0.115666    11.00000    0.16147    0.05705 =
         0.10089    0.01548   -0.01040   -0.03745
C11   1   -0.071849    0.409977   -0.142057    11.00000    0.07889    0.09594 =
         0.05799   -0.01081    0.00949    0.00099
C12   1   -0.120011    0.404964   -0.115863    11.00000    0.11329    0.16596 =
         0.04041   -0.00335    0.01096    0.00716
AFIX  43
H12   2   -0.102183    0.400559   -0.086039    11.00000   -1.20000
AFIX   0
C13   1   -0.192478    0.406373   -0.132958    11.00000    0.08829    0.18992 =
         0.06823   -0.02975    0.02142   -0.00461
AFIX  43
H13   2   -0.223041    0.404644   -0.113962    11.00000   -1.20000
AFIX   0
C14   1   -0.222691    0.409990   -0.174260    11.00000    0.10195    0.10418 =
         0.10134   -0.03533    0.02861    0.01077
C15   1   -0.174038    0.417583   -0.199405    11.00000    0.14048    0.11306 =
         0.07294   -0.01233    0.02833    0.01740
AFIX  43
H15   2   -0.192106    0.423652   -0.229015    11.00000   -1.20000
AFIX   0
C16   1   -0.101141    0.416669   -0.183238    11.00000    0.07244    0.11661 =
         0.07776    0.00718    0.00126   -0.00416
AFIX  43
H16   2   -0.070772    0.420965   -0.202144    11.00000   -1.20000
AFIX   0
C17   1   -0.302389    0.413893   -0.194990    11.00000    0.08776    0.10382 =
         0.14292   -0.01608    0.01981    0.01391
C18   1   -0.343637    0.387120   -0.169880    11.00000    0.14616    0.24516 =
         0.18965   -0.09843    0.02349    0.00058
AFIX 137
H18   2   -0.331699    0.349372   -0.168301    11.00000   -1.50000
H18A  2   -0.394737    0.391596   -0.183082    11.00000   -1.50000
H18B  2   -0.332612    0.402128   -0.141126    11.00000   -1.50000
AFIX   0
C19   1   -0.325474    0.390638   -0.239017    11.00000    0.08395    0.22278 =
         0.12719   -0.04024   -0.00496    0.01185
AFIX 137
H19   2   -0.324643    0.351945   -0.237111    11.00000   -1.50000
H19A  2   -0.292684    0.402318   -0.256076    11.00000   -1.50000
H19B  2   -0.374112    0.402523   -0.252507    11.00000   -1.50000
AFIX   0
C20   1   -0.326361    0.467279   -0.193636    11.00000    0.11179    0.13204 =
         0.31799   -0.03617    0.00801    0.03116
AFIX 137
H20   2   -0.296358    0.490805   -0.206006    11.00000   -1.50000
H20A  2   -0.322932    0.477511   -0.164023    11.00000   -1.50000
H20B  2   -0.376215    0.470093   -0.209951    11.00000   -1.50000
AFIX   0
C21   1    0.180762    0.336751   -0.078011    11.00000    0.07846    0.12101 =
         0.06721    0.03230    0.01780   -0.03381
C22   1    0.204176    0.324259   -0.035561    11.00000    0.04906    0.11026 =
         0.08858    0.03296    0.01869   -0.00301
C23   1    0.261447    0.285754   -0.020867    11.00000    0.07378    0.12365 =
         0.08252    0.00454    0.03723   -0.04123
C24   1    0.287551    0.260323   -0.050473    11.00000    0.09692    0.11564 =
         0.09576    0.03667    0.02441    0.00289
AFIX  43
H24   2    0.323041    0.233823   -0.041722    11.00000   -1.20000
AFIX   0
C25   1    0.294250    0.247566   -0.125712    11.00000    0.18854    0.23658 =
         0.11221    0.05427    0.09281    0.06892
AFIX  43
H25   2    0.333670    0.224385   -0.116071    11.00000   -1.20000
AFIX   0
C26   1    0.268636    0.256386   -0.169111    11.00000    0.14539    0.19689 =
         0.20196   -0.02415    0.10174   -0.02200
AFIX  43
H26   2    0.286879    0.236312   -0.188934    11.00000   -1.20000
AFIX   0
C27   1    0.216899    0.294140   -0.183427    11.00000    0.17675    0.17867 =
         0.12489    0.03316    0.10920    0.02561
AFIX  43
H27   2    0.201251    0.301332   -0.213020    11.00000   -1.20000
AFIX   0
C28   1    0.186816    0.322416   -0.153955    11.00000    0.14925    0.18367 =
         0.08559   -0.00971    0.05924   -0.01677
AFIX  43
H28   2    0.151269    0.348677   -0.163502    11.00000   -1.20000
AFIX   0
C29   1    0.211814    0.310159   -0.108704    11.00000    0.12372    0.11935 =
         0.08339    0.02849    0.04688   -0.01450
C30   1    0.262543    0.272597   -0.095490    11.00000    0.12010    0.12222 =
         0.13718   -0.00574    0.05315   -0.02659
C31   1    0.293800    0.270908    0.023171    11.00000    0.05368    0.11970 =
         0.10470    0.04040    0.00311   -0.03594
C32   1    0.346923    0.296967    0.049093    11.00000    0.09645    0.09933 =
         0.15852    0.02626    0.03171   -0.03413
AFIX  43
H32   2    0.362048    0.329621    0.039671    11.00000   -1.20000
AFIX   0
C33   1    0.383039    0.277767    0.091299    11.00000    0.09084    0.13690 =
         0.10724    0.04704   -0.01999   -0.01366
AFIX  43
H33   2    0.418003    0.299216    0.109496    11.00000   -1.20000
AFIX   0
C34   1    0.367035    0.229526    0.104719    11.00000    0.05779    0.13362 =
         0.11415    0.04118    0.00344   -0.01735
C35   1    0.312022    0.202355    0.078537    11.00000    0.13187    0.18140 =
         0.16281    0.08213   -0.01217   -0.01494
AFIX  43
H35   2    0.298781    0.168992    0.087759    11.00000   -1.20000
AFIX   0
C36   1    0.274435    0.221463    0.038847    11.00000    0.09277    0.19827 =
         0.11479    0.07754   -0.02636   -0.08595
AFIX  43
H36   2    0.235857    0.201522    0.022210    11.00000   -1.20000
AFIX   0
C37   1    0.407710    0.206005    0.147356    11.00000    0.08819    0.17563 =
         0.11368    0.06264   -0.00504    0.01719
C38   1    0.362047    0.168553    0.164037    11.00000    0.21165    0.09961 =
         0.09891    0.00934    0.02083    0.01394
AFIX 137
H38   2    0.358049    0.135312    0.148063    11.00000   -1.50000
H38A  2    0.314338    0.183926    0.160885    11.00000   -1.50000
H38B  2    0.383528    0.161630    0.194203    11.00000   -1.50000
AFIX   0
C39   1    0.426112    0.248667    0.182980    11.00000    0.30546    0.17532 =
         0.12160    0.00840   -0.03906   -0.06891
AFIX 137
H39   2    0.451350    0.278129    0.173401    11.00000   -1.50000
H39A  2    0.456720    0.233042    0.208722    11.00000   -1.50000
H39B  2    0.381852    0.261696    0.189252    11.00000   -1.50000
AFIX   0
C40   1    0.474804    0.185607    0.141370    11.00000    0.18118    0.74903 =
         0.28652    0.36341    0.08326    0.22553
AFIX 137
H40   2    0.499325    0.213281    0.129130    11.00000   -1.50000
H40A  2    0.465464    0.155204    0.122041    11.00000   -1.50000
H40B  2    0.505050    0.174526    0.168886    11.00000   -1.50000
AFIX   0
S1    5    0.015052    0.307193   -0.107087    11.00000    0.07737    0.12070 =
         0.14219    0.06393    0.02418   -0.01778
O1    3   -0.012001    0.313849   -0.066342    11.00000    0.16233    0.26493 =
         0.10960    0.05514    0.04208   -0.06823
O2    3   -0.039818    0.301102   -0.143116    11.00000    0.11750    0.08147 =
         0.13915    0.00934   -0.00572   -0.01140
O3    3    0.070515    0.270771   -0.101570    11.00000    0.07901    0.09605 =
         0.31850    0.09942    0.00793   -0.00535
S2    5    0.166259    0.353181    0.003868    11.00000    0.06028    0.15030 =
         0.06235    0.02364    0.01611   -0.01109
O4    3    0.119821    0.317285    0.012366    11.00000    0.18106    0.22220 =
         0.11226   -0.03597    0.09515   -0.07816
O5    3    0.120937    0.392151   -0.014194    11.00000    0.25232    0.38319 =
         0.07723    0.09911    0.08625    0.22554
O6    3    0.221132    0.362441    0.041209    11.00000    0.07918    0.20919 =
         0.12750   -0.06069   -0.00403    0.00663
MG1   4    0.000000    0.323911    0.000000    10.50000    0.11982    0.09075 =
         0.12064    0.00000    0.01921    0.00000
O7    3    0.000000    0.411557    0.000000    10.50000    0.10442    0.10145 =
         0.20474    0.00000    0.04045    0.00000
O8    3    0.000000    0.243888    0.000000    10.50000    0.48683    0.10960 =
         0.30887    0.00000   -0.38891    0.00000
K1    6    0.113963    0.187082   -0.065748    11.00000    0.33033    0.23267 =
         0.39420    0.11289    0.07137    0.01898
K2    6    0.157157    0.271743    0.095535    11.00000    0.11502    0.24279 =
         0.06405   -0.00601   -0.01215   -0.00867
S3    5    0.109122    0.137540    0.042224    11.00000    0.11661    0.05114 =
         0.05668    0.00579    0.01520   -0.01416
O9    3    0.086751    0.189232    0.053531    11.00000    0.30747    0.03680 =
         0.18956    0.02237    0.13819    0.00329
O10   3    0.102316    0.135287   -0.002470    11.00000    0.19287    0.15341 =
         0.05764   -0.02758    0.03486   -0.08328
O11   3    0.176752    0.125911    0.068421    11.00000    0.09546    0.17552 =
         0.11161    0.07093   -0.03016   -0.04601
C41   1   -0.001271    0.062529    0.023581    11.00000    0.07764    0.04954 =
         0.04072    0.01108    0.00088    0.00214
C42   1    0.045826    0.091614    0.054663    11.00000    0.08844    0.05502 =
         0.04949    0.01089    0.01493    0.01107
C43   1    0.046400    0.085989    0.098438    11.00000    0.10760    0.06775 =
         0.03316    0.01011   -0.00374   -0.01629
C44   1    0.001812    0.050345    0.109546    11.00000    0.13876    0.11743 =
         0.04773    0.01147   -0.00175   -0.06745
AFIX  43
H44   2    0.003118    0.045296    0.138791    11.00000   -1.20000
AFIX   0
C45   1   -0.093060   -0.016015    0.090511    11.00000    0.28610    0.30879 =
         0.06188    0.00102    0.02558   -0.24255
AFIX  43
H45   2   -0.092554   -0.020159    0.119736    11.00000   -1.20000
AFIX   0
C46   1   -0.136700   -0.044178    0.061955    11.00000    0.28485    0.36027 =
         0.06644    0.02336   -0.00644   -0.24050
AFIX  43
H46   2   -0.166554   -0.069256    0.071089    11.00000   -1.20000
AFIX   0
C47   1   -0.141509   -0.039024    0.018076    11.00000    0.18492    0.13882 =
         0.07661   -0.00766   -0.01458   -0.11516
AFIX  43
H47   2   -0.175760   -0.058272   -0.002485    11.00000   -1.20000
AFIX   0
C48   1   -0.096092   -0.006140    0.006927    11.00000    0.15874    0.08199 =
         0.05650    0.00284   -0.00856   -0.05689
AFIX  43
H48   2   -0.095242   -0.004471   -0.022250    11.00000   -1.20000
AFIX   0
C49   1   -0.049047    0.026456    0.035763    11.00000    0.11357    0.09508 =
         0.04761   -0.00355    0.00044   -0.02709
C50   1   -0.046841    0.020357    0.078448    11.00000    0.17932    0.16715 =
         0.04467    0.02727   -0.01648   -0.09669
C51   1    0.096684    0.116601    0.135359    11.00000    0.11722    0.06260 =
         0.04710    0.00285    0.01694   -0.01833
C52   1    0.153922    0.092694    0.160107    11.00000    0.08941    0.05395 =
         0.06852   -0.01929    0.00197    0.00507
AFIX  43
H52   2    0.167440    0.058492    0.152736    11.00000   -1.20000
AFIX   0
C53   1    0.192458    0.116783    0.195368    11.00000    0.06486    0.08273 =
         0.07290   -0.02403    0.01424    0.01870
AFIX  43
H53   2    0.233380    0.099072    0.211839    11.00000   -1.20000
AFIX   0
C54   1    0.175523    0.165816    0.208754    11.00000    0.08979    0.06040 =
         0.05529   -0.00840    0.01055   -0.01473
C55   1    0.116262    0.190267    0.182963    11.00000    0.13160    0.07028 =
         0.07239   -0.01855    0.00154    0.00572
AFIX  43
H55   2    0.102012    0.224021    0.190841    11.00000   -1.20000
AFIX   0
C56   1    0.076913    0.166420    0.145590    11.00000    0.11548    0.05316 =
         0.06863   -0.00008   -0.00282    0.01014
AFIX  43
H56   2    0.037441    0.184162    0.127655    11.00000   -1.20000
AFIX   0
C57   1    0.216535    0.194248    0.250078    11.00000    0.11628    0.08345 =
         0.06327   -0.03238    0.01343   -0.02149
C58   1    0.164475    0.203547    0.279422    11.00000    0.11850    0.09698 =
         0.06909   -0.02163    0.03089   -0.03713
AFIX 137
H58   2    0.116169    0.210187    0.261881    11.00000   -1.50000
H58A  2    0.180607    0.234178    0.297788    11.00000   -1.50000
H58B  2    0.163893    0.172129    0.297060    11.00000   -1.50000
AFIX   0
C59   1    0.243935    0.248324    0.238654    11.00000    0.17304    0.17171 =
         0.14549   -0.09942    0.08447   -0.11564
AFIX 137
H59   2    0.265699    0.244123    0.214457    11.00000   -1.50000
H59A  2    0.279712    0.262033    0.263175    11.00000   -1.50000
H59B  2    0.203806    0.273174    0.231073    11.00000   -1.50000
AFIX   0
C60   1    0.279949    0.164644    0.273271    11.00000    0.10253    0.34211 =
         0.13384   -0.14425   -0.03751    0.06234
AFIX 137
H60   2    0.310805    0.156851    0.254019    11.00000   -1.50000
H60A  2    0.264722    0.131451    0.284004    11.00000   -1.50000
H60B  2    0.306492    0.185942    0.297214    11.00000   -1.50000
AFIX   0
C61   1    0.311997    0.313282    0.401966    11.00000    0.06475    0.05288 =
         0.06532   -0.00294    0.01915    0.01585
C62   1    0.375162    0.322814    0.388293    11.00000    0.05739    0.06653 =
         0.05242   -0.00821    0.01506   -0.00655
C63   1    0.412972    0.280993    0.376289    11.00000    0.07354    0.07453 =
         0.03964   -0.01511    0.01008    0.00984
C64   1    0.388800    0.230170    0.380472    11.00000    0.08885    0.06192 =
         0.07205   -0.01623    0.03697    0.01878
AFIX  43
H64   2    0.416217    0.201487    0.373988    11.00000   -1.20000
AFIX   0
C65   1    0.302956    0.166149    0.396384    11.00000    0.13076    0.06947 =
         0.10445    0.00064    0.05762    0.00644
AFIX  43
H65   2    0.330780    0.137401    0.390437    11.00000   -1.20000
AFIX   0
C66   1    0.240450    0.156453    0.407524    11.00000    0.11415    0.06981 =
         0.10171   -0.01150    0.05793   -0.01956
AFIX  43
H66   2    0.225187    0.120987    0.409390    11.00000   -1.20000
AFIX   0
C67   1    0.199979    0.196538    0.415934    11.00000    0.07983    0.07017 =
         0.07866    0.00193    0.02887   -0.01452
AFIX  43
H67   2    0.155314    0.188835    0.422151    11.00000   -1.20000
AFIX   0
C68   1    0.221722    0.248592    0.415758    11.00000    0.07618    0.09132 =
         0.05675   -0.00272    0.02965    0.00300
AFIX  43
H68   2    0.193862    0.276263    0.423384    11.00000   -1.20000
AFIX   0
C69   1    0.286681    0.259988    0.403930    11.00000    0.06414    0.07283 =
         0.04105   -0.00313    0.01099   -0.00216
C70   1    0.326877    0.218464    0.393574    11.00000    0.07412    0.06384 =
         0.04528   -0.01028    0.01487    0.01932
C71   1    0.476286    0.284970    0.357812    11.00000    0.06450    0.08451 =
         0.06246    0.00162    0.02501    0.01571
C72   1    0.544953    0.277128    0.381050    11.00000    0.06616    0.33022 =
         0.12593    0.10496    0.04050    0.02384
AFIX  43
H72   2    0.554977    0.273426    0.411106    11.00000   -1.20000
AFIX   0
C73   1    0.601382    0.274587    0.359451    11.00000    0.07096    0.34490 =
         0.15285    0.12019    0.05500    0.05333
AFIX  43
H73   2    0.648156    0.265862    0.375450    11.00000   -1.20000
AFIX   0
C74   1    0.590997    0.284313    0.316002    11.00000    0.07594    0.08544 =
         0.15535   -0.00051    0.05554    0.01743
C75   1    0.525310    0.294269    0.294998    11.00000    0.08904    0.12541 =
         0.08561   -0.01251    0.05492   -0.00480
AFIX  43
H75   2    0.516265    0.300696    0.265269    11.00000   -1.20000
AFIX   0
C76   1    0.466082    0.295940    0.314833    11.00000    0.06553    0.13356 =
         0.05818   -0.00772    0.01958    0.01220
AFIX  43
H76   2    0.419630    0.304631    0.298337    11.00000   -1.20000
AFIX   0
C77   1    0.651018    0.279852    0.293574    11.00000    0.08751    0.19462 =
         0.17322    0.04303    0.09810    0.04270
C78   1    0.711691    0.322490    0.318849    11.00000    0.13869    0.21258 =
         0.24273    0.07939    0.07870    0.07076
AFIX 137
H78   2    0.721288    0.316181    0.349570    11.00000   -1.50000
H78A  2    0.693773    0.358610    0.312547    11.00000   -1.50000
H78B  2    0.755971    0.317950    0.309411    11.00000   -1.50000
AFIX   0
C79   1    0.684179    0.229017    0.300702    11.00000    0.19844    0.11318 =
         0.54219   -0.03702    0.27181    0.02309
AFIX 137
H79   2    0.696047    0.221066    0.331226    11.00000   -1.50000
H79A  2    0.728021    0.229019    0.290416    11.00000   -1.50000
H79B  2    0.651214    0.202098    0.285353    11.00000   -1.50000
AFIX   0
C80   1    0.632849    0.304524    0.251699    11.00000    0.18982    0.22342 =
         0.34724   -0.03988    0.23562   -0.04027
AFIX 137
H80   2    0.676360    0.309077    0.241456    11.00000   -1.50000
H80A  2    0.610939    0.339138    0.253619    11.00000   -1.50000
H80B  2    0.599021    0.281959    0.231843    11.00000   -1.50000
AFIX   0
C81   1    0.260294    0.355466    0.408512    11.00000    0.07385    0.05948 =
         0.07586   -0.00086    0.02821    0.00274
C82   1    0.258492    0.376271    0.448222    11.00000    0.06348    0.04819 =
         0.08922   -0.01525    0.03257   -0.00835
C83   1    0.198699    0.410943    0.451677    11.00000    0.05920    0.05891 =
         0.12141   -0.01914    0.05283   -0.00371
C84   1    0.154543    0.425131    0.417139    11.00000    0.05817    0.10190 =
         0.13987    0.01851    0.02883    0.02952
AFIX  43
H84   2    0.120946    0.451808    0.419442    11.00000   -1.20000
AFIX   0
C85   1    0.097870    0.420484    0.338612    11.00000    0.12167    0.12128 =
         0.13810    0.05625    0.02077    0.06234
AFIX  43
H85   2    0.063021    0.446143    0.341004    11.00000   -1.20000
AFIX   0
C86   1    0.097596    0.397496    0.298331    11.00000    0.09488    0.21771 =
         0.10779    0.05831    0.04235    0.05560
AFIX  43
H86   2    0.061364    0.405956    0.273622    11.00000   -1.20000
AFIX   0
C87   1    0.151395    0.362815    0.296550    11.00000    0.08887    0.12264 =
         0.09301    0.00944    0.01502    0.01325
AFIX  43
H87   2    0.151122    0.347507    0.269722    11.00000   -1.20000
AFIX   0
C88   1    0.204732    0.348775    0.330044    11.00000    0.05843    0.08747 =
         0.08314    0.01610    0.01087    0.00774
AFIX  43
H88   2    0.240679    0.324828    0.326232    11.00000   -1.20000
AFIX   0
C89   1    0.207116    0.369667    0.370739    11.00000    0.06934    0.06372 =
         0.10058    0.01418    0.03742    0.00405
C90   1    0.150818    0.404539    0.375012    11.00000    0.05900    0.09890 =
         0.12480    0.01233    0.03713    0.01341
C91   1    0.185886    0.430003    0.492469    11.00000    0.07276    0.07926 =
         0.13998   -0.02794    0.06367   -0.01019
C92   1    0.141723    0.403427    0.510247    11.00000    0.32066    0.10222 =
         0.26086   -0.10447    0.23992   -0.09713
AFIX  43
H92   2    0.125825    0.369573    0.499124    11.00000   -1.20000
AFIX   0
C93   1    0.116444    0.423274    0.545718    11.00000    0.17610    0.13425 =
         0.20895   -0.04054    0.15265   -0.04780
AFIX  43
H93   2    0.082001    0.404389    0.556506    11.00000   -1.20000
AFIX   0
C94   1    0.144390    0.471110    0.563539    11.00000    0.11819    0.11660 =
         0.24222   -0.10855    0.11779   -0.02372
C95   1    0.190683    0.493583    0.545174    11.00000    0.14795    0.12210 =
         0.25392   -0.10617    0.12858   -0.07046
AFIX  43
H95   2    0.212030    0.525352    0.557935    11.00000   -1.20000
AFIX   0
C96   1    0.212221    0.476663    0.509478    11.00000    0.12622    0.08164 =
         0.14038   -0.04028    0.08077   -0.04646
AFIX  43
H96   2    0.244029    0.497000    0.497582    11.00000   -1.20000
AFIX   0
C97   1    0.118305    0.491876    0.600897    11.00000    0.10854    0.30676 =
         0.23909   -0.17911    0.12210   -0.08807
C98   1    0.176080    0.519733    0.632982    11.00000    0.18046    0.19620 =
         0.18286   -0.06915    0.11447   -0.01909
AFIX 137
H98   2    0.158050    0.529351    0.657788    11.00000   -1.50000
H98A  2    0.190434    0.551800    0.620201    11.00000   -1.50000
H98B  2    0.217474    0.496233    0.641902    11.00000   -1.50000
AFIX   0
C99   1    0.081362    0.458176    0.621314    11.00000    0.33149    0.22865 =
         0.25965   -0.13239    0.23273   -0.12255
AFIX 137
H99   2    0.041207    0.477158    0.628148    11.00000   -1.50000
H99A  2    0.113474    0.445237    0.647629    11.00000   -1.50000
H99B  2    0.063122    0.428157    0.602691    11.00000   -1.50000
AFIX   0
C100  1    0.049265    0.520355    0.583683    11.00000    0.30339    0.62905 =
         0.22101   -0.11641    0.06577    0.31644
AFIX 137
H100  2    0.010945    0.502965    0.593732    11.00000   -1.50000
H101  2    0.037769    0.519622    0.552509    11.00000   -1.50000
H102  2    0.053857    0.557135    0.593533    11.00000   -1.50000
AFIX   0
S4    5    0.408919    0.388520    0.385744    11.00000    0.07686    0.07571 =
         0.08800   -0.02203    0.04397   -0.01581
O12   3    0.375548    0.420755    0.409946    11.00000    0.23019    0.10257 =
         0.24029   -0.04113    0.18843   -0.04766
O13   3    0.482965    0.385666    0.406313    11.00000    0.10771    0.13771 =
         0.27282   -0.04037    0.02930   -0.04818
O14   3    0.404412    0.401198    0.344918    11.00000    0.38412    0.11476 =
         0.13742   -0.03180    0.17461   -0.10056
S5    5    0.324159    0.360210    0.494960    11.00000    0.06818    0.08686 =
         0.07002   -0.02371    0.03322   -0.00841
O15   3    0.358463    0.413068    0.506907    11.00000    0.10097    0.08852 =
         0.10431   -0.02777    0.03582    0.01359
O16   3    0.372578    0.325406    0.483498    11.00000    0.09768    0.07617 =
         0.06338   -0.00176    0.02964    0.03325
O17   3    0.286862    0.342940    0.524844    11.00000    0.10601    0.13015 =
         0.09428   -0.01666    0.04971   -0.01005
MG2   4    0.424529    0.461235    0.473636    11.00000    0.17175    0.14665 =
         0.14969   -0.02286    0.05969   -0.00268
O18   3    0.500000    0.418710    0.500000    10.50000    0.09433    0.10293 =
         0.12034    0.00000    0.07595    0.00000
O19   3    0.335271    0.504569    0.439372    11.00000    0.08944    0.06855 =
         0.07361   -0.02774    0.00491    0.00072
K3    6    0.500000    0.290093    0.500000    10.50000    0.12129    0.13323 =
         0.56808    0.00000    0.02621    0.00000
K4    6    0.403791    0.446632    0.590062    11.00000    0.13564    0.13975 =
         0.08961   -0.01299    0.06495   -0.01994
O20   3    0.287236    0.392620    0.599448    11.00000    0.36691    0.23471 =
         0.20264   -0.10779    0.18803   -0.15582
S6    5    0.423860    0.557755    0.534798    11.00000    0.47534    0.08867 =
         0.06500   -0.01666    0.08383   -0.11794
O21   3    0.380242    0.558346    0.559840    11.00000    0.15224    0.07625 =
         0.17481   -0.02879   -0.04581    0.00203
O22   3    0.462760    0.508525    0.536106    11.00000    0.65328    0.05305 =
         0.30606   -0.09425    0.38367   -0.14289
O23   3    0.392347    0.567527    0.492853    11.00000    0.78637    0.24135 =
         0.07273    0.03997   -0.04937   -0.36332
C101  1    0.514677    0.637953    0.524843    11.00000    0.32045    0.04889 =
         0.07781   -0.01271    0.08548   -0.00465
C102  1    0.484911    0.607403    0.552346    11.00000    0.34075    0.06347 =
         0.06129   -0.00678    0.06703   -0.01282
C103  1    0.519661    0.612596    0.597749    11.00000    0.25728    0.04918 =
         0.06993   -0.00247    0.07550    0.00539
C104  1    0.569562    0.650587    0.610223    11.00000    0.22042    0.08974 =
         0.07193   -0.02829    0.04614   -0.01129
AFIX  43
H104  2    0.587867    0.656602    0.639821    11.00000   -1.20000
AFIX   0
C105  1    0.651617    0.725920    0.598185    11.00000    0.20090    0.14228 =
         0.12764   -0.00099    0.08179   -0.00916
AFIX  43
H105  2    0.668688    0.732102    0.627850    11.00000   -1.20000
AFIX   0
C106  1    0.675068    0.755240    0.569138    11.00000    0.19119    0.12656 =
         0.19901   -0.03468    0.11754   -0.01844
AFIX  43
H106  2    0.709948    0.781980    0.578608    11.00000   -1.20000
AFIX   0
C107  1    0.648140    0.746493    0.524692    11.00000    0.21394    0.07890 =
         0.17196    0.01350    0.12338    0.02102
AFIX  43
H107  2    0.667015    0.767150    0.505461    11.00000   -1.20000
AFIX   0
C108  1    0.597333    0.710481    0.508500    11.00000    0.23049    0.07415 =
         0.13594   -0.01743    0.09446    0.02140
AFIX  43
H108  2    0.579092    0.707120    0.478617    11.00000   -1.20000
AFIX   0
C109  1    0.570442    0.676095    0.538482    11.00000    0.30184    0.05792 =
         0.12151   -0.02980    0.12834   -0.03685
C110  1    0.595767    0.681850    0.581037    11.00000    0.22414    0.09913 =
         0.07930    0.00129    0.05448   -0.00184
C111  1    0.495718    0.582378    0.630021    11.00000    0.16989    0.07255 =
         0.06938   -0.00400    0.05807    0.01498
C112  1    0.447726    0.602305    0.651856    11.00000    0.14177    0.09956 =
         0.08668    0.00542    0.00753    0.02883
AFIX  43
H112  2    0.426674    0.636056    0.644481    11.00000   -1.20000
AFIX   0
C113  1    0.430107    0.573438    0.684399    11.00000    0.14837    0.10613 =
         0.10916   -0.00636    0.07032    0.03033
AFIX  43
H113  2    0.399455    0.589098    0.699936    11.00000   -1.20000
AFIX   0
C114  1    0.455188    0.523299    0.694958    11.00000    0.07664    0.09135 =
         0.06166    0.01288    0.02380    0.03383
C115  1    0.504168    0.505312    0.674891    11.00000    0.12182    0.07933 =
         0.08248   -0.00430    0.04821    0.01524
AFIX  43
H115  2    0.524311    0.471351    0.682552    11.00000   -1.20000
AFIX   0
C116  1    0.526727    0.532865    0.644182    11.00000    0.20586    0.07556 =
         0.08474   -0.00063    0.07505    0.02128
AFIX  43
H116  2    0.563306    0.518705    0.632343    11.00000   -1.20000
AFIX   0
C117  1    0.429174    0.492603    0.729235    11.00000    0.08227    0.12434 =
         0.06439    0.00409    0.02861    0.02047
C118  1    0.355857    0.490592    0.721517    11.00000    0.20134    0.25572 =
         0.21914    0.10275    0.12575    0.03168
AFIX 137
H118  2    0.339146    0.455349    0.710992    11.00000   -1.50000
H119  2    0.334844    0.517193    0.700119    11.00000   -1.50000
H120  2    0.341291    0.497798    0.747937    11.00000   -1.50000
AFIX   0
C119  1    0.462332    0.435826    0.735053    11.00000    0.14638    0.22886 =
         0.15860    0.07834    0.08149    0.03961
AFIX 137
H121  2    0.440493    0.414128    0.710226    11.00000   -1.50000
H122  2    0.453227    0.419654    0.760734    11.00000   -1.50000
H123  2    0.514057    0.438114    0.737845    11.00000   -1.50000
AFIX   0
C120  1    0.456654    0.520272    0.772087    11.00000    0.35719    0.20044 =
         0.08968    0.00685    0.09661   -0.08798
AFIX 137
H124  2    0.430738    0.553602    0.772249    11.00000   -1.50000
H125  2    0.507897    0.527585    0.776497    11.00000   -1.50000
H126  2    0.448934    0.497358    0.794971    11.00000   -1.50000

AFIX   0
HKLF 4 1 1 0 0 0 1 0 0 0 1

REM
REM R1 =  0.1095 for   15869 Fo > 4sig(Fo)  and  0.1513 for all   28622 data
REM   1394 parameters refined using      1 restraints

END

WGHT      0.2000      0.0000

REM Highest difference peak  0.776,  deepest hole -0.527,  1-sigma level  0.085
Q1    1   0.0437  0.2319 -0.0206  11.00000  0.05    0.78
Q2    1   0.3897  0.5627  0.5320  11.00000  0.05    0.71
Q3    1   0.4539  0.5483  0.5318  11.00000  0.05    0.66
Q4    1   0.0084  0.2715 -0.0143  11.00000  0.05    0.63
Q5    1   0.1825  0.1387 -0.1000  11.00000  0.05    0.60
Q6    1   0.5000  0.3697  0.5000  10.50000  0.05    0.60
Q7    1  -0.0450  0.2980 -0.0978  11.00000  0.05    0.57
Q8    1   0.4354  0.2155  0.5247  11.00000  0.05    0.56
Q9    1   0.4235  0.5075  0.5234  11.00000  0.05    0.56
Q10   1   0.0017  0.0064  0.4516  11.00000  0.05    0.53
Q11   1   0.1825  0.2463  0.0861  11.00000  0.05    0.53
Q12   1   0.4345  0.4069  0.4230  11.00000  0.05    0.52
Q13   1   0.1569  0.2892  0.0941  11.00000  0.05    0.51
Q14   1   0.1217  0.2793  0.0071  11.00000  0.05    0.46
Q15   1   0.1088  0.3281  0.0057  11.00000  0.05    0.46
Q16   1   0.5000  0.1964  0.5000  10.50000  0.05    0.45
Q17   1   0.4290  0.5595  0.4936  11.00000  0.05    0.44
Q18   1   0.3433  0.4244  0.3657  11.00000  0.05    0.44
Q19   1   0.0223  0.2826 -0.0720  11.00000  0.05    0.43
Q20   1   0.1481  0.4127 -0.0060  11.00000  0.05    0.40
Q21   1   0.3491  0.5907  0.5007  11.00000  0.05    0.38
Q22   1   0.4293  0.4119  0.6073  11.00000  0.05    0.38
Q23   1   0.0855  0.1831  0.0270  11.00000  0.05    0.38
Q24   1   0.1670  0.3124  0.0344  11.00000  0.05    0.38
Q25   1  -0.0255  0.3066 -0.1334  11.00000  0.05    0.38
;
_shelx_res_checksum   62605

_shelx_hkl_file
;
   0   0  -5   21542     204                                                        7518   43.76    0.81  1.0000
   0   0  -5   21657     165                                                        7586   43.76    0.81  1.0000
   0   0  -5   21512     152                                                        7500   43.76    0.81  1.0000
   0   0  -6   12736     124                                                         273   70.60    3.65  1.0000
   0   0  -6   11088     100                                                          75   70.60    3.65  1.0000
   0   0  -7   10326     174                                                        7520  -11.17    4.24  1.0000
   0   0  -7   10450     522                                                        7626  -11.17    4.24  1.0000
   0   0  -8  200589    1795                                                      229685   22.86   -2.20  1.0000
   0   0  -9   17909     417                                                        3252   55.95    0.52  1.0000
   0   0 -10  422691    2835                                                      366856  -32.39    0.13  1.0000
   0   0  13     485      93                                                         317   28.92   -2.11  1.0000
   0   0 -13     406     108                                                         388   28.92    2.11  1.0000
   0   0  14   16079     453                                                       19646   -9.74    0.89  1.0000
   0   0 -14   18473     489                                                       22288   -9.74   -0.89  1.0000
   0   0 -14   16728     465                                                       20367   -9.74   -0.89  1.0000
   0   0 -14   16477     486                                                       20090   -9.74   -0.89  1.0000
   0   0  15     150     112                                                         759   11.15    0.73  1.0000
   0   0 -15     215     182                                                         898   11.15   -0.73  1.0000
   0   0 -15     131     108                                                         716   11.15   -0.73  1.0000
   0   0 -15     296     154                                                        1058   11.15   -0.73  1.0000
   0   0  16     432     109                                                         506   -1.23   -0.27  1.0000
   0   0 -16     319     103                                                         382   -1.23    0.27  1.0000
   0   0 -16     430     107                                                         502   -1.23    0.27  1.0000
   0   0 -16     575     162                                                         658   -1.23    0.27  1.0000
   0   0  17    2142     165                                                        3425    8.92    0.05  1.0000
   0   0 -17    1878     149                                                        3088    8.92   -0.05  1.0000
   0   0 -17    1759     145                                                        2935    8.92   -0.05  1.0000
   0   0 -17    1572     130                                                        2692    8.92   -0.05  1.0000
   0   0  18    1508     118                                                         297  -15.92   -1.30  1.0000
   0   0 -18    1181     101                                                         169  -15.92    1.30  1.0000
   0   0 -18    1366     104                                                         245  -15.92    1.30  1.0000
   0   0  19    1902     149                                                        3289   10.00    0.37  1.0000
   0   0 -19    2100     139                                                        3546   10.00   -0.37  1.0000
   0   0 -19    2197     222                                                        3672   10.00   -0.37  1.0000
   0   0  20   23642     538                                                       22327   -3.15   -0.78  1.0000
   0   0 -20   24301     541                                                       22975   -3.15    0.78  1.0000
   0   0 -20   21862     514                                                       20605   -3.15    0.78  1.0000
   0   0 -20   22483     535                                                       21208   -3.15    0.78  1.0000
   0   0  21    3910     241                                                        3517   -2.35   -0.03  1.0000
   0   0 -21    3879     242                                                        3488   -2.35    0.03  1.0000
   0   0 -21    3983     171                                                        3587   -2.35    0.03  1.0000
   0   0  22   19129     304                                                       23093    9.95   -0.31  1.0000
   0   0 -22   18622     298                                                       22539    9.95    0.31  1.0000
   0   0  23      41     173                                                         146    4.15   -0.07  1.0000
   0   0 -23      70     136                                                         197    4.15    0.07  1.0000
   0   0  24     617     153                                                         403   -3.48    0.40  1.0000
   0   0 -24     615     127                                                         400   -3.48   -0.40  1.0000
   0   0 -24     495     140                                                         305   -3.48   -0.40  1.0000
   0   0  25     460     194                                                         279    3.54   -0.33  1.0000
   0   0 -25     365     140                                                         203    3.54    0.33  1.0000
   0   0 -25     167     160                                                          65    3.54    0.33  1.0000
   0   0  26     260     163                                                          89   -4.88    0.26  1.0000
   0   0 -26     286     133                                                         104   -4.88   -0.26  1.0000
   0   0 -26     507     148                                                         250   -4.88   -0.26  1.0000
   0   0  27      14     165                                                          15    5.57   -0.36  1.0000
   0   0 -27      14     131                                                         130    5.57    0.36  1.0000
   0   0 -27      73     155                                                         262    5.57    0.36  1.0000
   0   0  28     241     213                                                         237   -0.10    0.12  1.0000
   0   0 -28      51     156                                                          49   -0.10   -0.12  1.0000
   0   0  29    1148     185                                                         954   -2.22    0.85  1.0000
   0   0 -29    1127     165                                                         933   -2.22   -0.85  1.0000
   0   0  30    1252     218                                                        1289    0.38   -0.20  1.0000
   0   0 -30    1052     153                                                        1087    0.38    0.20  1.0000
   0   0  31       1     189                                                         -14   -0.72   -0.06  1.0000
   0   0 -31       1     161                                                         -23   -0.72    0.06  1.0000
   0   0  32    1204     227                                                        1517    3.10   -0.14  1.0000
   0   0  33     414     218                                                         332    1.54    0.38  1.0000
   0   0  34     660     202                                                         617   -0.64   -0.60  1.0000
   0   0  35     722     235                                                         668    0.75    0.66  1.0000
   0   0  36      27     208                                                        -182    3.76    0.39  1.0000
   0   0  37       1     234                                                        -124   -0.51   -0.40  1.0000
   0   0  38       1     210                                                         -23   -0.87    0.05  1.0000
   0   0  39      74     250                                                         136   -3.48   -2.06  1.0000
   0   0  40       0     228                                                        -198    0.01    0.10  1.0000
   0   2  -4   49768    1168                                                      135684   40.47  120.93  1.0000
   0   2   4   49928    1127                                                      135091   38.69  121.13  1.0000
   0  -2  -4   53632    1222                                                      141131   38.69 -121.13  1.0000
   0  -2   4   54340    1184                                                      143236   40.47 -120.93  1.0000
   0  -2   5    5157     281                                                        9646    5.99  -20.84  1.0000
   0   2  -5    6516     306                                                       11527    5.99   20.84  1.0000
   0   2   5    6291     266                                                       10215   13.90   17.78  1.0000
   0   2   5    7044     288                                                       11198   13.90   17.78  1.0000
   0  -2  -5    6374     279                                                       10320   13.90  -17.78  1.0000
   0   2  -5    6550     298                                                       11572    5.99   20.84  1.0000
   0  -2   5    5934     274                                                       10712    5.99  -20.84  1.0000
   0  -2   6   21257     171                                                        2511    6.49  -74.30  1.0000
   0   2  -6   20221     151                                                        2150    6.49   74.30  1.0000
   0   2   6   18424     132                                                        2319   13.44   69.67  1.0000
   0  -2  -6   18145     136                                                        2179   13.44  -69.67  1.0000
   0   2  -6   20135     121                                                        2119    6.49   74.30  1.0000
   0  -2   6   20538     135                                                        2244    6.49  -74.30  1.0000
   0  -2   7    1563     239                                                        4437   15.84   12.13  1.0000
   0   2  -7    1562     176                                                        4381   15.84  -12.13  1.0000
   0   2   7    2201     156                                                        5128   16.06   -8.24  1.0000
   0  -2  -7    1949     177                                                        4750   16.06    8.24  1.0000
   0  -2   7    1432     152                                                        4215   15.84   12.13  1.0000
   0  -2   8  141722    1539                                                      187584   36.58   42.91  1.0000
   0   2  -8  150207    1604                                                      197421   36.58  -42.91  1.0000
   0   2   8  154176    1595                                                      199748   31.51  -41.16  1.0000
   0  -2  -8  148819    1601                                                      193605   31.51   41.16  1.0000
   0  -2   8  147784    1519                                                      194608   36.58   42.91  1.0000
   0   2  -9  114019    1090                                                      128584   18.66   13.85  1.0000
   0   2   9  115959    1094                                                      130750   18.16   10.56  1.0000
   0  -2  -9  112638    1228                                                      127293   18.16  -10.56  1.0000
   0   2  -9  109552    1702                                                      123826   18.66   13.85  1.0000
   0  -2   9  108434    1073                                                      122727   18.66  -13.85  1.0000
   0   2 -10  258920    2077                                                      258680   -6.22    1.89  1.0000
   0   2  10  251461    1904                                                      246577   -4.05    4.81  1.0000
   0   2 -10  257959    2011                                                      257719   -6.22    1.89  1.0000
   0  -2  10  251833    1992                                                      251644   -6.22   -1.89  1.0000
   0  -2  11    6548     202                                                        6494    5.55  -42.30  1.0000
   0   2 -11    6623     439                                                        6186    5.55   42.30  1.0000
   0   2  11    5832     161                                                        6234   10.22   45.00  1.0000
   0  -2 -11    5370     416                                                        5936   10.22  -45.00  1.0000
   0   2 -11    6509     217                                                        6036    5.55   42.30  1.0000
   0  -2  11    6180     159                                                        5993    5.55  -42.30  1.0000
   0  -2  12   66200    1239                                                       75413   13.18   16.88  1.0000
   0   2 -12   68140    1265                                                       77451   13.18  -16.88  1.0000
   0   2  12   63049    1210                                                       73080   12.35  -18.19  1.0000
   0  -2 -12   65377    1251                                                       75633   12.35   18.19  1.0000
   0   2 -12   67353    1251                                                       76608   13.18  -16.88  1.0000
   0  -2  12   65326    1211                                                       74476   13.18   16.88  1.0000
   0  -2  13    3551     156                                                        2378   11.31   -6.00  1.0000
   0  -2 -13    3006     141                                                        1932   10.40   -4.62  1.0000
   0   2  13    3211     126                                                        2116   10.40    4.62  1.0000
   0  -2 -13    3279     144                                                        2158   10.40   -4.62  1.0000
   0   2 -13    2978     261                                                        1914   11.31    6.00  1.0000
   0  -2  14    6408     258                                                       10975   14.81   17.60  1.0000
   0   2 -14    6567     248                                                       11122   14.81  -17.60  1.0000
   0  -2 -14    6705     253                                                       11289   14.54   17.51  1.0000
   0   2 -14    7524     269                                                       12385   14.81  -17.60  1.0000
   0   2  14    7758     268                                                       12604   14.54  -17.51  1.0000
   0  -2 -14    6655     258                                                       11223   14.54   17.51  1.0000
   0   2 -14    7091     507                                                       11817   14.81  -17.60  1.0000
   0  -2  15    8907     218                                                        8705   -5.40   -5.44  1.0000
   0   2 -15    9476     278                                                        9326   -5.40    5.44  1.0000
   0  -2 -15    8924     204                                                        8935   -4.30   -5.45  1.0000
   0   2  15    8717     200                                                        8776   -4.30    5.45  1.0000
   0   2 -15    9489     197                                                        9339   -5.40    5.44  1.0000
   0  -2 -15    8562     344                                                        8571   -4.30   -5.45  1.0000
   0   2 -15    9108     260                                                        8959   -5.40    5.44  1.0000
   0  -2  16   10694     291                                                       13766   17.94    4.41  1.0000
   0   2 -16   11169     288                                                       14331   17.94   -4.41  1.0000
   0  -2 -16   10209     273                                                       12925   18.05    3.37  1.0000
   0   2  16   11568     270                                                       14497   18.05   -3.37  1.0000
   0   2 -16   10453     270                                                       13503   17.94   -4.41  1.0000
   0  -2 -16   10470     271                                                       13225   18.05    3.37  1.0000
   0   2 -16   10487     270                                                       13542   17.94   -4.41  1.0000
   0  -2  17     123     149                                                         -32    1.25   -7.99  1.0000
   0  -2 -17      77     114                                                          41    0.87   -7.66  1.0000
   0  -2  18    5225     175                                                        5462   -1.08    0.90  1.0000
   0  -2 -18    6006     170                                                        6123   -0.16    0.52  1.0000
   0   2 -18    5486     155                                                        5729   -1.08   -0.90  1.0000
   0  -2 -18    5595     178                                                        5708   -0.16    0.52  1.0000
   0   2 -18    5280     315                                                        5518   -1.08   -0.90  1.0000
   0  -2 -18    5321     241                                                        5431   -0.16    0.52  1.0000
   0  -2  19    4602     188                                                        6685    3.59  -15.92  1.0000
   0   2 -19    5375     204                                                        7615    3.59   15.92  1.0000
   0  -2 -19    5310     183                                                        7480    2.47  -14.86  1.0000
   0   2 -19    4780     168                                                        6886    3.59   15.92  1.0000
   0  -2 -19    5091     195                                                        7214    2.47  -14.86  1.0000
   0   2 -19    4547     240                                                        6598    3.59   15.92  1.0000
   0  -2 -19    4673     227                                                        6704    2.47  -14.86  1.0000
   0  -2  20    3703     180                                                        2781    5.23   -3.45  1.0000
   0   2 -20    3938     156                                                        2983    5.23    3.45  1.0000
   0  -2 -20    3628     134                                                        2632    5.68   -4.12  1.0000
   0   2 -20    3522     145                                                        2622    5.23    3.45  1.0000
   0  -2 -20    3766     190                                                        2750    5.68   -4.12  1.0000
   0   2 -20    3228     363                                                        2369    5.23    3.45  1.0000
   0  -2 -20    3641     274                                                        2643    5.68   -4.12  1.0000
   0  -2  21    7035     237                                                        7808   -3.22    0.68  1.0000
   0   2 -21    6989     209                                                        7761   -3.22   -0.68  1.0000
   0   2 -21    6398     195                                                        7138   -3.22   -0.68  1.0000
   0  -2 -21    6571     210                                                        7337   -3.38   -0.26  1.0000
   0   2 -21    7139     262                                                        7919   -3.22   -0.68  1.0000
   0  -2 -21    7247     217                                                        8050   -3.38   -0.26  1.0000
   0  -2  22     144     172                                                         317    8.44    1.75  1.0000
   0   2  22     240     130                                                         460    7.93   -1.83  1.0000
   0   2 -22     165     115                                                         357    8.44   -1.75  1.0000
   0  -2 -22     112     141                                                         233    7.93    1.83  1.0000
   0  -2  23     408     182                                                         606    0.07   -3.74  1.0000
   0   2  23     459     166                                                         662   -0.13    3.60  1.0000
   0   2 -23     430     133                                                         628    0.07    3.74  1.0000
   0  -2 -23     476     140                                                         686   -0.13   -3.60  1.0000
   0   2 -23     297     138                                                         464    0.07    3.74  1.0000
   0  -2 -23     389     145                                                         580   -0.13   -3.60  1.0000
   0  -2  24     535     190                                                         811    2.90    2.75  1.0000
   0   2  24     422     176                                                         665    2.42   -3.43  1.0000
   0   2 -24     427     131                                                         675    2.90   -2.75  1.0000
   0  -2 -24     527     139                                                         801    2.42    3.43  1.0000
   0   2 -24     501     161                                                         767    2.90   -2.75  1.0000
   0  -2 -24     409     141                                                         653    2.42    3.43  1.0000
   0  -2  25    1667     210                                                        1581    1.86    1.20  1.0000
   0   2  25    1701     171                                                        1664    1.70   -0.69  1.0000
   0   2 -25    1487     138                                                        1406    1.86   -1.20  1.0000
   0  -2 -25    1471     157                                                        1436    1.70    0.69  1.0000
   0   2 -25    1665     157                                                        1580    1.86   -1.20  1.0000
   0  -2 -25    1849     170                                                        1810    1.70    0.69  1.0000
   0  -2  26     614     206                                                         579   -1.13   -1.49  1.0000
   0   2  26     868     189                                                         814   -1.48    1.66  1.0000
   0   2 -26     570     135                                                         539   -1.13    1.49  1.0000
   0  -2 -26     605     152                                                         554   -1.48   -1.66  1.0000
   0   2 -26     469     149                                                         441   -1.13    1.49  1.0000
   0  -2 -26     692     159                                                         638   -1.48   -1.66  1.0000
   0  -2  27     427     174                                                         204    0.17   -4.76  1.0000
   0   2  27      41     192                                                         -10   -0.19    4.64  1.0000
   0   2 -27     362     136                                                         160    0.17    4.76  1.0000
   0  -2 -27     309     149                                                         132   -0.19   -4.64  1.0000
   0   2 -27     196     162                                                          58    0.17    4.76  1.0000
   0  -2 -27     125     155                                                          25   -0.19   -4.64  1.0000
   0  -2  28    1008     185                                                         879    4.23   -1.70  1.0000
   0   2  28    1048     177                                                         853    4.42    0.92  1.0000
   0   2 -28     744     162                                                         626    4.23    1.70  1.0000
   0  -2 -28     891     158                                                         712    4.42   -0.92  1.0000
   0  -2  29     345     216                                                         512   -2.62    1.34  1.0000
   0   2  29     394     210                                                         612   -3.24   -1.49  1.0000
   0   2 -29     373     162                                                         546   -2.62   -1.34  1.0000
   0  -2 -29     462     160                                                         697   -3.24    1.49  1.0000
   0  -2  30     341     220                                                         435    1.34   -1.22  1.0000
   0   2  30     379     178                                                         461    0.95    1.37  1.0000
   0   2 -30     223     162                                                         299    1.34    1.22  1.0000
   0  -2 -30     311     155                                                         386    0.95   -1.37  1.0000
   0  -2  31     473     219                                                         391    0.02   -2.82  1.0000
   0   2  31     629     216                                                         581   -0.06    1.42  1.0000
   0   2 -31     530     163                                                         442    0.02    2.82  1.0000
   0  -2 -31     466     163                                                         425   -0.06   -1.42  1.0000
   0  -2  32     214     188                                                         223   -0.73   -0.61  1.0000
   0   2  32       0     217                                                        -194   -0.08    0.00  1.0000
   0  -2  33     265     187                                                         177    4.26    0.59  1.0000
   0   2  33     385     181                                                         330    3.51   -1.28  1.0000
   0  -2  34    1300     236                                                        1329   -0.90    0.58  1.0000
   0   2  34    1157     223                                                        1207   -0.92   -0.85  1.0000
   0  -2  35      54     234                                                         163   -4.27    1.63  1.0000
   0   2  35      48     200                                                           0   -4.90   -1.23  1.0000
   0  -2  36     286     208                                                         510    1.99   -6.81  1.0000
   0   2  36      48     230                                                          98    1.82    5.79  1.0000
   0  -2  37       2     241                                                        -178   -0.41    1.06  1.0000
   0   2  37      78     236                                                          93    0.26   -1.17  1.0000
   0  -2  38      41     236                                                          34    0.49    0.13  1.0000
   0   2  38       0     238                                                        -287   -0.33   -0.29  1.0000
   0  -2  39      19     220                                                        -130   -1.58   -2.71  1.0000
   0   2  39      16     246                                                        -119   -1.49    2.47  1.0000
   0  -2  40     179     248                                                         279   -1.79   -2.77  1.0000
   0   2  40      78     219                                                         164   -2.70    1.94  1.0000
   0   4   0   83429     963                                                       45257  -82.98   52.54  1.0000
   0   4   0   82403     939                                                       44418  -82.98   52.54  1.0000
   0  -4   1   48424     775                                                       38915  -14.34   14.57  1.0000
   0   4  -1   48868     781                                                       39313  -14.34  -14.57  1.0000
   0   4   1   48018     768                                                       40320   -7.90  -12.15  1.0000
   0  -4  -1   46047     743                                                       38515   -7.90   12.15  1.0000
   0  -4  -1   45268     715                                                       37802   -7.90   12.15  1.0000
   0  -4   2   41792    1095                                                       52763  -14.80  -10.99  1.0000
   0   4  -2   44228    1155                                                       55503  -14.80   10.99  1.0000
   0   4   2   46017    1136                                                       56157  -16.32    5.64  1.0000
   0  -4  -2   45563    1127                                                       55611  -16.32   -5.64  1.0000
   0  -4  -2   47160     461                                                       57375  -16.32   -5.64  1.0000
   0   4  -2   44538    1119                                                       55850  -14.80   10.99  1.0000
   0  -4   3  158147    2435                                                      303129   80.46 -103.74  1.0000
   0   4  -3  162633    2474                                                      309451   80.46  103.74  1.0000
   0   4   3  167276    2390                                                      308855   79.62   99.18  1.0000
   0  -4   4   19658     339                                                       11452    3.17   44.34  1.0000
   0   4  -4   19845     348                                                       12056    3.17  -44.34  1.0000
   0   4   4   18520     297                                                       11425    0.40  -47.83  1.0000
   0  -4  -4   17696     279                                                       10214    0.40   47.83  1.0000
   0   4   4   18026     306                                                       10985    0.40  -47.83  1.0000
   0  -4  -4   18587     305                                                       10987    0.40   47.83  1.0000
   0   4  -4   19469     310                                                       11734    3.17  -44.34  1.0000
   0  -4   4   18762     288                                                       10705    3.17   44.34  1.0000
   0  -4   5  177300    1373                                                      157316   14.26  -11.70  1.0000
   0   4   5  180040    1288                                                      155336   13.29   17.53  1.0000
   0  -4  -5  182682    1335                                                      157792   13.29  -17.53  1.0000
   0   4   5  191031    1417                                                      165557   13.29   17.53  1.0000
   0  -4  -5  191961    1416                                                      166424   13.29  -17.53  1.0000
   0   4  -5  186753    1496                                                      166220   14.26   11.70  1.0000
   0  -4   5  185224    1357                                                      164786   14.26  -11.70  1.0000
   0  -4   6  178968    1882                                                      226233  -20.64  -35.50  1.0000
   0   4  -6  180269    1845                                                      227452  -20.64   35.50  1.0000
   0   4   6  187778    1878                                                      231300  -18.06   33.20  1.0000
   0  -4   6  186144    1844                                                      234301  -20.64  -35.50  1.0000
   0  -4   7    7570     152                                                        1910  -13.35  -29.12  1.0000
   0   4  -7    7567     155                                                        1908  -13.35   29.12  1.0000
   0   4   7    8239     132                                                        2620  -12.61   26.53  1.0000
   0  -4  -7    7305     153                                                        2103  -12.61  -26.53  1.0000
   0   4   7    8264     148                                                        2634  -12.61   26.53  1.0000
   0  -4  -7    8266     170                                                        2636  -12.61  -26.53  1.0000
   0   4  -7    7565     119                                                        1907  -13.35   29.12  1.0000
   0  -4   7    8676     140                                                        2489  -13.35  -29.12  1.0000
   0  -4   8   13491     179                                                        4915   51.23   -1.52  1.0000
   0   4  -8   14194     180                                                        5254   51.23    1.52  1.0000
   0   4   8   14168     138                                                        5251   45.71   -1.82  1.0000
   0   4   8   13380     163                                                        4721   45.71   -1.82  1.0000
   0  -4  -8   13329     176                                                        4843   45.71    1.82  1.0000
   0   4  -8   13890     174                                                        5034   51.23    1.52  1.0000
   0  -4   8   13222     149                                                        4719   51.23   -1.52  1.0000
   0  -4   9  127497    1785                                                      114956    1.94   17.37  1.0000
   0   4  -9  131352    1848                                                      118647    1.94  -17.37  1.0000
   0   4   9  129395    1834                                                      119391    4.12  -15.54  1.0000
   0  -4  -9  133477    1120                                                      123290    4.12   15.54  1.0000
   0   4  -9  137672    1137                                                      124664    1.94  -17.37  1.0000
   0  -4   9  135298    1031                                                      122376    1.94   17.37  1.0000
   0   4 -10      83      97                                                         102  -12.51    3.06  1.0000
   0   4  10      36      87                                                         156  -10.56    5.58  1.0000
   0  -4  10      52      94                                                         144  -12.51   -3.06  1.0000
   0  -4  11   41961    1076                                                       53770   -8.16  -32.71  1.0000
   0   4 -11   42779    1096                                                       54605   -8.16   32.71  1.0000
   0   4  11   41456    1026                                                       52083  -10.04   32.08  1.0000
   0   4  11   42319    1067                                                       53066  -10.04   32.08  1.0000
   0  -4 -11   43904    1112                                                       54976  -10.04  -32.08  1.0000
   0   4 -11   46025    1045                                                       58318   -8.16   32.71  1.0000
   0  -4  11   44334    1098                                                       56492   -8.16  -32.71  1.0000
   0  -4  12    8344     190                                                        6758   26.00  -13.32  1.0000
   0   4 -12    8344     176                                                        6804   26.00   13.32  1.0000
   0   4  12    7958     152                                                        6493   23.84   11.78  1.0000
   0   4  12    8663     169                                                        7191   23.84   11.78  1.0000
   0  -4 -12    8657     199                                                        7146   23.84  -11.78  1.0000
   0   4 -12    8243     454                                                        6703   26.00   13.32  1.0000
   0  -4  12    8688     160                                                        7103   26.00  -13.32  1.0000
   0  -4  13   20805     407                                                       16328  -10.22   16.42  1.0000
   0   4 -13   21018     395                                                       16545  -10.22  -16.42  1.0000
   0   4  13   20278     376                                                       15830   -7.31  -15.30  1.0000
   0   4  13   20433     384                                                       15968   -7.31  -15.30  1.0000
   0  -4 -13   20362     419                                                       15887   -7.31   15.30  1.0000
   0   4 -13   19680     556                                                       15346  -10.22  -16.42  1.0000
   0  -4  13   20358     367                                                       15928  -10.22   16.42  1.0000
   0  -4  14   12883     287                                                        9351    3.31  -15.40  1.0000
   0   4 -14   13300     212                                                        9698    3.31   15.40  1.0000
   0   4  14   13057     186                                                        9204    4.18   16.02  1.0000
   0  -4 -14   13287     388                                                        9410    4.18  -16.02  1.0000
   0  -4  14   12944     179                                                        9403    3.31  -15.40  1.0000
   0  -4  15   69094    1479                                                       80770  -26.69    0.01  1.0000
   0   4 -15   74441     558                                                       86608  -26.69   -0.01  1.0000
   0   4  15   70986    1472                                                       83018  -27.04    0.02  1.0000
   0  -4 -15   70546    1505                                                       82507  -27.04   -0.02  1.0000
   0   4 -15   75785     644                                                       88065  -26.69   -0.01  1.0000
   0  -4  15   71125    1470                                                       82977  -26.69    0.01  1.0000
   0  -4  16   10619     261                                                        9736    3.90   -8.99  1.0000
   0   4 -16   10398     466                                                        9427    3.90    8.99  1.0000
   0   4  16   10099     222                                                        9349    3.09    8.85  1.0000
   0  -4 -16   10075     308                                                        9419    3.09   -8.85  1.0000
   0  -4  16    9296     198                                                        8461    3.90   -8.99  1.0000
   0  -4  17     471     163                                                         265    1.91   -3.58  1.0000
   0   4 -17     844     111                                                         562    1.91    3.58  1.0000
   0   4  17     682     109                                                         429    2.35    3.17  1.0000
   0  -4  17     849     108                                                         563    1.91   -3.58  1.0000
   0  -4  18   17281     352                                                       17376    1.32   -4.61  1.0000
   0   4 -18   17386     333                                                       17433    1.32    4.61  1.0000
   0   4  18   15682     293                                                       15842    1.32    5.62  1.0000
   0   4 -18   16425     547                                                       16470    1.32    4.61  1.0000
   0  -4  18   16218     287                                                       16309    1.32   -4.61  1.0000
   0  -4  19    9670     344                                                       11818    4.01   -6.52  1.0000
   0   4 -19    8638     314                                                       10674    4.01    6.52  1.0000
   0   4 -19    9700     318                                                       11851    4.01    6.52  1.0000
   0   4  19    8885     334                                                       10894    4.55    6.08  1.0000
   0  -4  20   10443     350                                                       12618   -1.64  -16.40  1.0000
   0   4 -20   11779     381                                                       14051   -1.64   16.40  1.0000
   0   4 -20   10469     344                                                       12592   -1.64   16.40  1.0000
   0   4  20   11718     357                                                       13926   -1.26   16.76  1.0000
   0  -4 -20   10695     354                                                       12846   -1.26  -16.76  1.0000
   0  -4  21     350     163                                                         311    0.30    4.32  1.0000
   0   4  21     590     122                                                         614   -0.31   -5.30  1.0000
   0   4 -21     458     125                                                         432    0.30   -4.32  1.0000
   0  -4 -21     439     146                                                         435   -0.31    5.30  1.0000
   0   4 -21     578     129                                                         553    0.30   -4.32  1.0000
   0  -4  22     132     157                                                         -76    0.96   -8.32  1.0000
   0   4 -22     591     116                                                         165    0.96    8.32  1.0000
   0   4 -22     132     147                                                         -64    0.96    8.32  1.0000
   0  -4  23     631     205                                                         909   -2.71    2.88  1.0000
   0   4 -23     603     125                                                         879   -2.71   -2.88  1.0000
   0  -4 -23     678     149                                                        1027   -3.09    3.72  1.0000
   0  -4 -23     577     181                                                         901   -3.09    3.72  1.0000
   0  -4  24    5926     212                                                        5832    0.02   -0.75  1.0000
   0   4 -24    6039     178                                                        5942    0.02    0.75  1.0000
   0  -4 -24    5718     196                                                        5644    0.57    0.18  1.0000
   0   4 -24    5745     207                                                        5651    0.02    0.75  1.0000
   0  -4 -24    5221     163                                                        5150    0.57    0.18  1.0000
   0  -4  25     946     217                                                         601    4.77   -0.09  1.0000
   0   4 -25     320     139                                                         133    4.77    0.09  1.0000
   0  -4 -25     474     148                                                         225    5.31   -0.60  1.0000
   0  -4  26    2579     246                                                        3480   -4.53   -5.00  1.0000
   0   4 -26    2560     163                                                        3429   -4.53    5.00  1.0000
   0  -4 -26    2673     186                                                        3535   -4.23   -4.86  1.0000
   0   4 -26    2732     186                                                        3629   -4.53    5.00  1.0000
   0  -4 -26    2359     160                                                        3172   -4.23   -4.86  1.0000
   0  -4  27    1020     224                                                        1093   -0.31   -3.62  1.0000
   0   4 -27     669     141                                                         726   -0.31    3.62  1.0000
   0  -4 -27     825     162                                                         941   -0.85   -4.08  1.0000
   0   4 -27     527     214                                                         575   -0.31    3.62  1.0000
   0  -4 -27     687     139                                                         791   -0.85   -4.08  1.0000
   0  -4  28    3062     241                                                        3208   -0.91   -0.41  1.0000
   0   4 -28    2574     185                                                        2710   -0.91    0.41  1.0000
   0  -4 -28    2729     153                                                        2873   -0.63   -0.78  1.0000
   0  -4  29     773     190                                                         788   -0.38   -0.18  1.0000
   0   4 -29     461     193                                                         473   -0.38    0.18  1.0000
   0  -4 -29     537     138                                                         535    0.69    0.81  1.0000
   0  -4  30    1921     210                                                        2206    2.48   -3.13  1.0000
   0   4  30    2115     219                                                        2398    2.43    3.01  1.0000
   0   4 -30    1838     185                                                        2114    2.48    3.13  1.0000
   0  -4 -30    1946     154                                                        2219    2.43   -3.01  1.0000
   0  -4  31     309     193                                                         357   -0.43   -1.10  1.0000
   0   4  31     199     174                                                         218    0.23    1.13  1.0000
   0   4 -31     148     185                                                         182   -0.43    1.10  1.0000
   0  -4 -31      34     156                                                          40    0.23   -1.13  1.0000
   0  -4  32     314     189                                                         166   -4.04    0.95  1.0000
   0   4  32     517     185                                                         329   -4.13   -0.76  1.0000
   0  -4  33     210     197                                                         288    2.47   -1.21  1.0000
   0   4  33     490     222                                                         638    2.40   -0.25  1.0000
   0  -4  34       8     228                                                        -396   -2.06    0.02  1.0000
   0   4  34      59     218                                                          45   -0.91    0.32  1.0000
   0  -4  35     428     229                                                         525   -1.83   -1.69  1.0000
   0   4  35     131     196                                                         201   -2.41    2.09  1.0000
   0  -4  36      16     237                                                         -61   -2.82    0.89  1.0000
   0   4  36     218     227                                                         306   -2.02   -1.29  1.0000
   0  -4  37     210     236                                                         189   -0.94    0.35  1.0000
   0   4  37     193     233                                                         171   -0.08   -0.58  1.0000
   0  -4  38       4     249                                                           0    1.40    0.22  1.0000
   0   4  38     334     206                                                         292    1.94    0.34  1.0000
   0  -4  39       2     208                                                        -150    0.52    0.93  1.0000
   0   4  39       0     240                                                         -27    0.30    0.06  1.0000
   0  -4  40       2     253                                                        -302   -0.65   -0.85  1.0000
   0   4  40       4     236                                                          -5   -1.14    0.87  1.0000
   0   6   0   62702    1144                                                       64915    8.10  -16.79  1.0000
   0   6   0   60466    1081                                                       62628    8.10  -16.79  1.0000
   0  -6   1  102019    1066                                                       59397  -31.94  -45.13  1.0000
   0   6  -1  104301    1085                                                       61177  -31.94   45.13  1.0000
   0   6   1  102460    1050                                                       60560  -31.31   44.12  1.0000
   0  -6  -1  102573    1031                                                       60613  -31.31  -44.12  1.0000
   0  -6   2   21556     652                                                       27546    7.95  -39.55  1.0000
   0   6  -2   22489     690                                                       28876    7.95   39.55  1.0000
   0   6   2   21226     661                                                       28398   10.47   39.38  1.0000
   0  -6  -2   20882     637                                                       27768   10.47  -39.38  1.0000
   0  -6  -2   21826     645                                                       28917   10.47  -39.38  1.0000
   0   6  -2   22532     651                                                       28928    7.95   39.55  1.0000
   0  -6   3   34825     594                                                       24602  -20.92  -30.57  1.0000
   0   6  -3   35111     609                                                       24881  -20.92   30.57  1.0000
   0   6   3   33516     542                                                       23495  -20.63   26.73  1.0000
   0  -6  -3   32951     540                                                       22985  -20.63  -26.73  1.0000
   0   6   3   31173     513                                                       21495  -20.63   26.73  1.0000
   0  -6  -3   34511     566                                                       24321  -20.63  -26.73  1.0000
   0   6  -3   34229     562                                                       24118  -20.92   30.57  1.0000
   0  -6   4  114508    1315                                                      142717   31.58    2.53  1.0000
   0   6  -4  118681    1319                                                      147359   31.58   -2.53  1.0000
   0  -6  -4  118704    1278                                                      147121   30.64    0.61  1.0000
   0   6   4  116467    1304                                                      144613   30.64   -0.61  1.0000
   0  -6  -4  120195    1273                                                      148782   30.64    0.61  1.0000
   0  -6   4  120408    1256                                                      149303   31.58    2.53  1.0000
   0  -6   5    4738     153                                                        1911   16.97    7.75  1.0000
   0   6  -5    4881     155                                                        1993   16.97   -7.75  1.0000
   0   6   5    4829     120                                                        2560   13.67   -4.45  1.0000
   0  -6  -5    4380     138                                                        2246   13.67    4.45  1.0000
   0   6   5    4325     136                                                        2195   13.67   -4.45  1.0000
   0  -6  -5    4750     162                                                        2515   13.67    4.45  1.0000
   0   6  -5    5938     135                                                        2689   16.97   -7.75  1.0000
   0  -6   5    5063     129                                                        2120   16.97    7.75  1.0000
   0  -6   6    5968     219                                                        8146  -21.18   -7.99  1.0000
   0   6  -6    6427     218                                                        8729  -21.18    7.99  1.0000
   0   6   6    6767     252                                                        9274  -18.29    9.28  1.0000
   0  -6  -6    5636     196                                                        7875  -18.29   -9.28  1.0000
   0   6   6    6431     259                                                        8864  -18.29    9.28  1.0000
   0  -6  -6    5847     209                                                        8136  -18.29   -9.28  1.0000
   0   6  -6    6388     188                                                        8681  -21.18    7.99  1.0000
   0  -6   6    6035     189                                                        8229  -21.18   -7.99  1.0000
   0  -6   7    7652     171                                                        4045  -17.14  -13.66  1.0000
   0   6  -7    7722     172                                                        4108  -17.14   13.66  1.0000
   0   6   7    7112     145                                                        3945  -15.33   12.91  1.0000
   0  -6  -7    6766     147                                                        3672  -15.33  -12.91  1.0000
   0   6   7    6830     149                                                        3730  -15.33   12.91  1.0000
   0  -6  -7    6905     155                                                        3778  -15.33  -12.91  1.0000
   0   6  -7    7403     150                                                        3869  -17.14   13.66  1.0000
   0  -6   7    7128     127                                                        3655  -17.14  -13.66  1.0000
   0  -6   8   11658     570                                                       24391   14.02  -42.90  1.0000
   0   6  -8   11502     591                                                       24124   14.02   42.90  1.0000
   0   6   8   11040     519                                                       23469   15.84   43.29  1.0000
   0  -6  -8   11707     551                                                       24519   15.84  -43.29  1.0000
   0   6   8   11587     561                                                       24307   15.84   43.29  1.0000
   0  -6  -8   11855     573                                                       24744   15.84  -43.29  1.0000
   0   6  -8   10538     521                                                       22650   14.02   42.90  1.0000
   0  -6   8   10774     520                                                       23042   14.02  -42.90  1.0000
   0  -6   9    4131     290                                                        9724   17.95   25.16  1.0000
   0   6  -9    3847     289                                                        9271   17.95  -25.16  1.0000
   0   6   9    4044     247                                                        9275   16.68  -24.12  1.0000
   0  -6  -9    4291     266                                                        9657   16.68   24.12  1.0000
   0   6   9    4110     264                                                        9379   16.68  -24.12  1.0000
   0  -6  -9    4459     282                                                        9918   16.68   24.12  1.0000
   0   6  -9    3740     289                                                        9096   17.95  -25.16  1.0000
   0  -6   9    3813     241                                                        9207   17.95   25.16  1.0000
   0  -6  10   15579     380                                                       18650    4.54   14.89  1.0000
   0   6 -10   16330     404                                                       19468    4.54  -14.89  1.0000
   0   6  10   16525     353                                                       18825    4.75  -12.28  1.0000
   0  -6 -10   17067     374                                                       19417    4.75   12.28  1.0000
   0   6  10   17472     471                                                       19842    4.75  -12.28  1.0000
   0  -6 -10   18327     492                                                       20769    4.75   12.28  1.0000
   0   6 -10   17071     486                                                       20283    4.54  -14.89  1.0000
   0  -6  10   16560     449                                                       19732    4.54   14.89  1.0000
   0  -6  11    1138     169                                                        2393   -8.36   -9.03  1.0000
   0   6 -11    1129     152                                                        2350   -8.36    9.03  1.0000
   0   6  11    1238     137                                                        2437   -8.93    6.22  1.0000
   0   6  11    1129     137                                                        2282   -8.93    6.22  1.0000
   0  -6 -11    1098     145                                                        2256   -8.93   -6.22  1.0000
   0   6 -11    1093     184                                                        2297   -8.36    9.03  1.0000
   0  -6  11     937     130                                                        2092   -8.36   -9.03  1.0000
   0  -6  12     937     163                                                        1233    5.72   -3.83  1.0000
   0   6 -12     929     127                                                        1244    5.72    3.83  1.0000
   0   6  12    1058     122                                                        1362    4.90    2.63  1.0000
   0  -6 -12     975     118                                                        1249    4.90   -2.63  1.0000
   0   6  12    1003     131                                                        1298    4.90    2.63  1.0000
   0  -6 -12    1176     137                                                        1480    4.90   -2.63  1.0000
   0  -6  12     975     124                                                        1278    5.72   -3.83  1.0000
   0  -6  13   16200     315                                                       21938   18.27    7.97  1.0000
   0   6 -13   14906     485                                                       20540   18.27   -7.97  1.0000
   0   6  13   13848     449                                                       19722   18.85   -5.46  1.0000
   0  -6 -13   14769     475                                                       20721   18.85    5.46  1.0000
   0   6  13   14366     476                                                       20343   18.85   -5.46  1.0000
   0  -6 -13   15527     515                                                       21623   18.85    5.46  1.0000
   0   6 -13   14942     489                                                       20582   18.27   -7.97  1.0000
   0  -6  13   15775     479                                                       21439   18.27    7.97  1.0000
   0  -6  14    4545     191                                                        1850  -18.52   -6.05  1.0000
   0   6 -14    4635     159                                                        1919  -18.52    6.05  1.0000
   0   6  14    4740     133                                                        1924  -19.27    7.01  1.0000
   0   6  14    4483     130                                                        1757  -19.27    7.01  1.0000
   0  -6 -14    4491     146                                                        1751  -19.27   -7.01  1.0000
   0  -6  14    4425     123                                                        1772  -18.52   -6.05  1.0000
   0  -6  15   10949     254                                                       10120   -6.70    7.93  1.0000
   0   6 -15   11498     249                                                       10691   -6.70   -7.93  1.0000
   0   6  15   11698     239                                                       10916   -6.61   -7.99  1.0000
   0  -6 -15   12097     261                                                       11264   -6.61    7.99  1.0000
   0   6  15   11175     239                                                       10406   -6.61   -7.99  1.0000
   0  -6 -15   12057     265                                                       11225   -6.61    7.99  1.0000
   0   6 -15   10222     371                                                        9451   -6.70   -7.93  1.0000
   0  -6  15   11790     230                                                       10936   -6.70    7.93  1.0000
   0  -6  16    4076     209                                                        5505   -2.67   -7.86  1.0000
   0   6 -16    3922     156                                                        5325   -2.67    7.86  1.0000
   0   6  16    4734     168                                                        5948   -2.60    6.37  1.0000
   0  -6 -16    3780     240                                                        4870   -2.60   -6.37  1.0000
   0   6  16    4278     158                                                        5435   -2.60    6.37  1.0000
   0  -6 -16    4046     177                                                        5173   -2.60   -6.37  1.0000
   0   6 -16    4436     238                                                        5922   -2.67    7.86  1.0000
   0  -6  16    3787     145                                                        5167   -2.67   -7.86  1.0000
   0  -6  17     394     170                                                         333    5.00    0.24  1.0000
   0   6 -17     428     132                                                         364    5.00   -0.24  1.0000
   0   6  17     369     104                                                         360    4.84   -1.28  1.0000
   0  -6 -17     346     132                                                         337    4.84    1.28  1.0000
   0   6  17     394     111                                                         386    4.84   -1.28  1.0000
   0  -6 -17     445     128                                                         441    4.84    1.28  1.0000
   0  -6  17     330      96                                                         270    5.00    0.24  1.0000
   0  -6  18    6561     186                                                        4569   -5.66    7.96  1.0000
   0   6 -18    7028     172                                                        4960   -5.66   -7.96  1.0000
   0   6  18    6408     150                                                        4476   -6.94   -6.80  1.0000
   0   6  18    6426     154                                                        4491   -6.94   -6.80  1.0000
   0   6 -18    6105     169                                                        4190   -5.66   -7.96  1.0000
   0  -6  18    6353     135                                                        4396   -5.66    7.96  1.0000
   0  -6  19    5027     221                                                        4550    0.26   -3.49  1.0000
   0   6 -19    4420     146                                                        3979    0.26    3.49  1.0000
   0   6  19    5333     170                                                        4645   -0.77    4.01  1.0000
   0   6  19    5159     161                                                        4483   -0.77    4.01  1.0000
   0  -6 -19    5174     189                                                        4492   -0.77   -4.01  1.0000
   0  -6  19    4508     135                                                        4057    0.26   -3.49  1.0000
   0  -6  20     848     151                                                        1058   -7.60   -0.25  1.0000
   0   6  20     797     141                                                        1076   -8.55    0.04  1.0000
   0   6 -20     752     120                                                         960   -7.60    0.25  1.0000
   0   6  20     683     120                                                         933   -8.55    0.04  1.0000
   0   6 -20     609     242                                                         786   -7.60    0.25  1.0000
   0  -6  20     757     109                                                         950   -7.60   -0.25  1.0000
   0  -6  21    1163     158                                                        1111    0.51   -0.75  1.0000
   0   6  21    1183     123                                                        1159    3.11    1.55  1.0000
   0   6 -21    1162     141                                                        1111    0.51    0.75  1.0000
   0   6  21    1010     129                                                         986    3.11    1.55  1.0000
   0  -6  21    1061     112                                                        1012    0.51   -0.75  1.0000
   0  -6  22    1894     176                                                        2400   -4.31    3.27  1.0000
   0   6  22    1511     145                                                        2058   -3.87   -4.13  1.0000
   0   6  22    1794     143                                                        2387   -3.87   -4.13  1.0000
   0  -6 -22    1871     167                                                        2474   -3.87    4.13  1.0000
   0  -6  22    1759     122                                                        2246   -4.31    3.27  1.0000
   0  -6  23    4689     197                                                        3602   -5.21   -3.43  1.0000
   0   6  23    4555     188                                                        3413   -5.84    3.11  1.0000
   0   6  23    4509     156                                                        3373   -5.84    3.11  1.0000
   0  -6 -23    4851     194                                                        3669   -5.84   -3.11  1.0000
   0   6 -23    3995     196                                                        2999   -5.21    3.43  1.0000
   0   6 -24     608     131                                                         454   -2.40   -1.75  1.0000
   0   6  24     539     137                                                         453   -2.15   -0.74  1.0000
   0  -6  25    9148     339                                                        9395    2.37   -4.48  1.0000
   0   6  25    8979     281                                                        9420    2.78    3.51  1.0000
   0   6 -25    8039     249                                                        8294    2.37    4.48  1.0000
   0  -6 -25    8359     295                                                        8761    2.78   -3.51  1.0000
   0   6 -25    7810     353                                                        8060    2.37    4.48  1.0000
   0  -6  26    5533     224                                                        4428   -3.64    4.41  1.0000
   0   6  26    5126     196                                                        3958   -3.21   -5.65  1.0000
   0   6 -26    4935     161                                                        3895   -3.64   -4.41  1.0000
   0   6 -26    4687     332                                                        3675   -3.64   -4.41  1.0000
   0  -6  27    4793     253                                                        5161    2.26   -0.97  1.0000
   0   6 -27    4517     170                                                        4884    2.26    0.97  1.0000
   0   6 -27    4071     325                                                        4419    2.26    0.97  1.0000
   0  -6 -27    4788     187                                                        5002    1.23   -0.23  1.0000
   0  -6  28    5865     232                                                        5819    1.33    2.20  1.0000
   0   6 -28    4977     272                                                        4935    1.33   -2.20  1.0000
   0  -6 -28    5411     181                                                        5322    0.88    1.94  1.0000
   0  -6  29    1431     227                                                        1402   -1.33    0.25  1.0000
   0   6 -29     976     258                                                         950   -1.33   -0.25  1.0000
   0  -6 -29    1129     151                                                        1181   -0.97    1.01  1.0000
   0  -6  30      22     225                                                        -206    2.03   -2.73  1.0000
   0   6 -30       2     169                                                          36    2.03    2.73  1.0000
   0  -6 -30      31     126                                                          99    2.64   -1.86  1.0000
   0  -6  31     536     200                                                         618   -3.45    0.55  1.0000
   0   6 -31     454     176                                                         528   -3.45   -0.55  1.0000
   0  -6 -31     447     147                                                         492   -3.91   -0.14  1.0000
   0  -6  32     595     221                                                         741    1.43    6.24  1.0000
   0  -6  33     194     226                                                         143   -1.74    0.29  1.0000
   0  -6  34       1     228                                                        -463   -0.20   -0.49  1.0000
   0  -6  35       3     239                                                        -283   -0.84    0.90  1.0000
   0  -6  36     823     242                                                         821   -0.25   -0.08  1.0000
   0  -6  37       8     242                                                        -217   -0.46    1.97  1.0000
   0   6  37     516     231                                                         400    0.71   -1.97  1.0000
   0  -6  38       6     238                                                         -66   -1.30    1.17  1.0000
   0   6  38     236     205                                                         177   -1.03   -1.13  1.0000
   0  -6  39       4     255                                                         -40   -0.15    1.44  1.0000
   0   6  39     281     242                                                         228   -0.38   -1.39  1.0000
   0  -6  40     107     249                                                         143   -0.42    1.31  1.0000
   0   6  40     143     234                                                         199   -0.98   -1.30  1.0000
   0   8   0  209596    2037                                                      238900   -4.15   22.18  1.0000
   0   8   0  206948    1945                                                      236072   -4.15   22.18  1.0000
   0  -8   1    5308     153                                                        2754   12.01    8.88  1.0000
   0   8   1    5810     165                                                        2767   16.98   -8.63  1.0000
   0   8  -1    5251     170                                                        2714   12.01   -8.88  1.0000
   0   8   1    5754     140                                                        2728   16.98   -8.63  1.0000
   0  -8  -1    5975     153                                                        2877   16.98    8.63  1.0000
   0  -8   2   10086     219                                                        7177   -8.54  -12.31  1.0000
   0   8  -2   10221     218                                                        7289   -8.54   12.31  1.0000
   0   8   2    9459     182                                                        6854   -8.69   11.38  1.0000
   0  -8  -2    9770     204                                                        7125   -8.69  -11.38  1.0000
   0   8  -2    9680     180                                                        6829   -8.54   12.31  1.0000
   0  -8  -2    9737     197                                                        7096   -8.69  -11.38  1.0000
   0  -8   3   28618     648                                                       31138    7.89   -9.43  1.0000
   0   8  -3   28993     642                                                       31600    7.89    9.43  1.0000
   0   8   3   28588     333                                                       30512    6.49    9.46  1.0000
   0  -8  -3   30053     632                                                       31962    6.49   -9.46  1.0000
   0   8   3   26564     650                                                       28412    6.49    9.46  1.0000
   0  -8  -3   30375     626                                                       32295    6.49   -9.46  1.0000
   0   8  -3   29698     633                                                       32339    7.89    9.43  1.0000
   0  -8   4   64153    1317                                                       76317    3.65   16.68  1.0000
   0   8  -4   61958    1267                                                       73922    3.65  -16.68  1.0000
   0   8   4   62891    1240                                                       74275    2.34  -15.82  1.0000
   0  -8  -4   66173    1297                                                       77838    2.34   15.82  1.0000
   0   8   4   63845    1265                                                       75311    2.34  -15.82  1.0000
   0  -8  -4   66728    1291                                                       78440    2.34   15.82  1.0000
   0   8  -4   62604    1261                                                       74627    3.65  -16.68  1.0000
   0  -8   4   64829    1262                                                       77054    3.65   16.68  1.0000
   0  -8   5   21544     371                                                       15751  -16.30    7.30  1.0000
   0   8  -5   22710     376                                                       16690  -16.30   -7.30  1.0000
   0   8   5   21897     332                                                       16348  -15.34   -7.79  1.0000
   0  -8  -5   21283     341                                                       15880  -15.34    7.79  1.0000
   0   8   5   22444     365                                                       16823  -15.34   -7.79  1.0000
   0  -8  -5   22344     347                                                       16803  -15.34    7.79  1.0000
   0   8  -5   22918     364                                                       16869  -16.30   -7.30  1.0000
   0  -8   5   21875     327                                                       16035  -16.30    7.30  1.0000
   0  -8   6    7629     188                                                        3439   -0.81  -22.13  1.0000
   0   8  -6    7052     170                                                        3104   -0.81   22.13  1.0000
   0   8   6    6666     119                                                        2983    1.54   19.97  1.0000
   0  -8  -6    7177     141                                                        3313    1.54  -19.97  1.0000
   0   8   6    7002     157                                                        3210    1.54   19.97  1.0000
   0  -8  -6    7412     148                                                        3473    1.54  -19.97  1.0000
   0   8  -6    6842     131                                                        2963   -0.81   22.13  1.0000
   0  -8   6    7261     128                                                        3191   -0.81  -22.13  1.0000
   0  -8   7    1263     150                                                         873    2.35   -4.28  1.0000
   0   8  -7    1329     143                                                         928    2.35    4.28  1.0000
   0   8   7    1430      92                                                         990    1.63    4.54  1.0000
   0  -8  -7    1289     121                                                         873    1.63   -4.54  1.0000
   0   8   7    1266     125                                                         854    1.63    4.54  1.0000
   0  -8  -7    1348     136                                                         922    1.63   -4.54  1.0000
   0   8  -7    1229     103                                                         845    2.35    4.28  1.0000
   0  -8   7    1253     115                                                         865    2.35   -4.28  1.0000
   0  -8   8    3006     146                                                        1344  -15.70   -7.23  1.0000
   0   8  -8    2816     163                                                        1279  -15.70    7.23  1.0000
   0   8   8    2704     115                                                        1254  -16.85    9.67  1.0000
   0  -8  -8    2730     107                                                        1189  -16.85   -9.67  1.0000
   0   8   8    2782     122                                                        1315  -16.85    9.67  1.0000
   0  -8  -8    2868     141                                                        1292  -16.85   -9.67  1.0000
   0   8  -8    2745     123                                                        1228  -15.70    7.23  1.0000
   0  -8   8    2876     120                                                        1252  -15.70   -7.23  1.0000
   0  -8   9   10080     313                                                       12038   11.93    0.95  1.0000
   0   8  -9    9758     291                                                       11698   11.93   -0.95  1.0000
   0   8   9    8932     258                                                       11815   15.13    0.88  1.0000
   0  -8  -9    9199     279                                                       12108   15.13   -0.88  1.0000
   0   8   9    8310     279                                                       11090   15.13    0.88  1.0000
   0  -8  -9    9813     304                                                       12819   15.13   -0.88  1.0000
   0   8  -9   10722     300                                                       12760   11.93   -0.95  1.0000
   0  -8   9   10643     278                                                       12658   11.93    0.95  1.0000
   0  -8  10    1777     162                                                        1295    3.82    6.10  1.0000
   0   8 -10    1843     166                                                        1348    3.82   -6.10  1.0000
   0   8  10    2167     105                                                        1401    3.64   -8.49  1.0000
   0  -8 -10    1933     126                                                        1216    3.64    8.49  1.0000
   0   8  10    2004     118                                                        1267    3.64   -8.49  1.0000
   0  -8 -10    2101     125                                                        1353    3.64    8.49  1.0000
   0  -8  10    1801     123                                                        1316    3.82    6.10  1.0000
   0  -8  11    7272     225                                                        7036   -5.82   -6.41  1.0000
   0   8 -11    7429     210                                                        7178   -5.82    6.41  1.0000
   0   8  11    7362     173                                                        7065   -5.16    5.27  1.0000
   0  -8 -11    7439     202                                                        7153   -5.16   -5.27  1.0000
   0   8  11    6906     195                                                        6615   -5.16    5.27  1.0000
   0  -8 -11    7416     204                                                        7130   -5.16   -5.27  1.0000
   0   8 -11    7193     465                                                        6944   -5.82    6.41  1.0000
   0  -8  11    7164     179                                                        6929   -5.82   -6.41  1.0000
   0  -8  12   15542     324                                                       13743    1.67   -5.22  1.0000
   0   8 -12   15789     329                                                       13977    1.67    5.22  1.0000
   0   8  12   16310     300                                                       14545    1.91    4.84  1.0000
   0  -8 -12   15018     347                                                       13325    1.91   -4.84  1.0000
   0   8  12   15986     317                                                       14239    1.91    4.84  1.0000
   0  -8 -12   16437     261                                                       14664    1.91   -4.84  1.0000
   0   8 -12   16805     452                                                       14934    1.67    5.22  1.0000
   0  -8  12   16067     296                                                       14237    1.67   -5.22  1.0000
   0  -8  13    2239     193                                                        2838    6.31    1.99  1.0000
   0   8 -13    2203     162                                                        2794    6.31   -1.99  1.0000
   0   8  13    2520     149                                                        3122    6.83   -1.48  1.0000
   0  -8 -13    2044     309                                                        2586    6.83    1.48  1.0000
   0   8  13    2163     137                                                        2719    6.83   -1.48  1.0000
   0  -8 -13    2355     161                                                        2939    6.83    1.48  1.0000
   0   8 -13    2330     361                                                        2939    6.31   -1.99  1.0000
   0  -8  13    2200     139                                                        2793    6.31    1.99  1.0000
   0  -8  14    3427     186                                                        4917   -5.51    8.52  1.0000
   0   8 -14    3243     161                                                        4697   -5.51   -8.52  1.0000
   0   8  14    3759     163                                                        5264   -4.76   -8.27  1.0000
   0  -8 -14    3468     180                                                        4915   -4.76    8.27  1.0000
   0   8  14    3454     171                                                        4900   -4.76   -8.27  1.0000
   0  -8 -14    3825     187                                                        5341   -4.76    8.27  1.0000
   0   8 -14    3414     488                                                        4904   -5.51   -8.52  1.0000
   0  -8  14    3776     158                                                        5337   -5.51    8.52  1.0000
   0  -8  15   13701     336                                                       12828    7.18    1.75  1.0000
   0   8 -15   14025     317                                                       13154    7.18   -1.75  1.0000
   0   8  15   14245     306                                                       13640    7.19   -2.77  1.0000
   0  -8 -15   13196     324                                                       12599    7.19    2.77  1.0000
   0   8  15   13728     315                                                       13132    7.19   -2.77  1.0000
   0  -8 -15   13197     319                                                       12600    7.19    2.77  1.0000
   0   8 -15   13397     367                                                       12544    7.18   -1.75  1.0000
   0  -8  15   13424     283                                                       12559    7.18    1.75  1.0000
   0  -8  16    2497     179                                                        2560    2.49   -4.01  1.0000
   0   8 -16    2524     157                                                        2622    2.49    4.01  1.0000
   0   8  16    2535     149                                                        2754    2.87    2.63  1.0000
   0  -8 -16    2559     219                                                        2751    2.87   -2.63  1.0000
   0   8  16    2577     151                                                        2798    2.87    2.63  1.0000
   0  -8 -16    2651     160                                                        2847    2.87   -2.63  1.0000
   0   8 -16    2372     433                                                        2466    2.49    4.01  1.0000
   0  -8  16    2659     130                                                        2725    2.49   -4.01  1.0000
   0  -8  17    4233     336                                                        5631   -6.71    2.96  1.0000
   0   8 -17    4522     180                                                        5958   -6.71   -2.96  1.0000
   0   8  17    4854     177                                                        5976   -6.28   -0.38  1.0000
   0  -8 -17    4721     183                                                        5842   -6.28    0.38  1.0000
   0   8  17    4478     175                                                        5557   -6.28   -0.38  1.0000
   0  -8 -17    4536     247                                                        5636   -6.28    0.38  1.0000
   0   8 -17    3029     530                                                        4222   -6.71   -2.96  1.0000
   0  -8  17    4142     153                                                        5526   -6.71    2.96  1.0000
   0  -8  18   11583     417                                                       14323    0.42   14.43  1.0000
   0   8 -18   11108     373                                                       13730    0.42  -14.43  1.0000
   0   8  18   12646     397                                                       15593    0.94  -14.45  1.0000
   0  -8 -18   11936     381                                                       14856    0.94   14.45  1.0000
   0   8  18   11925     387                                                       14784    0.94  -14.45  1.0000
   0  -8 -18   12057     414                                                       14993    0.94   14.45  1.0000
   0  -8  18   11622     356                                                       14367    0.42   14.43  1.0000
   0  -8  19    4959     223                                                        5994   -6.47   -0.81  1.0000
   0   8 -19    4917     179                                                        5938   -6.47    0.81  1.0000
   0   8  19    4940     180                                                        6170   -6.99   -0.24  1.0000
   0   8  19    4485     174                                                        5659   -6.99   -0.24  1.0000
   0  -8 -19    4911     214                                                        6146   -6.99    0.24  1.0000
   0   8 -19    4703     444                                                        5702   -6.47    0.81  1.0000
   0  -8  19    4582     152                                                        5577   -6.47   -0.81  1.0000
   0  -8  20    1880     198                                                        1732   -2.50    2.38  1.0000
   0   8 -20    1792     149                                                        1636   -2.50   -2.38  1.0000
   0   8  20    1464     129                                                        1334   -2.42   -2.49  1.0000
   0   8  20    1500     141                                                        1369   -2.42   -2.49  1.0000
   0  -8  20    1601     118                                                        1463   -2.50    2.38  1.0000
   0  -8  21    1506     177                                                        1939    3.12    5.48  1.0000
   0   8 -21    1646     158                                                        2092    3.12   -5.48  1.0000
   0   8  21    1572     166                                                        2028    3.60   -3.44  1.0000
   0   8  21    1473     140                                                        1914    3.60   -3.44  1.0000
   0  -8  21    1752     131                                                        2220    3.12    5.48  1.0000
   0   8  22    1519     148                                                        1584    0.57   -2.58  1.0000
   0   8  22    1390     138                                                        1452    0.57   -2.58  1.0000
   0  -8  22    1336     123                                                        1530    1.87    2.51  1.0000
   0  -8  23    4001     233                                                        2914   -6.26    2.93  1.0000
   0   8  23    4128     165                                                        2970   -6.43   -3.59  1.0000
   0   8  23    4382     169                                                        3187   -6.43   -3.59  1.0000
   0  -8  23    4285     132                                                        3157   -6.26    2.93  1.0000
   0   8  24    1711     182                                                        1575   -0.81    3.69  1.0000
   0   8  24    1411     155                                                        1286   -0.81    3.69  1.0000
   0  -8  24    1498     118                                                        1357   -0.94   -3.69  1.0000
   0   8  25    2718     195                                                        2507   -1.42    0.51  1.0000
   0   8  25    2255     146                                                        2063   -1.42    0.51  1.0000
   0  -8 -25    2408     167                                                        2209   -1.42   -0.51  1.0000
   0   8 -25    2277     181                                                        2104   -1.83   -0.76  1.0000
   0  -8  25    2238     119                                                        2066   -1.83    0.76  1.0000
   0   8  26     321     156                                                         382    4.70   -4.87  1.0000
   0   8  26     276     132                                                         325    4.70   -4.87  1.0000
   0  -8 -26     298     154                                                         359    4.70    4.87  1.0000
   0   8 -26     324     166                                                         405    5.26   -5.26  1.0000
   0   8  27     313     153                                                         303   -1.42   -1.92  1.0000
   0   8  27     247     131                                                         237   -1.42   -1.92  1.0000
   0   8  28     322     165                                                         385   -0.54    2.41  1.0000
   0   8  28     307     140                                                         369   -0.54    2.41  1.0000
   0   8 -28     164     155                                                         178    0.01    1.62  1.0000
   0   8  29      34     157                                                          55    0.99   -1.28  1.0000
   0   8  29     104     135                                                         141    0.99   -1.28  1.0000
   0   8 -29     103     173                                                         131    0.44   -2.34  1.0000
   0  -8  30     279     186                                                         175    0.34   -3.52  1.0000
   0   8  30      21     170                                                         -79    1.08    3.18  1.0000
   0   8 -30      24     173                                                         -13    0.34    3.52  1.0000
   0  -8 -30      21     131                                                         -86    1.08   -3.18  1.0000
   0   8  31     458     176                                                         441   -0.96   -0.67  1.0000
   0   8 -31     100     158                                                          84   -1.48   -0.92  1.0000
   0  -8  32     171     196                                                         115    2.83   -0.74  1.0000
   0   8  32     343     164                                                         260    2.51    0.96  1.0000
   0  -8  34       4     224                                                         -44   -1.16    0.74  1.0000
   0  -8  35     230     234                                                         226    0.70    2.72  1.0000
   0  -8  36     290     208                                                         209    2.13   -1.53  1.0000
   0  -8  37     118     234                                                         208   -1.73    1.92  1.0000
   0  -8  38     238     245                                                         262    0.90    0.79  1.0000
   0  -8  39     639     248                                                         674   -0.55   -1.12  1.0000
   0  10   0   70001    1395                                                       85350   19.59   -4.65  1.0000
   0  10   0   70654    1399                                                       86071   19.59   -4.65  1.0000
   0  10   1    2308     161                                                        1584   -2.71   -6.25  1.0000
   0  10  -1    2218     175                                                        1602   -1.23   -6.80  1.0000
   0  10   1    2217     123                                                        1508   -2.71   -6.25  1.0000
   0  10  -1    2025     150                                                        1437   -1.23   -6.80  1.0000
   0 -10  -1    2183     123                                                        1496   -2.71    6.25  1.0000
   0  10   2   29297     683                                                       29358   -0.13    0.46  1.0000
   0 -10   2   29226     685                                                       29355   -0.32    2.22  1.0000
   0  10  -2   29126     707                                                       29276   -0.32   -2.22  1.0000
   0  10   2   28253     637                                                       28313   -0.13    0.46  1.0000
   0  10  -2   27837     631                                                       27984   -0.32   -2.22  1.0000
   0 -10  -2   29898     660                                                       29964   -0.13   -0.46  1.0000
   0 -10   3     841     136                                                        1131    1.48   -3.58  1.0000
   0  10  -3     748     148                                                        1022    1.48    3.58  1.0000
   0  10   3     515     120                                                         827    1.79    4.68  1.0000
   0 -10  -3     624     140                                                         965    1.79   -4.68  1.0000
   0  10   3     626     129                                                         967    1.79    4.68  1.0000
   0  10  -3     696     114                                                         960    1.48    3.58  1.0000
   0 -10  -3     694     142                                                        1052    1.79   -4.68  1.0000
   0 -10   4   25071     581                                                       24524   -0.83    5.23  1.0000
   0  10  -4   24942     598                                                       24431   -0.83   -5.23  1.0000
   0  10   4   25758     563                                                       25123   -0.53   -5.19  1.0000
   0 -10  -4   26642     586                                                       25962   -0.53    5.19  1.0000
   0  10   4   25475     569                                                       24843   -0.53   -5.19  1.0000
   0 -10  -4   26174     561                                                       25500   -0.53    5.19  1.0000
   0  10  -4   25337     557                                                       24823   -0.83   -5.23  1.0000
   0 -10   4   26021     553                                                       25465   -0.83    5.23  1.0000
   0 -10   5    9001     231                                                        7553    3.77    4.71  1.0000
   0  10  -5    9058     227                                                        7619    3.77   -4.71  1.0000
   0  10   5    9333     195                                                        7881    4.57   -3.42  1.0000
   0 -10  -5    9279     220                                                        7830    4.57    3.42  1.0000
   0  10   5    9297     202                                                        7848    4.57   -3.42  1.0000
   0 -10  -5    9499     213                                                        8033    4.57    3.42  1.0000
   0  10  -5    9338     207                                                        7876    3.77   -4.71  1.0000
   0 -10   5    9479     203                                                        7991    3.77    4.71  1.0000
   0 -10   6    6705     202                                                        5164    5.07    6.29  1.0000
   0  10  -6    6697     199                                                        5156    5.07   -6.29  1.0000
   0  10   6    6576     166                                                        4845    5.34   -7.31  1.0000
   0 -10  -6    6633     167                                                        4896    5.34    7.31  1.0000
   0  10   6    6553     165                                                        4825    5.34   -7.31  1.0000
   0 -10  -6    7164     180                                                        5354    5.34    7.31  1.0000
   0  10  -6    6529     174                                                        5008    5.07   -6.29  1.0000
   0 -10   6    6785     169                                                        5235    5.07    6.29  1.0000
   0 -10   7      87     151                                                         156    6.80   -7.81  1.0000
   0  10  -7     113     145                                                         267    6.80    7.81  1.0000
   0  10   7     132     107                                                         246    5.62    6.84  1.0000
   0 -10  -7      74     129                                                          83    5.62   -6.84  1.0000
   0  10   7     107     101                                                         189    5.62    6.84  1.0000
   0 -10  -7      95     107                                                         176    5.62   -6.84  1.0000
   0  10  -7      84     100                                                         127    6.80    7.81  1.0000
   0 -10   7      84      99                                                         112    6.80   -7.81  1.0000
   0 -10   8    1346     170                                                        1603   -2.84    3.36  1.0000
   0  10  -8    1090     162                                                        1312   -2.84   -3.36  1.0000
   0  10   8    1124     121                                                        1358   -2.96   -3.59  1.0000
   0 -10  -8    1163     141                                                        1411   -2.96    3.59  1.0000
   0  10   8    1180     130                                                        1421   -2.96   -3.59  1.0000
   0 -10  -8    1361     144                                                        1630   -2.96    3.59  1.0000
   0  10  -8    1187     142                                                        1419   -2.84   -3.36  1.0000
   0 -10   8    1354     117                                                        1612   -2.84    3.36  1.0000
   0 -10   9    1106     166                                                         659    5.81    1.82  1.0000
   0  10  -9     868     177                                                         482    5.81   -1.82  1.0000
   0  10   9     844      97                                                         483    5.17   -0.08  1.0000
   0 -10  -9     863     111                                                         497    5.17    0.08  1.0000
   0  10   9     816     117                                                         462    5.17   -0.08  1.0000
   0 -10  -9    1014     140                                                         613    5.17    0.08  1.0000
   0 -10   9     996     121                                                         574    5.81    1.82  1.0000
   0 -10  10    3841     196                                                        3718    0.83  -10.82  1.0000
   0  10 -10    3747     191                                                        3633    0.83   10.82  1.0000
   0  10  10    3587     133                                                        3273    2.15   11.44  1.0000
   0 -10 -10    3714     168                                                        3389    2.15  -11.44  1.0000
   0  10  10    3564     157                                                        3250    2.15   11.44  1.0000
   0 -10 -10    4020     167                                                        3692    2.15  -11.44  1.0000
   0  10 -10    3561     457                                                        3444    0.83   10.82  1.0000
   0 -10  10    3732     158                                                        3608    0.83  -10.82  1.0000
   0 -10  11   10249     264                                                        8648  -10.08   -2.03  1.0000
   0  10 -11   10988     255                                                        9315  -10.08    2.03  1.0000
   0  10  11   11306     229                                                        9841   -8.68    1.68  1.0000
   0 -10 -11   11507     252                                                       10046   -8.68   -1.68  1.0000
   0  10  11   11159     244                                                        9703   -8.68    1.68  1.0000
   0 -10 -11   12017     267                                                       10525   -8.68   -1.68  1.0000
   0  10 -11   11061     274                                                        9382  -10.08    2.03  1.0000
   0 -10  11   11511     224                                                        9818  -10.08   -2.03  1.0000
   0 -10  12    3700     186                                                        2684    5.24    3.99  1.0000
   0  10 -12    3440     173                                                        2462    5.24   -3.99  1.0000
   0  10  12    3395     123                                                        2356    4.72   -5.49  1.0000
   0 -10 -12    3517     179                                                        2454    4.72    5.49  1.0000
   0  10  12    3668     159                                                        2584    4.72   -5.49  1.0000
   0 -10 -12    3674     143                                                        2585    4.72    5.49  1.0000
   0  10 -12    3443     270                                                        2465    5.24   -3.99  1.0000
   0 -10  12    3685     143                                                        2671    5.24    3.99  1.0000
   0 -10  13    3455     199                                                        3604   -3.10    1.16  1.0000
   0  10 -13    3424     171                                                        3572   -3.10   -1.16  1.0000
   0  10  13    3631     137                                                        3653   -5.15   -0.39  1.0000
   0 -10 -13    3642     191                                                        3664   -5.15    0.39  1.0000
   0  10  13    3554     172                                                        3575   -5.15   -0.39  1.0000
   0 -10 -13    3792     167                                                        3816   -5.15    0.39  1.0000
   0  10 -13    3745     185                                                        3900   -3.10   -1.16  1.0000
   0 -10  13    3613     149                                                        3766   -3.10    1.16  1.0000
   0 -10  14     405     218                                                         353    3.77    2.43  1.0000
   0  10 -14     231     145                                                         184    3.77   -2.43  1.0000
   0  10  14     356     122                                                         330    3.70   -1.87  1.0000
   0 -10 -14     332     192                                                         304    3.70    1.87  1.0000
   0  10  14     517     150                                                         492    3.70   -1.87  1.0000
   0 -10 -14     427     131                                                         400    3.70    1.87  1.0000
   0 -10  14     507     116                                                         453    3.77    2.43  1.0000
   0 -10  15    8838     311                                                        9334    0.12   -2.01  1.0000
   0  10 -15    8400     212                                                        8883    0.12    2.01  1.0000
   0  10  15    8010     176                                                        8506    0.95    2.35  1.0000
   0 -10 -15    8466     211                                                        8977    0.95   -2.35  1.0000
   0  10  15    8390     219                                                        8898    0.95    2.35  1.0000
   0 -10 -15    8027     203                                                        8525    0.95   -2.35  1.0000
   0  10 -15    8336     481                                                        8818    0.12    2.01  1.0000
   0 -10  15    8008     181                                                        8481    0.12   -2.01  1.0000
   0 -10  16    8341     385                                                        9050    0.56   -6.83  1.0000
   0  10 -16    8053     205                                                        8775    0.56    6.83  1.0000
   0  10  16    8626     276                                                        9178   -0.29    6.92  1.0000
   0 -10 -16    7954     244                                                        8454   -0.29   -6.92  1.0000
   0  10  16    8643     290                                                        9196   -0.29    6.92  1.0000
   0 -10 -16    8529     228                                                        9049   -0.29   -6.92  1.0000
   0  10 -16    7857     414                                                        8570    0.56    6.83  1.0000
   0 -10  16    8048     187                                                        8744    0.56   -6.83  1.0000
   0 -10  17    7663     259                                                        6700    2.93    3.32  1.0000
   0  10 -17    7250     193                                                        6323    2.93   -3.32  1.0000
   0  10  17    7405     191                                                        6586    2.39   -3.23  1.0000
   0 -10 -17    7070     244                                                        6260    2.39    3.23  1.0000
   0  10  17    7147     204                                                        6342    2.39   -3.23  1.0000
   0 -10 -17    7333     208                                                        6508    2.39    3.23  1.0000
   0  10 -17    6873     267                                                        5971    2.93   -3.32  1.0000
   0 -10  17    7147     169                                                        6218    2.93    3.32  1.0000
   0 -10  18    1990     307                                                        2759    5.49    6.58  1.0000
   0  10 -18    1868     167                                                        2589    5.49   -6.58  1.0000
   0  10  18    1985     170                                                        2751    5.73   -5.60  1.0000
   0  10  18    1724     156                                                        2438    5.73   -5.60  1.0000
   0 -10 -18    1978     175                                                        2763    5.73    5.60  1.0000
   0  10 -18    1884     332                                                        2609    5.49   -6.58  1.0000
   0 -10  18    1779     137                                                        2505    5.49    6.58  1.0000
   0 -10  19    4294     234                                                        4588   -1.99   -0.85  1.0000
   0  10 -19    3585     168                                                        3850   -1.99    0.85  1.0000
   0  10  19    4262     180                                                        4454   -1.06   -0.20  1.0000
   0  10  19    3844     180                                                        4026   -1.06   -0.20  1.0000
   0 -10 -19    4180     189                                                        4371   -1.06    0.20  1.0000
   0 -10  19    3238     129                                                        3493   -1.99   -0.85  1.0000
   0 -10  20     628     168                                                         338   -2.75    4.19  1.0000
   0  10 -20     318     144                                                         126   -2.75   -4.19  1.0000
   0  10  20     529     131                                                         283   -2.58   -3.95  1.0000
   0  10  20     567     141                                                         311   -2.58   -3.95  1.0000
   0 -10  20     478     117                                                         230   -2.75    4.19  1.0000
   0 -10  21     370     196                                                         296    2.39    0.46  1.0000
   0  10 -21     518     139                                                         432    2.39   -0.46  1.0000
   0  10  21     571     134                                                         535    1.69    0.21  1.0000
   0  10  21     507     136                                                         473    1.69    0.21  1.0000
   0 -10 -21     453     150                                                         420    1.69   -0.21  1.0000
   0 -10  21     420     115                                                         341    2.39    0.46  1.0000
   0 -10  22    1251     206                                                        1078    1.70    0.81  1.0000
   0  10  22    1290     164                                                        1095    1.65   -2.62  1.0000
   0  10  22    1240     147                                                        1049    1.65   -2.62  1.0000
   0  10 -22    1046     181                                                         891    1.70   -0.81  1.0000
   0 -10  22    1064     119                                                         905    1.70    0.81  1.0000
   0 -10  23    1621     187                                                        1540    0.69    0.56  1.0000
   0  10  23    1673     154                                                        1573   -0.01   -0.95  1.0000
   0  10  23    1544     158                                                        1448   -0.01   -0.95  1.0000
   0 -10  23    1477     129                                                        1399    0.69    0.56  1.0000
   0 -10  24    3056     244                                                        3064   -0.16    0.67  1.0000
   0  10  24    2976     166                                                        2964    0.14    0.41  1.0000
   0  10  24    2980     163                                                        2968    0.14    0.41  1.0000
   0 -10  24    2939     136                                                        2947   -0.16    0.67  1.0000
   0  10  25    3675     208                                                        3812    3.14    1.63  1.0000
   0  10  25    3073     161                                                        3196    3.14    1.63  1.0000
   0 -10 -25    3315     185                                                        3442    3.14   -1.63  1.0000
   0  10 -25    3433     245                                                        3558    2.96    1.55  1.0000
   0 -10  25    3004     132                                                        3119    2.96   -1.55  1.0000
   0  10  26    2120     196                                                        2033    1.23   -0.06  1.0000
   0  10  26    1960     145                                                        1876    1.23   -0.06  1.0000
   0 -10  26    1936     119                                                        1863    1.82   -0.37  1.0000
   0 -10  27    3899     253                                                        4076   -1.51   -0.68  1.0000
   0  10  27    3671     184                                                        3890   -2.41    0.71  1.0000
   0  10  27    2850     149                                                        3042   -2.41    0.71  1.0000
   0  10 -27    3593     207                                                        3764   -1.51    0.68  1.0000
   0 -10  27    3241     133                                                        3402   -1.51   -0.68  1.0000
   0  10  28     679     155                                                         737   -0.81    0.43  1.0000
   0  10  28     598     140                                                         652   -0.81    0.43  1.0000
   0  10  29    1508     194                                                        1410    4.51   -2.72  1.0000
   0  10  29    1319     155                                                        1224    4.51   -2.72  1.0000
   0  10 -29    1101     180                                                        1028    4.21   -2.34  1.0000
   0  10  30     490     190                                                         541   -0.59    1.15  1.0000
   0  10  30     239     135                                                         274   -0.59    1.15  1.0000
   0  10 -30     309     168                                                         288    0.61    0.82  1.0000
   0 -10  31     285     221                                                         485    3.75   -0.59  1.0000
   0  10  31     222     194                                                         372    3.15    0.72  1.0000
   0  10  31     376     149                                                         565    3.15    0.72  1.0000
   0  10 -31     363     182                                                         583    3.75    0.59  1.0000
   0  10  32     106     199                                                          73    1.19    0.83  1.0000
   0 -10  33      24     227                                                          45    1.44    1.94  1.0000
   0  10  33     232     206                                                         300    1.58   -0.94  1.0000
   0  10  34      94     205                                                         167   -1.54   -1.79  1.0000
   0 -10  35       7     237                                                        -295    1.72   -0.93  1.0000
   0  10  35      82     214                                                         106    0.53    1.51  1.0000
   0 -10  36      21     202                                                          28   -2.68    0.96  1.0000
   0  10  36      17     226                                                          14   -2.64   -1.44  1.0000
   0  10  37      28     226                                                          23    0.48   -0.58  1.0000
   0 -10  38       3     242                                                           8   -0.70    0.91  1.0000
   0  10  38     478     235                                                         524   -0.06   -0.78  1.0000
   0  12   0    1254     160                                                        1090   -1.10    2.60  1.0000
   0  12   0    1241     149                                                        1078   -1.10    2.60  1.0000
   0  12   1    5089     201                                                        4672    4.75    1.93  1.0000
   0  12  -1    4956     196                                                        4421    5.75    1.95  1.0000
   0  12   1    5247     185                                                        4824    4.75    1.93  1.0000
   0  12  -1    5344     188                                                        4790    5.75    1.95  1.0000
   0 -12  -1    5268     164                                                        4820    4.75   -1.93  1.0000
   0  12   2     875     145                                                         655    2.82    0.98  1.0000
   0  12  -2     758     153                                                         524    4.47   -0.41  1.0000
   0  12   2     832     123                                                         618    2.82    0.98  1.0000
   0  12  -2     937     133                                                         676    4.47   -0.41  1.0000
   0  12  -2     969     115                                                         704    4.47   -0.41  1.0000
   0 -12  -2     721     110                                                         521    2.82   -0.98  1.0000
   0  12   3    9579     316                                                       11858   -7.11    5.83  1.0000
   0 -12   3    9870     316                                                       11957   -6.64   -4.46  1.0000
   0  12  -3    9742     312                                                       11820   -6.64    4.46  1.0000
   0  12   3   10196     301                                                       12544   -7.11    5.83  1.0000
   0  12   3    8849     274                                                       11042   -7.11    5.83  1.0000
   0  12  -3   10309     293                                                       12445   -6.64    4.46  1.0000
   0 -12  -3    9855     283                                                       12159   -7.11   -5.83  1.0000
   0 -12   4    2728     172                                                        3057    0.91   -7.68  1.0000
   0  12  -4    2836     201                                                        3159    0.91    7.68  1.0000
   0  12   4    2850     158                                                        3068    0.54    6.22  1.0000
   0 -12  -4    2713     175                                                        2936    0.54   -6.22  1.0000
   0  12   4    2863     178                                                        3082    0.54    6.22  1.0000
   0  12  -4    2512     163                                                        2810    0.91    7.68  1.0000
   0 -12  -4    2783     166                                                        3010    0.54   -6.22  1.0000
   0 -12   4    2930     162                                                        3274    0.91   -7.68  1.0000
   0 -12   5    5959     236                                                        6579    3.53   -0.10  1.0000
   0  12  -5    5899     232                                                        6519    3.53    0.10  1.0000
   0  12   5    5970     189                                                        6658    3.28   -0.79  1.0000
   0 -12  -5    5768     209                                                        6443    3.28    0.79  1.0000
   0  12   5    5589     203                                                        6255    3.28   -0.79  1.0000
   0 -12  -5    5746     185                                                        6420    3.28    0.79  1.0000
   0  12  -5    5970     203                                                        6593    3.53    0.10  1.0000
   0 -12   5    5867     189                                                        6483    3.53   -0.10  1.0000
   0 -12   6    6097     200                                                        4937    0.94  -10.45  1.0000
   0  12  -6    6449     216                                                        5268    0.94   10.45  1.0000
   0  12   6    6728     174                                                        5218   -0.17   11.52  1.0000
   0 -12  -6    6689     198                                                        5173   -0.17  -11.52  1.0000
   0  12   6    6559     192                                                        5067   -0.17   11.52  1.0000
   0 -12  -6    6767     189                                                        5242   -0.17  -11.52  1.0000
   0  12  -6    6246     186                                                        5083    0.94   10.45  1.0000
   0 -12   6    6127     174                                                        4964    0.94  -10.45  1.0000
   0 -12   7    7700     279                                                        9516    4.33    6.04  1.0000
   0  12  -7    7648     286                                                        9459    4.33   -6.04  1.0000
   0  12   7    7770     224                                                        9376    2.67   -5.77  1.0000
   0 -12  -7    8091     259                                                        9728    2.67    5.77  1.0000
   0  12   7    7955     251                                                        9579    2.67   -5.77  1.0000
   0 -12  -7    8389     257                                                       10054    2.67    5.77  1.0000
   0  12  -7    8088     492                                                        9948    4.33   -6.04  1.0000
   0 -12   7    7727     237                                                        9546    4.33    6.04  1.0000
   0 -12   8   10818     280                                                        9967    0.19   -3.38  1.0000
   0  12  -8   10649     274                                                        9804    0.19    3.38  1.0000
   0  12   8   11433     246                                                       10324    1.43    3.64  1.0000
   0 -12  -8   10642     255                                                        9573    1.43   -3.64  1.0000
   0  12   8   10948     253                                                        9863    1.43    3.64  1.0000
   0 -12  -8   10997     256                                                        9910    1.43   -3.64  1.0000
   0  12  -8   10783     411                                                        9933    0.19    3.38  1.0000
   0 -12   8   10726     239                                                        9879    0.19   -3.38  1.0000
   0 -12   9    5803     234                                                        7631    7.13   -7.21  1.0000
   0  12  -9    5446     216                                                        7257    7.13    7.21  1.0000
   0  12   9    5549     176                                                        7581    8.63    4.46  1.0000
   0 -12  -9    5667     209                                                        7697    8.63   -4.46  1.0000
   0  12   9    5811     222                                                        7887    8.63    4.46  1.0000
   0 -12  -9    5768     212                                                        7814    8.63   -4.46  1.0000
   0  12  -9    6390     252                                                        8346    7.13    7.21  1.0000
   0 -12   9    5955     191                                                        7807    7.13   -7.21  1.0000
   0 -12  10      56     152                                                         384  -10.11   -9.42  1.0000
   0  12 -10     129     151                                                         457  -10.11    9.42  1.0000
   0  12  10     116     105                                                         418   -9.85    9.95  1.0000
   0 -12 -10      55     130                                                         395   -9.85   -9.95  1.0000
   0  12  10     122     148                                                         446   -9.85    9.95  1.0000
   0 -12 -10      61     117                                                         438   -9.85   -9.95  1.0000
   0  12 -10     103     153                                                         306  -10.11    9.42  1.0000
   0 -12  10      62     126                                                         428  -10.11   -9.42  1.0000
   0 -12  11    2062     194                                                        1831   -1.20   -1.75  1.0000
   0  12 -11    1831     167                                                        1621   -1.20    1.75  1.0000
   0  12  11    1850     147                                                        1614   -1.05    2.64  1.0000
   0 -12 -11    1760     182                                                        1517   -1.05   -2.64  1.0000
   0  12  11    1710     162                                                        1483   -1.05    2.64  1.0000
   0 -12 -11    1944     257                                                        1689   -1.05   -2.64  1.0000
   0 -12  11    1796     138                                                        1581   -1.20   -1.75  1.0000
   0 -12  12   32344     571                                                       32793   -0.47   -1.53  1.0000
   0  12 -12   31399     541                                                       31834   -0.47    1.53  1.0000
   0  12  12   33458     520                                                       33475   -0.25    0.25  1.0000
   0 -12 -12   32990     539                                                       33009   -0.25   -0.25  1.0000
   0  12  12   32618     540                                                       32635   -0.25    0.25  1.0000
   0 -12 -12   35051     565                                                       35071   -0.25   -0.25  1.0000
   0  12 -12   34357     653                                                       34812   -0.47    1.53  1.0000
   0 -12  12   32846     516                                                       33299   -0.47   -1.53  1.0000
   0 -12  13    5927     235                                                        6671    2.16    3.04  1.0000
   0  12 -13    5379     213                                                        6090    2.16   -3.04  1.0000
   0  12  13    5408     182                                                        6160    1.39   -3.40  1.0000
   0 -12 -13    4991     245                                                        5714    1.39    3.40  1.0000
   0  12  13    5260     207                                                        6002    1.39   -3.40  1.0000
   0 -12 -13    5772     259                                                        6548    1.39    3.40  1.0000
   0  12 -13    4656     623                                                        5319    2.16   -3.04  1.0000
   0 -12  13    5223     174                                                        5922    2.16    3.04  1.0000
   0 -12  14   18888     524                                                       19813   -5.20   -4.90  1.0000
   0  12 -14   18699     504                                                       19607   -5.20    4.90  1.0000
   0  12  14   19400     500                                                       20820   -5.21    6.26  1.0000
   0 -12 -14   17327     493                                                       18678   -5.21   -6.26  1.0000
   0  12  14   18285     516                                                       19662   -5.21    6.26  1.0000
   0 -12 -14   19360     520                                                       20792   -5.21   -6.26  1.0000
   0  12 -14   18515     561                                                       19418   -5.20    4.90  1.0000
   0 -12  14   19156     483                                                       20088   -5.20   -4.90  1.0000
   0 -12  15    5201     233                                                        5826    2.49    2.03  1.0000
   0  12 -15    4944     199                                                        5554    2.49   -2.03  1.0000
   0  12  15    5189     165                                                        5734    2.13   -1.90  1.0000
   0 -12 -15    4648     407                                                        5165    2.13    1.90  1.0000
   0  12  15    5093     206                                                        5633    2.13   -1.90  1.0000
   0 -12 -15    5009     194                                                        5546    2.13    1.90  1.0000
   0  12 -15    4794     684                                                        5395    2.49   -2.03  1.0000
   0 -12  15    4771     168                                                        5371    2.49    2.03  1.0000
   0 -12  16     460     209                                                         798    5.62    4.16  1.0000
   0  12 -16     354     147                                                         650    5.62   -4.16  1.0000
   0  12  16     490     148                                                         795    5.07   -4.78  1.0000
   0 -12 -16     400     183                                                         674    5.07    4.78  1.0000
   0  12  16     391     137                                                         661    5.07   -4.78  1.0000
   0 -12 -16     496     155                                                         804    5.07    4.78  1.0000
   0  12 -16     365     219                                                         665    5.62   -4.16  1.0000
   0 -12  16     447     131                                                         780    5.62    4.16  1.0000
   0 -12  17    1493     210                                                        1369   -0.99    2.09  1.0000
   0  12 -17    1602     166                                                        1477   -0.99   -2.09  1.0000
   0  12  17    1696     159                                                        1619   -2.00   -2.32  1.0000
   0  12  17    1435     170                                                        1363   -2.00   -2.32  1.0000
   0 -12 -17    1526     157                                                        1448   -2.00    2.32  1.0000
   0  12 -17    1175     228                                                        1067   -0.99   -2.09  1.0000
   0 -12  17    1509     135                                                        1385   -0.99    2.09  1.0000
   0 -12  18    4194     231                                                        4598    2.72    0.58  1.0000
   0  12 -18    3959     188                                                        4351    2.72   -0.58  1.0000
   0  12  18    4078     186                                                        4482    3.24   -0.16  1.0000
   0  12  18    3654     198                                                        4037    3.24   -0.16  1.0000
   0 -12 -18    3528     166                                                        3904    3.24    0.16  1.0000
   0  12 -18    3431     205                                                        3797    2.72   -0.58  1.0000
   0 -12  18    3530     156                                                        3901    2.72    0.58  1.0000
   0 -12  19     168     205                                                          36   -5.03    4.42  1.0000
   0  12 -19     150     153                                                          24   -5.03   -4.42  1.0000
   0  12  19     273     164                                                         101   -4.61   -3.13  1.0000
   0  12  19     229     160                                                          74   -4.61   -3.13  1.0000
   0 -12 -19      58     142                                                         -36   -4.61    3.13  1.0000
   0 -12  19      85     120                                                          -2   -5.03    4.42  1.0000
   0 -12  20    1453     228                                                        1705    4.18   -0.64  1.0000
   0  12 -20    1173     163                                                        1406    4.18    0.64  1.0000
   0  12  20    1640     173                                                        1836    1.98    1.06  1.0000
   0  12  20    1371     171                                                        1551    1.98    1.06  1.0000
   0 -12 -20    1624     170                                                        1816    1.98   -1.06  1.0000
   0  12 -20    1523     197                                                        1790    4.18    0.64  1.0000
   0 -12  20    1306     139                                                        1544    4.18   -0.64  1.0000
   0 -12  21    1615     231                                                        1786    0.40    1.47  1.0000
   0  12 -21    1412     158                                                        1573    0.40   -1.47  1.0000
   0  12  21    1683     154                                                        1883    0.40   -1.69  1.0000
   0  12  21    1346     173                                                        1526    0.40   -1.69  1.0000
   0 -12 -21    1662     170                                                        1861    0.40    1.69  1.0000
   0 -12  21    1508     136                                                        1674    0.40    1.47  1.0000
   0 -12  22    4548     246                                                        4248    0.28    1.91  1.0000
   0  12  22    4833     194                                                        4498    1.28   -2.53  1.0000
   0  12  22    4195     186                                                        3883    1.28   -2.53  1.0000
   0  12 -22    4477     230                                                        4181    0.28   -1.91  1.0000
   0 -12  22    4049     147                                                        3766    0.28    1.91  1.0000
   0 -12  23    1322     227                                                        1368    0.23    0.43  1.0000
   0  12  23    1084     181                                                        1206   -0.28   -1.36  1.0000
   0  12  23     912     155                                                        1025   -0.28   -1.36  1.0000
   0 -12  23    1159     131                                                        1202    0.23    0.43  1.0000
   0 -12  24     489     218                                                         590    0.59   -1.48  1.0000
   0  12  24     621     176                                                         801    1.20    2.18  1.0000
   0  12  24     409     144                                                         557    1.20    2.18  1.0000
   0 -12  25     178     210                                                         158   -0.29   -0.49  1.0000
   0  12  25     317     147                                                         265    0.74    1.86  1.0000
   0  12  25     166     138                                                         127    0.74    1.86  1.0000
   0 -12 -25     132     160                                                          97    0.74   -1.86  1.0000
   0  12  26     706     175                                                         696    1.50   -0.57  1.0000
   0  12  26     580     137                                                         570    1.50   -0.57  1.0000
   0  12 -26     636     186                                                         620    1.51   -0.48  1.0000
   0 -12  27     180     189                                                         271   -1.69   -1.68  1.0000
   0  12  27     208     172                                                         273   -1.57    0.95  1.0000
   0  12  27      22     151                                                          45   -1.57    0.95  1.0000
   0  12  28    1020     157                                                         949   -2.73    3.57  1.0000
   0  12  28     708     135                                                         643   -2.73    3.57  1.0000
   0  12 -28     964     188                                                         853   -2.87    4.48  1.0000
   0 -12  29      18     221                                                        -149   -2.23   -2.16  1.0000
   0  12  29      24     157                                                         -70   -2.17    2.84  1.0000
   0  12  29      24     133                                                         -25   -2.17    2.84  1.0000
   0  12 -29      18     189                                                         -58   -2.23    2.16  1.0000
   0  12  30     377     191                                                         435   -0.02    1.29  1.0000
   0  12  30     193     146                                                         235   -0.02    1.29  1.0000
   0  12 -30     113     177                                                         139   -0.89    1.68  1.0000
   0  12  31     206     197                                                         207   -2.05   -0.54  1.0000
   0  12  31      15     138                                                           8   -2.05   -0.54  1.0000
   0  12 -31       9     171                                                         -40   -2.22   -0.30  1.0000
   0  12  32     408     197                                                         425    1.38   -0.24  1.0000
   0  12  33     174     204                                                         258    0.33    3.53  1.0000
   0 -12  34     347     228                                                         270    0.22    3.18  1.0000
   0  12  34      30     209                                                        -107    1.08   -3.83  1.0000
   0  12  35     206     216                                                         241   -0.58    0.92  1.0000
   0  12  36     271     216                                                         497   -1.51    4.01  1.0000
   0  12  37      12     225                                                         -46    0.47   -2.43  1.0000
   0 -12  38       1     241                                                         -66    0.46    0.31  1.0000
   0  12  38     183     223                                                         198    0.62   -0.26  1.0000
   0  14   0    8499     269                                                        8728    1.15   -0.43  1.0000
   0  14   0    8400     244                                                        8627    1.15   -0.43  1.0000
   0  14   1    4877     216                                                        5422    1.67   -5.28  1.0000
   0  14  -1    4819     216                                                        5468    0.96   -5.38  1.0000
   0  14   1    4670     189                                                        5203    1.67   -5.28  1.0000
   0  14  -1    4239     188                                                        4847    0.96   -5.38  1.0000
   0 -14  -1    4803     171                                                        5329    1.67    5.28  1.0000
   0  14   2   21016     451                                                       18158   -3.89    6.40  1.0000
   0  14  -2   20902     476                                                       17889   -2.96    7.70  1.0000
   0  14   2   21489     450                                                       18598   -3.89    6.40  1.0000
   0  14  -2   21393     448                                                       18344   -2.96    7.70  1.0000
   0  14  -2   20239     412                                                       17276   -2.96    7.70  1.0000
   0 -14  -2   21135     422                                                       18267   -3.89   -6.40  1.0000
   0  14   3    4107     213                                                        5688    3.23    7.92  1.0000
   0  14  -3    4247     224                                                        5947    4.55    7.48  1.0000
   0  14   3    4446     195                                                        6086    3.23    7.92  1.0000
   0  14  -3    4654     508                                                        6427    4.55    7.48  1.0000
   0 -14  -3    4860     183                                                        6573    3.23   -7.92  1.0000
   0 -14   3    4285     185                                                        5993    4.55   -7.48  1.0000
   0  14   4   44781     715                                                       44262   -0.84    0.42  1.0000
   0 -14   4   44533     720                                                       44300   -1.20    0.62  1.0000
   0  14  -4   44328     732                                                       44093   -1.20   -0.62  1.0000
   0  14   4   44726     681                                                       44208   -0.84    0.42  1.0000
   0  14   4   44594     698                                                       44076   -0.84    0.42  1.0000
   0  14  -4   45597     498                                                       45359   -1.20   -0.62  1.0000
   0 -14  -4   46252     402                                                       45725   -0.84   -0.42  1.0000
   0 -14   4   44612     677                                                       44379   -1.20    0.62  1.0000
   0 -14   5   10782     338                                                       12429   -4.85   -2.96  1.0000
   0  14  -5   11246     344                                                       12920   -4.85    2.96  1.0000
   0  14   5   10717     308                                                       12459   -4.73    4.29  1.0000
   0 -14  -5   10038     312                                                       11737   -4.73   -4.29  1.0000
   0  14   5   10287     312                                                       11994   -4.73    4.29  1.0000
   0  14  -5   10889     455                                                       12537   -4.85    2.96  1.0000
   0 -14  -5   10483     297                                                       12218   -4.73   -4.29  1.0000
   0 -14   5   10629     302                                                       12264   -4.85   -2.96  1.0000
   0 -14   6   11455     349                                                       13337    3.62    5.26  1.0000
   0  14  -6   11849     355                                                       13750    3.62   -5.26  1.0000
   0  14   6   11804     324                                                       13835    3.46   -6.10  1.0000
   0 -14  -6   11893     344                                                       13948    3.46    6.10  1.0000
   0  14   6   11453     329                                                       13455    3.46   -6.10  1.0000
   0  14  -6   11853     362                                                       13754    3.62   -5.26  1.0000
   0 -14  -6   11576     317                                                       13605    3.46    6.10  1.0000
   0 -14   6   11390     302                                                       13267    3.62    5.26  1.0000
   0 -14   7    1175     167                                                        1733   -0.30   -7.20  1.0000
   0  14  -7    1352     174                                                        1940   -0.30    7.20  1.0000
   0  14   7    1404     146                                                        1954   -0.87    6.17  1.0000
   0 -14  -7    1394     165                                                        1950   -0.87   -6.17  1.0000
   0  14   7    1333     171                                                        1869   -0.87    6.17  1.0000
   0  14  -7    1228     146                                                        1788   -0.30    7.20  1.0000
   0 -14  -7    1184     148                                                        1698   -0.87   -6.17  1.0000
   0 -14   7    1165     125                                                        1720   -0.30   -7.20  1.0000
   0 -14   8    1139     178                                                         700   -2.51    5.57  1.0000
   0  14  -8    1247     159                                                         787   -2.51   -5.57  1.0000
   0  14   8    1216     130                                                         774   -3.33   -5.54  1.0000
   0 -14  -8    1177     147                                                         742   -3.33    5.54  1.0000
   0  14   8    1111     131                                                         690   -3.33   -5.54  1.0000
   0 -14  -8     989     141                                                         592   -3.33    5.54  1.0000
   0  14  -8    1134     164                                                         697   -2.51   -5.57  1.0000
   0 -14   8    1164     133                                                         720   -2.51    5.57  1.0000
   0 -14   9    2305     188                                                        1980    4.85   -1.04  1.0000
   0  14  -9    2235     175                                                        1914    4.85    1.04  1.0000
   0  14   9    2229     149                                                        1747    5.71    2.26  1.0000
   0 -14  -9    2173     154                                                        1698    5.71   -2.26  1.0000
   0  14   9    2198     175                                                        1719    5.71    2.26  1.0000
   0 -14  -9    2274     139                                                        1788    5.71   -2.26  1.0000
   0  14  -9    2035     205                                                        1728    4.85    1.04  1.0000
   0 -14   9    2092     124                                                        1782    4.85   -1.04  1.0000
   0 -14  10    2983     181                                                        2311   -3.72    3.01  1.0000
   0  14 -10    2834     175                                                        2179   -3.72   -3.01  1.0000
   0  14  10    3092     156                                                        2389   -3.72   -3.19  1.0000
   0 -14 -10    2876     165                                                        2201   -3.72    3.19  1.0000
   0  14  10    2735     182                                                        2077   -3.72   -3.19  1.0000
   0 -14 -10    2879     143                                                        2203   -3.72    3.19  1.0000
   0  14 -10    2705     214                                                        2066   -3.72   -3.01  1.0000
   0 -14  10    2820     148                                                        2168   -3.72    3.01  1.0000
   0 -14  11    2967     206                                                        2253   -2.27   -5.79  1.0000
   0  14 -11    2771     174                                                        2083   -2.27    5.79  1.0000
   0  14  11    3059     153                                                        2455   -2.65    4.97  1.0000
   0 -14 -11    2448     159                                                        1908   -2.65   -4.97  1.0000
   0  14  11    2822     171                                                        2242   -2.65    4.97  1.0000
   0 -14 -11    2992     165                                                        2394   -2.65   -4.97  1.0000
   0  14 -11    3203     192                                                        2461   -2.27    5.79  1.0000
   0 -14  11    2927     148                                                        2218   -2.27   -5.79  1.0000
   0 -14  12    1144     185                                                        1749    4.48    3.73  1.0000
   0  14 -12    1095     172                                                        1688    4.48   -3.73  1.0000
   0  14  12    1425     136                                                        1949    4.11   -2.32  1.0000
   0 -14 -12    1337     165                                                        1847    4.11    2.32  1.0000
   0  14  12    1289     184                                                        1789    4.11   -2.32  1.0000
   0 -14 -12    1528     162                                                        2070    4.11    2.32  1.0000
   0  14 -12    1129     233                                                        1731    4.48   -3.73  1.0000
   0 -14  12    1291     146                                                        1930    4.48    3.73  1.0000
   0 -14  13    2901     198                                                        2557    1.98    1.40  1.0000
   0  14 -13    2486     188                                                        2168    1.98   -1.40  1.0000
   0  14  13    2488     136                                                        2193    2.51   -0.60  1.0000
   0 -14 -13    2434     166                                                        2145    2.51    0.60  1.0000
   0  14  13    2542     189                                                        2244    2.51   -0.60  1.0000
   0 -14 -13    2755     150                                                        2447    2.51    0.60  1.0000
   0  14 -13    2336     166                                                        2028    1.98   -1.40  1.0000
   0 -14  13    2677     145                                                        2347    1.98    1.40  1.0000
   0 -14  14    1645     201                                                        1383   -4.00   -0.21  1.0000
   0  14 -14    1255     167                                                        1024   -4.00    0.21  1.0000
   0  14  14    1500     152                                                        1250   -3.95    0.22  1.0000
   0 -14 -14    1335     164                                                        1100   -3.95   -0.22  1.0000
   0  14  14    1092     150                                                         878   -3.95    0.22  1.0000
   0 -14 -14    1557     163                                                        1304   -3.95   -0.22  1.0000
   0 -14  14    1385     136                                                        1144   -4.00   -0.21  1.0000
   0 -14  15    7198     241                                                        6223    8.08    1.30  1.0000
   0  14 -15    6821     205                                                        5876    8.08   -1.30  1.0000
   0  14  15    6976     176                                                        6098    7.36   -1.21  1.0000
   0 -14 -15    6382     178                                                        5535    7.36    1.21  1.0000
   0  14  15    6745     219                                                        5881    7.36   -1.21  1.0000
   0 -14 -15    6880     189                                                        6002    7.36    1.21  1.0000
   0  14 -15    7484     234                                                        6497    8.08   -1.30  1.0000
   0 -14  15    6950     176                                                        5991    8.08    1.30  1.0000
   0 -14  16    1826     205                                                        1854   -0.73    0.42  1.0000
   0  14 -16    1474     176                                                        1499   -0.73   -0.42  1.0000
   0  14  16    1640     164                                                        1694   -1.02   -0.74  1.0000
   0  14  16    1636     185                                                        1689   -1.02   -0.74  1.0000
   0 -14 -16    1669     173                                                        1723   -1.02    0.74  1.0000
   0  14 -16    1257     344                                                        1280   -0.73   -0.42  1.0000
   0 -14  16    1825     150                                                        1853   -0.73    0.42  1.0000
   0 -14  17    4431     246                                                        4499   -0.48   -0.38  1.0000
   0  14 -17    4083     197                                                        4149   -0.48    0.38  1.0000
   0  14  17    4660     190                                                        4773   -0.80    0.73  1.0000
   0  14  17    4229     207                                                        4336   -0.80    0.73  1.0000
   0 -14 -17    4673     198                                                        4786   -0.80   -0.73  1.0000
   0  14 -17    4908     233                                                        4980   -0.48    0.38  1.0000
   0 -14  17    4259     163                                                        4326   -0.48   -0.38  1.0000
   0 -14  18     660     211                                                         602   -1.12    0.00  1.0000
   0  14 -18     583     163                                                         529   -1.12    0.00  1.0000
   0  14  18     506     153                                                         487   -0.51    0.10  1.0000
   0  14  18     520     174                                                         501   -0.51    0.10  1.0000
   0 -14 -18     670     157                                                         648   -0.51   -0.10  1.0000
   0 -14  18     589     138                                                         535   -1.12    0.00  1.0000
   0 -14  19     582     222                                                         522    4.02    1.21  1.0000
   0  14 -19     735     135                                                         671    4.02   -1.21  1.0000
   0  14  19     883     170                                                         836    3.30   -0.81  1.0000
   0  14  19     580     148                                                         538    3.30   -0.81  1.0000
   0 -14 -19     744     162                                                         700    3.30    0.81  1.0000
   0  14 -19     534     161                                                         475    4.02   -1.21  1.0000
   0 -14  20     632     217                                                        1021    0.35   -7.49  1.0000
   0  14 -20     683     167                                                        1100    0.35    7.49  1.0000
   0  14  20     644     180                                                        1018    0.32    7.01  1.0000
   0  14  20     647     172                                                        1021    0.32    7.01  1.0000
   0  14 -20     626     192                                                        1025    0.35    7.49  1.0000
   0  14  21    1401     189                                                        1594   -0.06   -1.82  1.0000
   0  14  21    1204     171                                                        1384   -0.06   -1.82  1.0000
   0 -14  22    5656     270                                                        5902    1.11    0.41  1.0000
   0  14  22    5415     189                                                        5660    1.43    0.22  1.0000
   0  14  22    4883     203                                                        5116    1.43    0.22  1.0000
   0  14 -22    5822     252                                                        6072    1.11   -0.41  1.0000
   0  14  23      11     174                                                        -175   -0.58   -2.30  1.0000
   0  14  23      11     155                                                         -55   -0.58   -2.30  1.0000
   0 -14  24    2234     230                                                        2124    0.17   -1.59  1.0000
   0  14  24    2259     158                                                        2161   -0.41    0.71  1.0000
   0  14  24    2157     166                                                        2062   -0.41    0.71  1.0000
   0 -14  25     454     214                                                         468    0.37    1.37  1.0000
   0  14  25     576     173                                                         614    0.71   -0.95  1.0000
   0  14  25     336     154                                                         365    0.71   -0.95  1.0000
   0 -14  26     922     224                                                         776   -1.39   -1.20  1.0000
   0  14  26    1003     182                                                         840   -0.90    1.91  1.0000
   0  14  26     966     147                                                         806   -0.90    1.91  1.0000
   0 -14  27     171     190                                                         158   -0.17    1.76  1.0000
   0  14  27       5     152                                                        -172   -0.38   -1.57  1.0000
   0  14  27       5     137                                                         -25   -0.38   -1.57  1.0000
   0 -14  28     592     225                                                         498   -1.20   -0.84  1.0000
   0  14  28    1048     189                                                         860   -1.45    2.14  1.0000
   0  14  28     748     138                                                         590   -1.45    2.14  1.0000
   0  14  29     384     189                                                         521   -1.71    2.28  1.0000
   0  14  29     192     133                                                         290   -1.71    2.28  1.0000
   0  14 -29     362     181                                                         474   -1.55    1.75  1.0000
   0 -14  30     167     225                                                          79   -3.21    0.18  1.0000
   0  14  30     161     188                                                          69   -3.24    0.38  1.0000
   0  14  30      44     146                                                           5   -3.24    0.38  1.0000
   0  14 -30     409     203                                                         261   -3.21   -0.18  1.0000
   0  14  31     200     165                                                         215   -0.39   -0.16  1.0000
   0  14  31     276     137                                                         294   -0.39   -0.16  1.0000
   0  14  32     299     174                                                         213   -1.20    1.57  1.0000
   0  14  33      37     173                                                          44   -0.61   -0.75  1.0000
   0  14  34     107     182                                                         126    1.58    1.24  1.0000
   0  14  35     206     212                                                         461   -5.23   -0.40  1.0000
   0  14  36     168     222                                                         226   -0.83   -1.30  1.0000
   0  16   0     539     176                                                         832    5.65    2.45  1.0000
   0  16   0     434     152                                                         696    5.65    2.45  1.0000
   0  16   1    1822     160                                                        1116    4.37   -6.36  1.0000
   0  16  -1    1720     170                                                        1048    3.00   -6.30  1.0000
   0  16   1    1954     161                                                        1221    4.37   -6.36  1.0000
   0  16  -1    1903     152                                                        1192    3.00   -6.30  1.0000
   0 -16  -1    1828     128                                                        1121    4.37    6.36  1.0000
   0  16   2    7247     246                                                        8079    3.17    1.47  1.0000
   0  16  -2    7469     251                                                        8314    3.32    1.23  1.0000
   0  16   2    6801     224                                                        7608    3.17    1.47  1.0000
   0  16  -2    6431     220                                                        7216    3.32    1.23  1.0000
   0  16  -2    6646     303                                                        7444    3.32    1.23  1.0000
   0 -16  -2    6868     207                                                        7680    3.17   -1.47  1.0000
   0  16   3   14402     449                                                       16099   -2.73    4.72  1.0000
   0  16  -3   14738     467                                                       16421   -1.78    4.74  1.0000
   0  16   3   14515     427                                                       16219   -2.73    4.72  1.0000
   0  16  -3   14646     447                                                       16324   -1.78    4.74  1.0000
   0  16   3   13468     409                                                       15110   -2.73    4.72  1.0000
   0  16  -3   14765     466                                                       16450   -1.78    4.74  1.0000
   0 -16  -3   14383     414                                                       16081   -2.73   -4.72  1.0000
   0  16   4    3860     202                                                        3652   -2.66   -3.82  1.0000
   0  16  -4    3936     202                                                        3736   -2.42   -3.40  1.0000
   0  16   4    3880     170                                                        3672   -2.66   -3.82  1.0000
   0  16  -4    3747     192                                                        3552   -2.42   -3.40  1.0000
   0  16   4    3645     202                                                        3442   -2.66   -3.82  1.0000
   0  16  -4    3841     241                                                        3644   -2.42   -3.40  1.0000
   0 -16  -4    3576     154                                                        3351   -2.66    3.82  1.0000
   0 -16   4    3637     169                                                        3422   -2.42    3.40  1.0000
   0  16   5    1755     172                                                        1853    7.30   -4.62  1.0000
   0 -16   5    1769     193                                                        2018    7.90    3.86  1.0000
   0  16  -5    1571     179                                                        1766    7.90   -3.86  1.0000
   0  16   5    1728     153                                                        1824    7.30   -4.62  1.0000
   0  16   5    1940     195                                                        2050    7.30   -4.62  1.0000
   0 -16  -5    1673     159                                                        1797    7.30    4.62  1.0000
   0 -16   5    1834     156                                                        2090    7.90    3.86  1.0000
   0 -16   6   14924     335                                                       13210    2.28   -5.95  1.0000
   0  16  -6   14044     315                                                       12387    2.28    5.95  1.0000
   0  16   6   14655     295                                                       12873    3.18    5.11  1.0000
   0  16   6   14341     317                                                       12579    3.18    5.11  1.0000
   0  16  -6   14763     406                                                       13064    2.28    5.95  1.0000
   0 -16  -6   15036     298                                                       13227    3.18   -5.11  1.0000
   0 -16   6   14130     268                                                       12463    2.28   -5.95  1.0000
   0 -16   7    3513     205                                                        3729   -3.47    6.34  1.0000
   0  16  -7    3143     195                                                        3342   -3.47   -6.34  1.0000
   0  16   7    3335     161                                                        3601   -3.49   -6.89  1.0000
   0 -16  -7    3428     170                                                        3699   -3.49    6.89  1.0000
   0  16   7    3247     201                                                        3508   -3.49   -6.89  1.0000
   0  16  -7    3475     326                                                        3689   -3.47   -6.34  1.0000
   0 -16  -7    3415     179                                                        3686   -3.49    6.89  1.0000
   0 -16   7    3435     152                                                        3647   -3.47    6.34  1.0000
   0 -16   8    6304     247                                                        6814   -1.59    4.02  1.0000
   0  16  -8    5897     223                                                        6386   -1.59   -4.02  1.0000
   0  16   8    6030     201                                                        6691   -2.44   -3.65  1.0000
   0 -16  -8    5958     218                                                        6618   -2.44    3.65  1.0000
   0  16   8    6170     248                                                        6839   -2.44   -3.65  1.0000
   0  16  -8    6387     311                                                        6897   -1.59   -4.02  1.0000
   0 -16  -8    5920     187                                                        6578   -2.44    3.65  1.0000
   0 -16   8    5855     172                                                        6346   -1.59    4.02  1.0000
   0 -16   9    3385     217                                                        3419   -1.05    0.64  1.0000
   0  16  -9    3142     193                                                        3174   -1.05   -0.64  1.0000
   0  16   9    3697     179                                                        3695   -1.77   -0.66  1.0000
   0 -16  -9    3471     193                                                        3471   -1.77    0.66  1.0000
   0  16   9    3419     202                                                        3417   -1.77   -0.66  1.0000
   0  16  -9    3604     277                                                        3638   -1.05   -0.64  1.0000
   0 -16  -9    3270     160                                                        3269   -1.77    0.66  1.0000
   0 -16   9    3471     161                                                        3506   -1.05    0.64  1.0000
   0 -16  10    2539     186                                                        2643    2.42    3.94  1.0000
   0  16 -10    2355     186                                                        2450    2.42   -3.94  1.0000
   0  16  10    2560     157                                                        2547    3.17   -3.54  1.0000
   0 -16 -10    2370     173                                                        2360    3.17    3.54  1.0000
   0  16  10    2698     195                                                        2685    3.17   -3.54  1.0000
   0 -16 -10    2553     148                                                        2544    3.17    3.54  1.0000
   0  16 -10    2519     206                                                        2618    2.42   -3.94  1.0000
   0 -16  11     267     164                                                         304   -4.51    2.71  1.0000
   0  16 -11     138     164                                                         147   -4.51   -2.71  1.0000
   0  16  11     316     147                                                         335   -3.74   -2.54  1.0000
   0 -16 -11     157     128                                                         160   -3.74    2.54  1.0000
   0  16  11     330     178                                                         351   -3.74   -2.54  1.0000
   0 -16 -11     312     125                                                         333   -3.74    2.54  1.0000
   0  16 -11     222     181                                                         250   -4.51   -2.71  1.0000
   0 -16  12     124     178                                                         229    1.41    2.59  1.0000
   0  16 -12     165     166                                                         285    1.41   -2.59  1.0000
   0  16  12     238     142                                                         346    0.93   -2.11  1.0000
   0 -16 -12     122     160                                                         202    0.93    2.11  1.0000
   0  16  12     132     152                                                         215    0.93   -2.11  1.0000
   0 -16  13    2052     211                                                        2174   -0.35   -1.01  1.0000
   0  16 -13    1874     186                                                        1990   -0.35    1.01  1.0000
   0  16  13    1849     144                                                        2022   -0.71    1.51  1.0000
   0 -16 -13    1942     273                                                        2119   -0.71   -1.51  1.0000
   0  16  13    2017     203                                                        2197   -0.71    1.51  1.0000
   0  16 -13    1742     423                                                        1854   -0.35    1.01  1.0000
   0 -16  14    5720     264                                                        6570   -4.17    1.72  1.0000
   0  16 -14    4794     216                                                        5575   -4.17   -1.72  1.0000
   0  16  14    5224     198                                                        5994   -3.58   -1.93  1.0000
   0  16  14    5119     234                                                        5881   -3.58   -1.93  1.0000
   0  16 -14    5191     222                                                        6003   -4.17   -1.72  1.0000
   0 -16  15    1170     208                                                         974   -2.89    0.18  1.0000
   0  16 -15     926     184                                                         750   -2.89   -0.18  1.0000
   0  16  15     945     158                                                         869   -1.70   -0.77  1.0000
   0  16  15     916     186                                                         841   -1.70   -0.77  1.0000
   0 -16  16    1507     236                                                        1478    0.85    0.08  1.0000
   0  16 -16    1514     187                                                        1485    0.85   -0.08  1.0000
   0  16  16    1584     174                                                        1484    1.20    0.49  1.0000
   0  16  16    1576     199                                                        1476    1.20    0.49  1.0000
   0  16 -16    1630     210                                                        1600    0.85   -0.08  1.0000
   0 -16  17    1099     206                                                         633   -6.56    3.89  1.0000
   0  16 -17    1241     176                                                         731   -6.56   -3.89  1.0000
   0  16  17    1499     169                                                         953   -6.32   -3.80  1.0000
   0  16  17    1213     189                                                         724   -6.32   -3.80  1.0000
   0  16 -17    1112     209                                                         631   -6.56   -3.89  1.0000
   0 -16  18     901     206                                                         908    2.00    0.86  1.0000
   0  16 -18    1188     192                                                        1197    2.00   -0.86  1.0000
   0  16  18    1339     171                                                        1271    2.73   -0.27  1.0000
   0  16  18    1062     181                                                        1000    2.73   -0.27  1.0000
   0  16 -18    1481     208                                                        1492    2.00   -0.86  1.0000
   0 -16  19     977     225                                                        1248    3.98   -1.45  1.0000
   0  16 -19    1080     177                                                        1367    3.98    1.45  1.0000
   0  16  19    1203     183                                                        1547    3.58    2.11  1.0000
   0  16  19     820     195                                                        1106    3.58    2.11  1.0000
   0 -16  20    2424     280                                                        2256   -5.93   -1.22  1.0000
   0  16  20    2678     191                                                        2508   -5.32    1.15  1.0000
   0  16  20    2124     158                                                        1967   -5.32    1.15  1.0000
   0  16 -20    2301     258                                                        2136   -5.93    1.22  1.0000
   0 -16  21    3809     249                                                        3573   -2.62    1.43  1.0000
   0  16  21    3262     172                                                        3057   -1.61   -1.31  1.0000
   0  16  21    3508     199                                                        3296   -1.61   -1.31  1.0000
   0  16 -21    3262     221                                                        3043   -2.62   -1.43  1.0000
   0 -16  22     255     211                                                         273   -2.40    2.47  1.0000
   0  16  22     478     167                                                         525   -2.06   -2.53  1.0000
   0  16  22      87     140                                                          96   -2.06   -2.53  1.0000
   0 -16  23    3021     238                                                        2893    1.86    0.28  1.0000
   0  16  23    2983     185                                                        2969    1.54    0.43  1.0000
   0  16  23    2695     189                                                        2682    1.54    0.43  1.0000
   0 -16  24       6     221                                                         -65    1.66   -0.48  1.0000
   0  16  24     305     152                                                         216    2.02    0.77  1.0000
   0  16  24     311     133                                                         221    2.02    0.77  1.0000
   0 -16  25     858     220                                                         898    0.23   -0.60  1.0000
   0  16  25     949     180                                                        1002    0.57    0.83  1.0000
   0  16  25     878     166                                                         929    0.57    0.83  1.0000
   0 -16  26      25     211                                                          68   -2.25    1.12  1.0000
   0  16  26      12     173                                                         -63   -2.35   -0.94  1.0000
   0  16  26     175     151                                                         271   -2.35   -0.94  1.0000
   0 -16  27     168     225                                                         263    2.69    0.60  1.0000
   0  16  27     244     154                                                         352    2.47   -0.25  1.0000
   0  16  27     174     147                                                         266    2.47   -0.25  1.0000
   0 -16  28     328     230                                                         375   -1.98    2.06  1.0000
   0  16  28     381     186                                                         403   -2.28   -1.65  1.0000
   0  16  28     226     143                                                         239   -2.28   -1.65  1.0000
   0 -16  29     237     226                                                         298    2.28   -0.40  1.0000
   0  16  29     112     191                                                         160    2.67    0.25  1.0000
   0  16  29      51     145                                                          81    2.67    0.25  1.0000
   0 -16  30      74     187                                                          70   -0.93    0.02  1.0000
   0  16  30      73     187                                                          67   -1.32   -0.04  1.0000
   0  16  30     257     157                                                         248   -1.32   -0.04  1.0000
   0  16 -30     111     191                                                         106   -0.93   -0.02  1.0000
   0  16  31     101     170                                                          59    0.41   -1.72  1.0000
   0 -16  32     101     196                                                         120    1.23   -1.55  1.0000
   0  16  32      10     168                                                        -189    1.22    1.97  1.0000
   0  16  33      33     205                                                         -83   -1.30    3.98  1.0000
   0  16  34     223     212                                                         200    1.20    0.18  1.0000
   0 -16  35     147     233                                                         159    2.18    0.27  1.0000
   0  16  35     188     215                                                         204    2.22   -0.31  1.0000
   0  18   0    7070     234                                                        6241   -1.20   -8.69  1.0000
   0  18   0    7047     214                                                        6219   -1.20   -8.69  1.0000
   0  18   1    7438     231                                                        6224    4.68    3.45  1.0000
   0  18  -1    7219     232                                                        6108    4.41    2.84  1.0000
   0  18   1    7666     215                                                        6433    4.68    3.45  1.0000
   0  18  -1    7036     211                                                        5940    4.41    2.84  1.0000
   0  18   2     631     176                                                         787   -2.28   -0.06  1.0000
   0  18  -2     758     169                                                         871   -1.77   -0.77  1.0000
   0  18   2     702     168                                                         866   -2.28   -0.06  1.0000
   0  18  -2     701     159                                                         810   -1.77   -0.77  1.0000
   0  18  -2     844     185                                                         963   -1.77   -0.77  1.0000
   0  18   3     941     179                                                        1397    1.75   -7.72  1.0000
   0  18  -3     899     183                                                        1330    1.92   -7.15  1.0000
   0  18   3     761     159                                                        1168    1.75   -7.72  1.0000
   0  18  -3    1001     189                                                        1457    1.92   -7.15  1.0000
   0  18   3     896     164                                                        1341    1.75   -7.72  1.0000
   0  18  -3     847     244                                                        1265    1.92   -7.15  1.0000
   0  18   4    3009     188                                                        2220    3.69   -4.41  1.0000
   0  18  -4    2979     186                                                        2143    3.77   -4.96  1.0000
   0  18   4    3174     177                                                        2362    3.69   -4.41  1.0000
   0  18  -4    3421     198                                                        2521    3.77   -4.96  1.0000
   0  18   4    3292     219                                                        2464    3.69   -4.41  1.0000
   0  18  -4    3451     339                                                        2547    3.77   -4.96  1.0000
   0  18   5    3995     206                                                        3983    0.41    2.02  1.0000
   0  18  -5    4019     231                                                        3997    0.08    0.84  1.0000
   0  18   5    4173     192                                                        4161    0.41    2.02  1.0000
   0  18  -5    3954     211                                                        3932    0.08    0.84  1.0000
   0  18   5    4008     199                                                        3996    0.41    2.02  1.0000
   0  18  -5    3904     382                                                        3882    0.08    0.84  1.0000
   0 -18   6    7433     266                                                        7027    2.78    0.40  1.0000
   0  18   6    6950     234                                                        6508    3.20   -0.39  1.0000
   0  18  -6    7274     260                                                        6866    2.78   -0.40  1.0000
   0  18   6    8021     239                                                        7546    3.20   -0.39  1.0000
   0  18   6    7397     263                                                        6941    3.20   -0.39  1.0000
   0  18  -6    7845     276                                                        7422    2.78   -0.40  1.0000
   0  18   7    1191     186                                                        1426    2.30   -2.17  1.0000
   0 -18   7     975     184                                                        1273    3.14    2.15  1.0000
   0  18  -7    1052     180                                                        1357    3.14   -2.15  1.0000
   0  18   7    1071     160                                                        1294    2.30   -2.17  1.0000
   0  18   7     947     172                                                        1157    2.30   -2.17  1.0000
   0  18  -7    1280     210                                                        1615    3.14   -2.15  1.0000
   0 -18   8     691     177                                                        1081    0.87    5.42  1.0000
   0  18  -8     734     197                                                        1135    0.87   -5.42  1.0000
   0  18   8     715     162                                                        1146   -0.80   -5.26  1.0000
   0  18   8     668     204                                                        1086   -0.80   -5.26  1.0000
   0  18  -8     753     215                                                        1159    0.87   -5.42  1.0000
   0 -18   9    1227     175                                                        1163   -0.32    1.50  1.0000
   0  18  -9    1240     183                                                        1174   -0.32   -1.50  1.0000
   0  18   9    1339     161                                                        1257   -0.33   -2.07  1.0000
   0 -18  -9    1209     164                                                        1133   -0.33    2.07  1.0000
   0  18   9    1314     170                                                        1233   -0.33   -2.07  1.0000
   0  18  -9    1314     212                                                        1246   -0.32   -1.50  1.0000
   0 -18  10    1157     203                                                        1372   -1.14    2.12  1.0000
   0  18 -10    1096     198                                                        1305   -1.14   -2.12  1.0000
   0  18  10    1000     159                                                        1174   -1.37   -1.82  1.0000
   0 -18 -10    1029     174                                                        1206   -1.37    1.82  1.0000
   0  18  10    1238     204                                                        1431   -1.37   -1.82  1.0000
   0 -18  11    6088     251                                                        6291    0.15    2.89  1.0000
   0  18 -11    5910     239                                                        6100    0.15   -2.89  1.0000
   0  18  11    6135     204                                                        6196   -0.23   -2.02  1.0000
   0 -18 -11    5813     219                                                        5880   -0.23    2.02  1.0000
   0  18  11    6425     242                                                        6488   -0.23   -2.02  1.0000
   0  18 -11    5899     219                                                        6089    0.15   -2.89  1.0000
   0 -18  12    1085     192                                                         972   -0.19   -1.71  1.0000
   0  18 -12    1025     188                                                         916   -0.19    1.71  1.0000
   0  18  12    1035     162                                                         954   -0.40    1.43  1.0000
   0  18  12    1043     203                                                         962   -0.40    1.43  1.0000
   0 -18  13   13558     316                                                       13245   -0.98    3.11  1.0000
   0  18 -13   11906     348                                                       11595   -0.98   -3.11  1.0000
   0  18  13   13685     246                                                       13317   -1.09   -2.83  1.0000
   0  18  13   13360     293                                                       12996   -1.09   -2.83  1.0000
   0  18 -13   12783     371                                                       12462   -0.98   -3.11  1.0000
   0 -18  14     899     215                                                        1065   -2.27    2.86  1.0000
   0  18 -14     713     191                                                         868   -2.27   -2.86  1.0000
   0  18  14     694     194                                                         882   -2.66   -1.83  1.0000
   0  18  14     625     209                                                         804   -2.66   -1.83  1.0000
   0 -18  15    5158     296                                                        5601    3.20    1.64  1.0000
   0  18 -15    4527     221                                                        4933    3.20   -1.64  1.0000
   0  18  15    4609     178                                                        5145    3.78   -1.35  1.0000
   0  18  15    4637     241                                                        5174    3.78   -1.35  1.0000
   0  18 -15    4914     344                                                        5338    3.20   -1.64  1.0000
   0 -18  16    4928     283                                                        4417    0.80    3.15  1.0000
   0  18 -16    4590     212                                                        4102    0.80   -3.15  1.0000
   0  18  16    4891     195                                                        4520    0.36   -2.54  1.0000
   0  18  16    4449     228                                                        4096    0.36   -2.54  1.0000
   0  18 -16    4690     342                                                        4197    0.80   -3.15  1.0000
   0 -18  17    4349     313                                                        4131    1.45   -0.20  1.0000
   0  18 -17    4130     204                                                        3917    1.45    0.20  1.0000
   0  18  17    4257     195                                                        4024    1.33   -0.26  1.0000
   0  18  17    4323     221                                                        4089    1.33   -0.26  1.0000
   0  18 -17    4377     286                                                        4158    1.45    0.20  1.0000
   0 -18  18    3485     230                                                        3196    2.69   -1.30  1.0000
   0  18 -18    3132     185                                                        2859    2.69    1.30  1.0000
   0  18  18    3740     190                                                        3347    3.37    1.80  1.0000
   0  18  18    3344     210                                                        2972    3.37    1.80  1.0000
   0  18 -18    3578     228                                                        3286    2.69    1.30  1.0000
   0 -18  19     619     254                                                         394    4.14   -0.29  1.0000
   0  18  19     845     185                                                         597    4.00    0.65  1.0000
   0  18  19     576     181                                                         373    4.00    0.65  1.0000
   0 -18  20    3800     245                                                        4098   -2.22    1.02  1.0000
   0  18  20    3855     178                                                        4170   -3.36   -0.65  1.0000
   0  18  20    3232     199                                                        3520   -3.36   -0.65  1.0000
   0  18 -20    3504     227                                                        3790   -2.22   -1.02  1.0000
   0 -18  21      37     208                                                          73    3.53   -2.30  1.0000
   0  18  21      82     151                                                         143    3.45    2.19  1.0000
   0 -18  22    1003     213                                                         869    1.67    0.13  1.0000
   0  18  22    1717     180                                                        1467    2.50   -0.48  1.0000
   0  18  22    1182     179                                                         976    2.50   -0.48  1.0000
   0  18 -22    1334     206                                                        1180    1.67   -0.13  1.0000
   0 -18  23       5     206                                                        -145   -1.01    1.26  1.0000
   0  18  23       3     145                                                         -30   -0.89   -0.87  1.0000
   0  18  23       3     173                                                          -6   -0.89   -0.87  1.0000
   0 -18  24    1118     216                                                        1187   -1.87    0.78  1.0000
   0  18  24    1030     188                                                        1047   -0.96   -0.67  1.0000
   0  18  24     915     172                                                         931   -0.96   -0.67  1.0000
   0 -18  25      30     209                                                         -20    3.60   -1.71  1.0000
   0  18  25     267     150                                                         153    2.97    0.94  1.0000
   0  18  25      87     134                                                          28    2.97    0.94  1.0000
   0 -18  26     107     222                                                          49    1.73    1.74  1.0000
   0  18  26      61     174                                                          21    1.41   -1.89  1.0000
   0  18  26     271     154                                                         175    1.41   -1.89  1.0000
   0 -18  27     378     215                                                         354    0.16    0.98  1.0000
   0  18  27     231     182                                                         205    0.49   -0.55  1.0000
   0  18  27     459     156                                                         423    0.49   -0.55  1.0000
   0 -18  28       3     217                                                         -42    1.24    0.48  1.0000
   0  18  28       6     162                                                        -113    1.71   -0.38  1.0000
   0  18  28      60     148                                                          30    1.71   -0.38  1.0000
   0 -18  29     179     218                                                         149    0.06   -0.91  1.0000
   0  18  29      43     186                                                          39   -0.82    0.94  1.0000
   0  18  29       3     146                                                        -217   -0.82    0.94  1.0000
   0 -18  30     175     215                                                         215    1.38   -0.73  1.0000
   0  18  30      83     194                                                         104    1.46    0.44  1.0000
   0  18  30       4     149                                                        -300    1.46    0.44  1.0000
   0  18 -30       4     191                                                           8    1.38    0.73  1.0000
   0 -18  31       2     224                                                        -135   -0.62   -0.94  1.0000
   0  18  31       1     194                                                         -90    0.24    0.56  1.0000
   0  18  32      30     201                                                          33   -1.55    0.07  1.0000
   0 -18  33      96     229                                                         107    0.10    0.39  1.0000
   0  18  33      46     182                                                          44    0.19    0.15  1.0000
   0  18  34     515     186                                                         724    0.79    3.37  1.0000
   0  20   0    3404     209                                                        3149    8.12   -3.53  1.0000
   0  20   0    3517     197                                                        3261    8.12   -3.53  1.0000
   0  20   1    6626     242                                                        6799    2.37   -1.77  1.0000
   0  20  -1    6405     243                                                        6482    3.62   -1.75  1.0000
   0  20   1    6645     220                                                        6818    2.37   -1.77  1.0000
   0  20  -1    6504     220                                                        6582    3.62   -1.75  1.0000
   0  20   2     468     177                                                         716    4.50    2.19  1.0000
   0  20  -2     362     186                                                         617    3.72    3.16  1.0000
   0  20   2     414     174                                                         647    4.50    2.19  1.0000
   0  20  -2     477     174                                                         767    3.72    3.16  1.0000
   0  20   3   11291     381                                                       12535    8.17   -4.22  1.0000
   0  20  -3   11254     388                                                       12615    8.47   -4.59  1.0000
   0  20   3   11403     360                                                       12654    8.17   -4.22  1.0000
   0  20  -3   11101     375                                                       12452    8.47   -4.59  1.0000
   0  20   3   11979     301                                                       13263    8.17   -4.22  1.0000
   0  20  -3   11281     373                                                       12644    8.47   -4.59  1.0000
   0  20   4      55     172                                                         224    6.07   -0.62  1.0000
   0  20  -4      76     182                                                         297    7.14   -1.77  1.0000
   0  20   4     129     164                                                         363    6.07   -0.62  1.0000
   0  20  -4      93     177                                                         331    7.14   -1.77  1.0000
   0  20  -4      42     200                                                         212    7.14   -1.77  1.0000
   0  20   5      96     176                                                          64    0.44    1.75  1.0000
   0  20  -5     178     180                                                         135    0.29    1.66  1.0000
   0  20   5     269     152                                                         216    0.44    1.75  1.0000
   0  20  -5     193     177                                                         148    0.29    1.66  1.0000
   0  20   5     511     194                                                         438    0.44    1.75  1.0000
   0  20  -5     313     216                                                         255    0.29    1.66  1.0000
   0  20   6    1356     191                                                        1235    2.04   -0.88  1.0000
   0  20  -6    1252     192                                                        1209    2.21   -0.07  1.0000
   0  20   6    1423     175                                                        1299    2.04   -0.88  1.0000
   0  20  -6    1491     180                                                        1445    2.21   -0.07  1.0000
   0  20   6    1576     202                                                        1445    2.04   -0.88  1.0000
   0  20  -6    1430     284                                                        1385    2.21   -0.07  1.0000
   0  20   7    2834     201                                                        3448    4.81    0.72  1.0000
   0  20  -7    2836     207                                                        3524    5.26    0.91  1.0000
   0  20   7    3067     189                                                        3705    4.81    0.72  1.0000
   0  20   7    2892     194                                                        3512    4.81    0.72  1.0000
   0  20  -7    3148     244                                                        3872    5.26    0.91  1.0000
   0 -20   8    1361     200                                                        1296    2.56   -0.50  1.0000
   0  20   8    1080     177                                                        1082    0.79    0.46  1.0000
   0  20  -8    1359     196                                                        1294    2.56    0.50  1.0000
   0  20   8    1471     174                                                        1474    0.79    0.46  1.0000
   0  20   8    1258     291                                                        1260    0.79    0.46  1.0000
   0  20  -8    1640     227                                                        1569    2.56    0.50  1.0000
   0  20   9    2039     199                                                        2276   -2.18    2.16  1.0000
   0 -20   9    2249     213                                                        2386   -1.60   -1.28  1.0000
   0  20  -9    1830     188                                                        1954   -1.60    1.28  1.0000
   0  20   9    2204     184                                                        2450   -2.18    2.16  1.0000
   0  20   9    2262     221                                                        2512   -2.18    2.16  1.0000
   0  20  -9    2169     257                                                        2305   -1.60    1.28  1.0000
   0 -20  10    3507     226                                                        3324    2.27   -0.41  1.0000
   0  20 -10    3638     220                                                        3450    2.27    0.41  1.0000
   0  20  10    3744     186                                                        3536    3.21    1.01  1.0000
   0  20  10    3414     202                                                        3215    3.21    1.01  1.0000
   0  20 -10    3646     231                                                        3458    2.27    0.41  1.0000
   0 -20  11     751     177                                                         592    1.21   -1.91  1.0000
   0  20 -11     912     182                                                         735    1.21    1.91  1.0000
   0  20  11     974     161                                                         853    0.79    1.24  1.0000
   0  20  11     674     193                                                         574    0.79    1.24  1.0000
   0  20 -11     965     207                                                         783    1.21    1.91  1.0000
   0 -20  12     707     188                                                         792    1.38   -0.01  1.0000
   0  20 -12     575     195                                                         653    1.38    0.01  1.0000
   0  20  12     731     151                                                         739    0.45   -0.49  1.0000
   0  20  12     625     164                                                         632    0.45   -0.49  1.0000
   0  20 -12     697     196                                                         783    1.38    0.01  1.0000
   0 -20  13      18     185                                                         -20   -0.77   -2.99  1.0000
   0  20 -13     446     172                                                         305   -0.77    2.99  1.0000
   0  20  13     214     158                                                          85   -0.57    4.27  1.0000
   0  20  13      35     191                                                         -26   -0.57    4.27  1.0000
   0  20 -13      18     170                                                        -102   -0.77    2.99  1.0000
   0 -20  14     383     188                                                         450    3.42    1.39  1.0000
   0  20  14     375     159                                                         481    3.44   -0.55  1.0000
   0  20  14     327     172                                                         425    3.44   -0.55  1.0000
   0 -20  15    2887     211                                                        3077    2.12    0.51  1.0000
   0  20  15    2813     179                                                        2995    2.05   -0.48  1.0000
   0  20  15    2893     210                                                        3077    2.05   -0.48  1.0000
   0  20 -15    3092     225                                                        3288    2.12   -0.51  1.0000
   0 -20  16      20     201                                                         -89    0.62   -3.17  1.0000
   0  20  16      57     135                                                          42    0.66    2.58  1.0000
   0  20  16     152     193                                                         135    0.66    2.58  1.0000
   0  20 -16      20     209                                                        -197    0.62    3.17  1.0000
   0 -20  17    2184     217                                                        2206    0.05    0.75  1.0000
   0  20  17    2204     157                                                        2195   -0.04    0.24  1.0000
   0  20  17    2049     207                                                        2040   -0.04    0.24  1.0000
   0  20 -17    2328     223                                                        2350    0.05   -0.75  1.0000
   0 -20  18      12     207                                                        -323   -1.56    1.94  1.0000
   0  20  18      13     134                                                        -134   -2.33   -1.26  1.0000
   0  20  18      13     160                                                        -110   -2.33   -1.26  1.0000
   0 -20  19     953     227                                                        1050    2.47    0.54  1.0000
   0  20  19     707     168                                                         824    2.59   -0.96  1.0000
   0  20  19     659     162                                                         772    2.59   -0.96  1.0000
   0  20 -19     664     209                                                         744    2.47   -0.54  1.0000
   0 -20  20      12     199                                                         -35    2.00    1.45  1.0000
   0  20  20     209     170                                                         191    2.22   -1.20  1.0000
   0  20  20      12     154                                                         -44    2.22   -1.20  1.0000
   0  20 -20      12     210                                                         -72    2.00   -1.45  1.0000
   0 -20  21    1460     210                                                        1102    0.81   -3.56  1.0000
   0  20  21    1386     153                                                        1051    1.55    3.25  1.0000
   0  20  21    1403     186                                                        1066    1.55    3.25  1.0000
   0 -20  22      20     203                                                          15    0.21   -3.03  1.0000
   0  20  22     107     171                                                         147    1.02    2.61  1.0000
   0  20  22      13     173                                                          16    1.02    2.61  1.0000
   0 -20  23     439     208                                                         568   -1.26    1.69  1.0000
   0  20  23     433     174                                                         539   -1.47   -1.14  1.0000
   0  20  23     505     175                                                         619   -1.47   -1.14  1.0000
   0  20 -23     627     206                                                         780   -1.26   -1.69  1.0000
   0 -20  24     400     213                                                         587   -1.88    4.43  1.0000
   0  20  24     588     179                                                         761   -1.54   -3.61  1.0000
   0  20  24     511     167                                                         672   -1.54   -3.61  1.0000
   0 -20  25      17     208                                                        -103   -1.05   -2.78  1.0000
   0  20  25      14     169                                                        -162   -0.68    2.63  1.0000
   0  20  25      14     163                                                        -145   -0.68    2.63  1.0000
   0 -20  26      74     206                                                          38    1.26   -1.62  1.0000
   0  20  26       5     175                                                        -145    0.85    1.35  1.0000
   0  20  26     211     139                                                         157    0.85    1.35  1.0000
   0 -20  27       1     212                                                         -53   -0.62   -0.10  1.0000
   0  20  27      24     151                                                          19   -0.62    0.17  1.0000
   0  20  27       1     158                                                         -63   -0.62    0.17  1.0000
   0  20 -27       1     204                                                         -41   -0.62    0.10  1.0000
   0 -20  28      84     225                                                         260   -0.18    5.33  1.0000
   0  20  28      46     161                                                        -162   -0.37   -4.95  1.0000
   0  20  28       7     155                                                          66   -0.37   -4.95  1.0000
   0 -20  29       1     220                                                         -45   -0.44   -0.57  1.0000
   0  20  29     287     194                                                         259   -0.34    0.83  1.0000
   0  20  29       2     155                                                         -55   -0.34    0.83  1.0000
   0  20  30     615     198                                                         763   -3.55    0.10  1.0000
   0  20  31     568     202                                                         773   -3.13   -1.19  1.0000
   0  20  32      47     177                                                          40   -0.75    0.43  1.0000
   0  22   0    4766     230                                                        5385    4.57   -0.50  1.0000
   0  22   0    5110     275                                                        5750    4.57   -0.50  1.0000
   0  22   1    1327     191                                                        1238    2.97    5.07  1.0000
   0  22  -1    1493     188                                                        1369    2.25    4.59  1.0000
   0  22   1    1459     191                                                        1369    2.97    5.07  1.0000
   0  22  -1    1242     172                                                        1125    2.25    4.59  1.0000
   0  22   2    6769     317                                                        7359    1.39    2.41  1.0000
   0  22  -2    6563     308                                                        7037    1.08    2.05  1.0000
   0  22   2    7230     322                                                        7839    1.39    2.41  1.0000
   0  22  -2    7238     318                                                        7736    1.08    2.05  1.0000
   0  22  -2    7117     339                                                        7611    1.08    2.05  1.0000
   0  22   3     706     183                                                         922    7.70    2.72  1.0000
   0  22  -3     905     186                                                        1182    7.08    1.50  1.0000
   0  22   3     650     164                                                         853    7.70    2.72  1.0000
   0  22  -3     715     176                                                         954    7.08    1.50  1.0000
   0  22   4    2649     201                                                        3280   -0.41    5.00  1.0000
   0  22  -4    2639     212                                                        3246   -0.87    5.04  1.0000
   0  22   4    2992     191                                                        3662   -0.41    5.00  1.0000
   0  22  -4    2905     209                                                        3541   -0.87    5.04  1.0000
   0  22   4    2780     204                                                        3426   -0.41    5.00  1.0000
   0  22  -4    3011     208                                                        3659   -0.87    5.04  1.0000
   0  22   5       1     166                                                         -52    0.66    0.42  1.0000
   0  22  -5      66     198                                                          27    1.75    1.23  1.0000
   0  22   5     130     153                                                         107    0.66    0.42  1.0000
   0  22  -5     161     160                                                          95    1.75    1.23  1.0000
   0  22  -5       9     173                                                        -114    1.75    1.23  1.0000
   0  22   6     596     170                                                        1094    6.01    1.96  1.0000
   0  22  -6     887     202                                                        1399    5.49    0.92  1.0000
   0  22   6     561     160                                                        1046    6.01    1.96  1.0000
   0  22  -6     537     174                                                         949    5.49    0.92  1.0000
   0  22   6     713     206                                                        1251    6.01    1.96  1.0000
   0  22  -6     710     170                                                        1174    5.49    0.92  1.0000
   0  22   7      76     149                                                         -68    5.85    2.44  1.0000
   0  22  -7      63     169                                                        -132    5.67    1.18  1.0000
   0  22   7     203     199                                                          35    5.85    2.44  1.0000
   0  22  -7     290     206                                                          83    5.67    1.18  1.0000
   0  22   8     721     155                                                         532   -0.01    2.90  1.0000
   0  22  -8     602     189                                                         404    0.61    3.19  1.0000
   0  22   8     288     187                                                         173   -0.01    2.90  1.0000
   0  22  -8     424     194                                                         261    0.61    3.19  1.0000
   0  22   9     374     154                                                         292   -2.39   -4.81  1.0000
   0  22   9     276     206                                                         199   -2.39   -4.81  1.0000
   0  22  -9     417     180                                                         325   -2.03   -4.54  1.0000
   0 -22  10     691     194                                                         321   -0.49   -6.86  1.0000
   0  22  10     675     160                                                         296   -1.33    7.63  1.0000
   0  22  10     424     196                                                         133   -1.33    7.63  1.0000
   0  22 -10     938     222                                                         501   -0.49    6.86  1.0000
   0 -22  11     253     173                                                         444    4.05   -1.73  1.0000
   0  22  11     239     157                                                         369    3.36    0.91  1.0000
   0  22  11     408     190                                                         577    3.36    0.91  1.0000
   0  22 -11     289     174                                                         495    4.05    1.73  1.0000
   0 -22  12     331     201                                                         350    0.88    0.58  1.0000
   0  22  12     189     156                                                         217    0.21   -0.79  1.0000
   0  22  12     245     173                                                         276    0.21   -0.79  1.0000
   0  22 -12     239     172                                                         254    0.88   -0.58  1.0000
   0 -22  13      87     182                                                         132   -1.92    1.55  1.0000
   0  22  13     155     155                                                         257   -2.68   -0.37  1.0000
   0  22  13     241     198                                                         365   -2.68   -0.37  1.0000
   0  22 -13     406     210                                                         511   -1.92   -1.55  1.0000
   0 -22  14      17     184                                                          -3    1.99   -2.20  1.0000
   0  22  14      83     152                                                          38    1.00    2.04  1.0000
   0  22  14      10     193                                                         -35    1.00    2.04  1.0000
   0  22 -14      17     221                                                         -47    1.99    2.20  1.0000
   0 -22  15     238     202                                                         209    0.91   -2.93  1.0000
   0  22  15     363     154                                                         320    0.99    2.89  1.0000
   0  22  15     378     168                                                         334    0.99    2.89  1.0000
   0  22 -15     225     219                                                         191    0.91    2.93  1.0000
   0 -22  16     453     215                                                         535   -3.15   -0.88  1.0000
   0  22  16     251     166                                                         344   -1.94    1.93  1.0000
   0  22  16     107     194                                                         168   -1.94    1.93  1.0000
   0  22 -16     350     207                                                         421   -3.15    0.88  1.0000
   0 -22  17      43     215                                                        -212   -3.57    3.14  1.0000
   0  22  17      73     159                                                         197   -4.29   -2.57  1.0000
   0  22  17      47     163                                                        -108   -4.29   -2.57  1.0000
   0  22 -17     104     205                                                         234   -3.57   -3.14  1.0000
   0 -22  18     727     221                                                         896   -2.92    4.20  1.0000
   0  22  18     411     146                                                         506   -3.99   -4.31  1.0000
   0  22  18     609     195                                                         737   -3.99   -4.31  1.0000
   0 -22  19     107     199                                                          94   -0.35   -2.57  1.0000
   0  22  19     229     170                                                         223   -0.29    3.66  1.0000
   0  22  19     426     190                                                         428   -0.29    3.66  1.0000
   0  22 -19     390     218                                                         378   -0.35    2.57  1.0000
   0 -22  20     470     225                                                         551    0.80    1.03  1.0000
   0  22  20     677     182                                                         804    2.01   -0.51  1.0000
   0  22  20     449     161                                                         553    2.01   -0.51  1.0000
   0 -22  21     442     228                                                         389   -2.47   -1.58  1.0000
   0  22  21     296     150                                                         242   -2.83    1.73  1.0000
   0  22  21     137     186                                                          96   -2.83    1.73  1.0000
   0  22 -21     418     214                                                         365   -2.47    1.58  1.0000
   0 -22  22     846     228                                                         774   -0.66   -0.66  1.0000
   0  22  22     418     175                                                         346   -0.86    1.15  1.0000
   0  22  22     398     188                                                         327   -0.86    1.15  1.0000
   0 -22  23       2     211                                                        -131   -1.15    0.07  1.0000
   0  22  23      36     151                                                          27   -0.66   -0.10  1.0000
   0  22  23       1     176                                                        -326   -0.66   -0.10  1.0000
   0 -22  24     365     226                                                         420    0.96   -1.94  1.0000
   0  22  24     394     182                                                         485    1.37    2.49  1.0000
   0  22  24     235     148                                                         304    1.37    2.49  1.0000
   0  22 -24     175     210                                                         214    0.96    1.94  1.0000
   0  22  25       2     150                                                         -50   -0.92    0.26  1.0000
   0  22  25     122     172                                                         140   -0.92    0.26  1.0000
   0  22  26     146     178                                                         194    0.77   -1.14  1.0000
   0  22  26     179     171                                                         232    0.77   -1.14  1.0000
   0  22  27     299     186                                                         387   -1.11   -3.29  1.0000
   0  22  27     313     166                                                         403   -1.11   -3.29  1.0000
   0  22 -27     207     211                                                         284    0.09   -2.65  1.0000
   0  22  28     204     187                                                         154    1.08    1.31  1.0000
   0  22  28       5     162                                                          -4    1.08    1.31  1.0000
   0  22  29     124     167                                                         161   -0.50   -1.03  1.0000
   0  22  29       1     156                                                           6   -0.50   -1.03  1.0000
   0  22  30      69     193                                                         114    0.08   -1.73  1.0000
   0  24   0      44     156                                                          65    0.29    1.67  1.0000
   0  24   1      55     146                                                         116   -0.38    2.48  1.0000
   0  24  -1      19     156                                                          -2   -0.34    3.16  1.0000
   0  24   2     120     154                                                          58    3.90    0.75  1.0000
   0  24  -2     424     166                                                         301    4.67    0.96  1.0000
   0  24   2     288     196                                                         198    3.90    0.75  1.0000
   0  24  -2     424     175                                                         301    4.67    0.96  1.0000
   0  24   3    1261     155                                                         980    1.95    3.29  1.0000
   0  24  -3    1300     174                                                        1012    2.17    2.76  1.0000
   0  24   3    1075     171                                                         816    1.95    3.29  1.0000
   0  24  -3    1305     174                                                        1017    2.17    2.76  1.0000
   0  24   4     173     144                                                         202   -1.19    0.61  1.0000
   0  24  -4     160     167                                                         207   -1.65    0.56  1.0000
   0  24   4       3     217                                                         -40   -1.19    0.61  1.0000
   0  24  -4      93     184                                                         129   -1.65    0.56  1.0000
   0  24   5     147     157                                                         253    3.24    0.15  1.0000
   0  24  -5      12     175                                                          33    2.77    0.69  1.0000
   0  24   5     148     170                                                         254    3.24    0.15  1.0000
   0  24  -5      52     204                                                         101    2.77    0.69  1.0000
   0  24   6     469     154                                                         377   -0.65    1.65  1.0000
   0  24  -6     354     179                                                         304    0.16    1.60  1.0000
   0  24   6      98     210                                                          58   -0.65    1.65  1.0000
   0  24  -6     269     218                                                         226    0.16    1.60  1.0000
   0  24   7      89     153                                                          71   -1.90    2.60  1.0000
   0  24  -7     168     161                                                         152   -1.64    2.24  1.0000
   0  24   7     140     200                                                         122   -1.90    2.60  1.0000
   0  24  -7     139     171                                                         123   -1.64    2.24  1.0000
   0  24   8     819     161                                                        1002   -1.81   -1.63  1.0000
   0  24  -8     672     173                                                         817   -2.41   -1.05  1.0000
   0  24   8     814     183                                                         997   -1.81   -1.63  1.0000
   0  24  -8    1073     221                                                        1256   -2.41   -1.05  1.0000
   0  24   9     378     155                                                         483    1.96   -0.30  1.0000
   0  24  -9     492     192                                                         563    1.26   -0.49  1.0000
   0  24   9     446     175                                                         559    1.96   -0.30  1.0000
   0  24  -9     338     187                                                         397    1.26   -0.49  1.0000
   0  24  10    1302     167                                                        1684   -6.39   -0.35  1.0000
   0  24 -10    1188     210                                                        1518   -5.97   -0.29  1.0000
   0  24  10    1046     214                                                        1386   -6.39   -0.35  1.0000
   0  24 -10    1335     236                                                        1687   -5.97   -0.29  1.0000
   0  24  11     124     173                                                         202    3.38    1.47  1.0000
   0  24  11     411     210                                                         558    3.38    1.47  1.0000
   0  24 -11      32     216                                                        -115    3.44    2.28  1.0000
   0 -24  12    1540     217                                                        1793    0.84    2.20  1.0000
   0  24  12    1482     170                                                        1842    1.95   -3.03  1.0000
   0  24  12    1654     223                                                        2034    1.95   -3.03  1.0000
   0  24 -12    1356     204                                                        1595    0.84   -2.20  1.0000
   0 -24  13       5     178                                                         -62    0.94   -1.24  1.0000
   0  24  13       7     161                                                        -200    1.67    0.98  1.0000
   0  24  13       7     208                                                        -386    1.67    0.98  1.0000
   0  24 -13      15     196                                                          30    0.94    1.24  1.0000
   0 -24  14    2192     211                                                        2085   -3.01    0.61  1.0000
   0  24  14    2240     177                                                        2155   -3.72   -1.15  1.0000
   0  24  14    2117     196                                                        2033   -3.72   -1.15  1.0000
   0  24 -14    2398     202                                                        2281   -3.01   -0.61  1.0000
   0 -24  15      14     205                                                         -76   -2.42   -1.36  1.0000
   0  24  15      12     164                                                        -123   -2.01    1.52  1.0000
   0  24  15      12     195                                                        -175   -2.01    1.52  1.0000
   0 -24  16     382     194                                                         533    1.18    2.33  1.0000
   0  24  16     391     163                                                         532    1.79   -1.91  1.0000
   0  24  16     427     206                                                         574    1.79   -1.91  1.0000
   0  24 -16     609     190                                                         797    1.18   -2.33  1.0000
   0 -24  17       1     192                                                         -13    0.40   -0.41  1.0000
   0  24  17      47     166                                                          34    0.78   -0.24  1.0000
   0  24  17      19     202                                                          11    0.78   -0.24  1.0000
   0  24 -17     224     217                                                         224    0.40    0.41  1.0000
   0  24  18      53     164                                                         -89   -0.21   -5.31  1.0000
   0  24  18      53     170                                                         -48   -0.21   -5.31  1.0000
   0  24 -18      51     215                                                         -56   -0.16   -5.22  1.0000
   0  24  19      12     177                                                         -32   -2.37    0.96  1.0000
   0  24  19       9     202                                                          14   -2.37    0.96  1.0000
   0  24  20     141     152                                                         194   -0.81    3.15  1.0000
   0  24  20      20     195                                                           0   -0.81    3.15  1.0000
   0  24 -20      15     218                                                         -44   -0.99    2.69  1.0000
   0  24  21     232     187                                                         169   -1.28   -2.20  1.0000
   0  24  21      12     187                                                        -206   -1.28   -2.20  1.0000
   0  24  22     464     157                                                         439   -1.57   -0.06  1.0000
   0  24  22       9     186                                                           3   -1.57   -0.06  1.0000
   0  24  23     393     179                                                         357    0.89   -0.35  1.0000
   0  24  23     234     189                                                         206    0.89   -0.35  1.0000
   0  24 -23     153     212                                                         149    0.58    0.12  1.0000
   0  24  24       4     176                                                        -221   -0.58    1.30  1.0000
   0  24  24       4     156                                                         -11   -0.58    1.30  1.0000
   0  24  25     230     183                                                         254   -0.36    1.02  1.0000
   0  24  25     244     181                                                         269   -0.36    1.02  1.0000
   0  24  26      97     171                                                         114   -1.23   -0.08  1.0000
   0  24  26     222     180                                                         248   -1.23   -0.08  1.0000
   0  24  27       2     185                                                        -113    0.82   -0.55  1.0000
   0  24  27      13     169                                                          18    0.82   -0.55  1.0000
   0  26   0     615     159                                                        1059    1.38    9.01  1.0000
   0  26   1     150     157                                                         100   -0.06    1.66  1.0000
   0  26  -1       8     166                                                        -121   -0.53    2.03  1.0000
   0  26   2    1631     186                                                        1576    0.67   -0.50  1.0000
   0  26  -2    1648     180                                                        1610    0.34    0.05  1.0000
   0  26   2    2106     232                                                        2044    0.67   -0.50  1.0000
   0  26  -2    1566     224                                                        1529    0.34    0.05  1.0000
   0  26   3       7     161                                                        -103    0.88   -1.72  1.0000
   0  26  -3      10     159                                                         -93    1.39   -1.77  1.0000
   0  26   3      33     181                                                          67    0.88   -1.72  1.0000
   0  26  -3      10     210                                                         -63    1.39   -1.77  1.0000
   0  26   4    1476     170                                                        1475    0.78   -2.49  1.0000
   0  26  -4    1592     188                                                        1620    0.72   -3.10  1.0000
   0  26   4    1836     219                                                        1836    0.78   -2.49  1.0000
   0  26  -4    1614     201                                                        1642    0.72   -3.10  1.0000
   0  26   5     483     157                                                         551    1.39    1.28  1.0000
   0  26  -5     363     178                                                         453    1.75    0.23  1.0000
   0  26   5     200     221                                                         243    1.39    1.28  1.0000
   0  26  -5     257     218                                                         333    1.75    0.23  1.0000
   0  26   6     879     161                                                         725    2.12   -0.96  1.0000
   0  26   6     995     183                                                         830    2.12   -0.96  1.0000
   0  26  -6    1148     193                                                         924    2.55    0.07  1.0000
   0  26   7     353     155                                                         303   -0.07    1.90  1.0000
   0  26   7     521     206                                                         460   -0.07    1.90  1.0000
   0  26  -7     366     220                                                         326    0.50    2.72  1.0000
   0  26   8     284     160                                                         315    0.03    0.68  1.0000
   0  26   8     299     180                                                         331    0.03    0.68  1.0000
   0  26  -8     495     193                                                         514   -0.13    0.29  1.0000
   0  26   9      25     156                                                         -31   -2.77    2.32  1.0000
   0  26   9      25     206                                                        -273   -2.77    2.32  1.0000
   0  26  -9      65     225                                                          20   -2.10    1.85  1.0000
   0  26  10     556     151                                                         321   -1.18   -4.84  1.0000
   0  26  10     806     207                                                         520   -1.18   -4.84  1.0000
   0  26 -10     503     229                                                         285   -1.37   -4.46  1.0000
   0  26  11     376     163                                                         282   -1.53   -1.13  1.0000
   0  26  11       7     176                                                        -101   -1.53   -1.13  1.0000
   0  26 -11     422     197                                                         333   -1.99   -0.20  1.0000
   0  26  12     475     168                                                         597    1.29    1.49  1.0000
   0  26  12     330     183                                                         432    1.29    1.49  1.0000
   0  26 -12     409     197                                                         505    1.00    1.33  1.0000
   0  26  13     230     168                                                         255   -5.45    0.42  1.0000
   0  26  13     436     214                                                         493   -5.45    0.42  1.0000
   0  26 -13     392     192                                                         447   -4.68    0.82  1.0000
   0  26  14       0     157                                                         -58    0.08   -0.44  1.0000
   0  26  14     239     209                                                         222    0.08   -0.44  1.0000
   0  26 -14     470     194                                                         424    0.95   -0.38  1.0000
   0  26  15     211     158                                                         187   -1.24   -2.13  1.0000
   0  26  15      11     212                                                         -11   -1.24   -2.13  1.0000
   0  26 -15     212     194                                                         199   -1.28   -2.94  1.0000
   0  26  16      84     165                                                         147    2.12    2.75  1.0000
   0  26  16      41     213                                                          82    2.12    2.75  1.0000
   0  26 -16     117     225                                                         187    1.94    2.98  1.0000
   0  26  17      83     170                                                         108   -2.02    0.49  1.0000
   0  26  17       8     206                                                         -38   -2.02    0.49  1.0000
   0  26 -17       6     230                                                         -37   -1.78    0.29  1.0000
   0  26  18      35     168                                                          88    2.39    0.89  1.0000
   0  26  18      59     176                                                         125    2.39    0.89  1.0000
   0  26  19     274     176                                                         345    0.10    2.11  1.0000
   0  26  19     206     171                                                         267    0.10    2.11  1.0000
   0  26 -19     367     230                                                         476   -1.12    1.65  1.0000
   0  26  20     180     175                                                         254    1.81    1.43  1.0000
   0  26  20      42     199                                                          79    1.81    1.43  1.0000
   0  26  21     176     181                                                         229   -3.38   -1.22  1.0000
   0  26  21     115     196                                                         154   -3.38   -1.22  1.0000
   0  26 -21      27     225                                                         -99   -3.51   -1.39  1.0000
   0  26  22     206     155                                                         329   -0.68   -2.67  1.0000
   0  26  22     205     167                                                         327   -0.68   -2.67  1.0000
   0  26  23     154     182                                                         141    2.57    0.28  1.0000
   0  26  23      13     184                                                         -76    2.57    0.28  1.0000
   0  26  24       8     180                                                         -65   -0.31   -2.06  1.0000
   0  26  24       8     186                                                         -36   -0.31   -2.06  1.0000
   0  28   2      88     190                                                          27   -3.49    0.18  1.0000
   0  28  -2      27     223                                                           3   -2.80   -0.20  1.0000
   0  28   3     490     191                                                         443   -1.54   -1.28  1.0000
   0  28  -3     502     220                                                         505   -0.88   -1.79  1.0000
   0  28   4      18     187                                                        -172   -3.06   -0.04  1.0000
   0  28  -4     218     190                                                         112   -3.68    0.71  1.0000
   0  28   5       4     212                                                         -48   -1.04   -1.10  1.0000
   0  28  -5     247     226                                                         250   -0.93   -0.75  1.0000
   0  28   6      44     216                                                        -358   -4.80    0.30  1.0000
   0  28  -6      27     192                                                        -242   -3.81    0.10  1.0000
   0  28   7     260     193                                                         417   -4.06    2.06  1.0000
   0  28  -7     283     226                                                         469   -4.38    1.57  1.0000
   0  28   8      17     151                                                          -3    1.95   -2.32  1.0000
   0  28   8      17     220                                                         -39    1.95   -2.32  1.0000
   0  28  -8     125     231                                                         197    1.99   -2.84  1.0000
   0  28   9      75     152                                                          75   -0.10   -1.19  1.0000
   0  28   9      76     216                                                          76   -0.10   -1.19  1.0000
   0  28  -9     230     196                                                         236   -0.20   -0.28  1.0000
   0  28  10      42     151                                                         104   -0.12    2.92  1.0000
   0  28  10     330     216                                                         482   -0.12    2.92  1.0000
   0  28 -10      55     193                                                         129   -0.61    3.15  1.0000
   0  28  11      49     153                                                          68   -0.57    1.30  1.0000
   0  28  11      55     216                                                          75   -0.57    1.30  1.0000
   0  28 -11       2     231                                                         -54   -1.11    0.27  1.0000
   0  28  12     100     154                                                         248   -4.18   -0.54  1.0000
   0  28  12      34     209                                                        -175   -4.18   -0.54  1.0000
   0  28 -12      34     224                                                         128   -3.99   -0.79  1.0000
   0  28  13     162     156                                                         305   -2.00   -3.02  1.0000
   0  28  13      25     185                                                        -109   -2.00   -3.02  1.0000
   0  28 -13      78     233                                                         167   -1.72   -2.64  1.0000
   0  28  14     115     161                                                         173    2.02    1.35  1.0000
   0  28  14      11     213                                                         -47    2.02    1.35  1.0000
   0  28  15     176     161                                                         147    0.63   -0.61  1.0000
   0  28  15       1     213                                                        -136    0.63   -0.61  1.0000
   0  28 -15     117     203                                                          84    0.43   -1.22  1.0000
   0  28  16     190     165                                                         276   -1.36    2.08  1.0000
   0  28  16     429     214                                                         555   -1.36    2.08  1.0000
   0  28 -16     313     236                                                         393   -2.23    1.48  1.0000
   0  28  17     263     178                                                         204    0.04   -5.11  1.0000
   0  28  17      68     216                                                          16    0.04   -5.11  1.0000
   0  28 -17      44     232                                                        -164    0.41   -4.79  1.0000
   0  28  18       0     141                                                        -180    0.01   -0.43  1.0000
   0  28  18       0     204                                                        -226    0.01   -0.43  1.0000
   0  28  19     276     176                                                         255    0.56    0.80  1.0000
   0  28  19     160     210                                                         144    0.56    0.80  1.0000
   0  28 -19       0     230                                                         -20    0.44    0.08  1.0000
   0  28  20       1     180                                                         -85    0.50    0.29  1.0000
   0  28  20       1     201                                                        -345    0.50    0.29  1.0000
   0  28  21     155     176                                                         359    1.50   -4.68  1.0000
   0  28  21     149     202                                                         351    1.50   -4.68  1.0000
   0  30   2     168     185                                                         199    1.35   -0.70  1.0000
   0  30   3       9     187                                                        -105    1.16    1.88  1.0000
   0  30  -3      19     228                                                        -179    1.97    2.45  1.0000
   0  30   4     204     196                                                         441    3.64    3.87  1.0000
   0  30  -4     130     204                                                         282    2.45    3.99  1.0000
   0  30   5      44     194                                                          41    1.19   -0.69  1.0000
   0  30  -5     241     238                                                         244    0.48   -0.41  1.0000
   0  30   6     728     234                                                        1014   -3.40   -4.96  1.0000
   0  30  -6     381     210                                                         522   -2.64   -4.18  1.0000
   0  30   7      21     227                                                         108   -2.46   -3.46  1.0000
   0  30  -7      27     237                                                         -10   -2.22   -3.08  1.0000
   0  30   8     500     221                                                         566   -0.38   -1.04  1.0000
   0  30  -8      54     233                                                          81   -0.90   -1.18  1.0000
   0  30   9     541     197                                                         486    0.21   -1.04  1.0000
   0  30  -9     134     239                                                         118   -0.08   -0.53  1.0000
   0  30  10     540     235                                                         657   -1.03   -1.71  1.0000
   0  30 -10     709     241                                                         805   -1.18   -0.48  1.0000
   0  30  11      11     218                                                         -31   -0.44   -2.39  1.0000
   0  30 -11      15     234                                                        -225   -0.33   -2.78  1.0000
   0  30  12       6     225                                                        -107   -1.45   -1.02  1.0000
   0  30 -12     835     245                                                         983   -0.98   -1.65  1.0000
   0  30  13       2     221                                                         -28    0.26    0.87  1.0000
   0  30 -13       3     240                                                        -292   -0.11    1.30  1.0000
   0  30  14       8     223                                                        -154   -1.37    1.50  1.0000
   0  30 -14      13     238                                                         -60   -1.65    2.09  1.0000
   0  30  15       7     186                                                        -192    1.08    1.65  1.0000
   0  30  16       3     217                                                         -17   -1.26   -0.05  1.0000
   0  30 -16      24     243                                                          38   -1.26   -0.37  1.0000
   0  32   2      10     235                                                         -42    1.96   -1.26  1.0000
   0  32   3       5     226                                                         -80    0.25    1.57  1.0000
   0  32  -3     235     239                                                         311    0.03    1.69  1.0000
   0  32   4     345     203                                                         522   -2.90    1.15  1.0000
   0  32  -4      49     206                                                         132   -3.22    0.47  1.0000
   0  32   5       6     197                                                        -109    0.28    1.70  1.0000
   0  32  -5     124     234                                                         172    0.74    1.29  1.0000
   0  32   6     151     200                                                         223    2.91   -2.73  1.0000
   0  32  -6     273     247                                                         335    2.16   -2.28  1.0000
   0  32   7      63     198                                                          93    1.24    0.02  1.0000
   0  32  -7       2     207                                                         -76    1.04    0.23  1.0000
   0  32   8      20     232                                                        -105   -1.90    2.60  1.0000
   0  32  -8     448     209                                                         467   -1.45    2.11  1.0000
   0  32   9      12     226                                                        -326   -2.15   -1.27  1.0000
   0  32  -9      10     243                                                         -80   -2.00   -1.19  1.0000
  -1  -1  41       8     253                                                          24   -1.88   -0.03  1.0000
  -1   1  41     352     252                                                         484   -2.65   -0.74  1.0000
  -1  -1  40      27     251                                                          80   -3.02   -1.14  1.0000
  -1   1  40     256     256                                                         430   -3.57    0.27  1.0000
  -1  -1  39      19     211                                                          23    0.21    0.24  1.0000
  -1   1  39       1     218                                                        -157    0.57    0.18  1.0000
  -1  -1  38       4     209                                                         -48    1.53   -0.19  1.0000
  -1   1  38      58     238                                                          32    1.34    0.48  1.0000
  -1  -1  37       9     240                                                        -279   -2.15   -0.15  1.0000
  -1   1  37       0     206                                                          11   -2.74    0.85  1.0000
  -1  -1  36     180     239                                                         343   -3.02    2.95  1.0000
  -1   1  36      53     241                                                         164   -1.51   -5.04  1.0000
  -1  -1  35     197     197                                                         165    2.97   -3.39  1.0000
  -1   1  35     591     223                                                         577    2.74    3.68  1.0000
  -1  -1  34      32     227                                                         -24   -2.13    3.53  1.0000
  -1   1  34      17     196                                                         -23   -1.74   -2.49  1.0000
  -1  -1  33     722     232                                                         579    1.07    1.75  1.0000
  -1   1  33    1044     227                                                         850    1.08   -2.03  1.0000
  -1  -1  32      58     223                                                          43   -2.12   -0.61  1.0000
  -1   1  32     289     184                                                         268   -2.05    0.62  1.0000
   1   1 -32     260     167                                                         238   -2.12    0.61  1.0000
   1  -1 -32     194     143                                                         176   -2.05   -0.62  1.0000
  -1  -1  31     484     186                                                         654   -1.68   -2.43  1.0000
  -1   1  31     481     226                                                         602   -1.33    1.71  1.0000
   1   1 -31     584     172                                                         763   -1.68    2.43  1.0000
   1  -1 -31     489     156                                                         615   -1.33   -1.71  1.0000
  -1  -1  30    1455     195                                                        1331    0.41    1.51  1.0000
  -1   1  30    1392     226                                                        1353    1.43   -1.08  1.0000
   1   1 -30    1529     159                                                        1402    0.41   -1.51  1.0000
   1  -1 -30    1307     158                                                        1270    1.43    1.08  1.0000
  -1  -1  29     485     190                                                         542   -1.32   -0.16  1.0000
  -1   1  29     339     177                                                         423   -1.07    1.17  1.0000
   1   1 -29     442     166                                                         498   -1.32    0.16  1.0000
   1  -1 -29     593     158                                                         702   -1.07   -1.17  1.0000
  -1  -1  28      39     188                                                         -77   -4.08    2.06  1.0000
  -1   1  28     427     212                                                         191   -4.35   -2.68  1.0000
   1   1 -28     450     130                                                         224   -4.08   -2.06  1.0000
   1  -1 -28      49     137                                                         -25   -4.35    2.68  1.0000
   1   1 -28      39     172                                                         -91   -4.08   -2.06  1.0000
   1  -1 -28      49     150                                                        -155   -4.35    2.68  1.0000
  -1  -1  27    1879     220                                                        2114   -1.05   -1.61  1.0000
  -1   1  27    1807     213                                                        1990   -0.52    1.49  1.0000
   1   1 -27    1501     149                                                        1712   -1.05    1.61  1.0000
   1  -1 -27    1625     165                                                        1799   -0.52   -1.49  1.0000
   1   1 -27    1782     173                                                        2012   -1.05    1.61  1.0000
   1  -1 -27    1740     167                                                        1920   -0.52   -1.49  1.0000
  -1  -1  26    1361     208                                                        1413    0.49   -1.50  1.0000
  -1   1  26    1169     177                                                        1136   -0.44    2.57  1.0000
   1   1 -26     988     138                                                        1032    0.49    1.50  1.0000
   1  -1 -26    1284     144                                                        1249   -0.44   -2.57  1.0000
   1   1 -26    1026     173                                                        1071    0.49    1.50  1.0000
   1  -1 -26    1460     174                                                        1424   -0.44   -2.57  1.0000
  -1  -1  25    2671     217                                                        2804   -0.19   -0.92  1.0000
  -1   1  25    2115     180                                                        2359   -0.30    1.91  1.0000
   1   1 -25    2618     163                                                        2749   -0.19    0.92  1.0000
   1  -1 -25    2143     158                                                        2389   -0.30   -1.91  1.0000
   1   1 -25    2606     184                                                        2737   -0.19    0.92  1.0000
   1  -1 -25    2271     162                                                        2525   -0.30   -1.91  1.0000
  -1  -1  24     517     183                                                         271    6.56    0.23  1.0000
  -1   1  24     557     182                                                         226    7.57   -1.50  1.0000
   1   1 -24     554     136                                                         295    6.56   -0.23  1.0000
   1  -1 -24     606     137                                                         264    7.57    1.50  1.0000
  -1  -1  23    1391     164                                                        1099   -0.92    3.42  1.0000
  -1   1  23    1251     169                                                         962   -1.12   -3.74  1.0000
   1   1 -23    1210     129                                                         944   -0.92   -3.42  1.0000
   1  -1 -23    1291     143                                                         991   -1.12    3.74  1.0000
  -1  -1  22    6376     229                                                        7242    1.07   -3.95  1.0000
  -1   1  22    5356     186                                                        6127    0.39    4.29  1.0000
   1   1 -22    6216     201                                                        7070    1.07    3.95  1.0000
   1  -1 -22    5980     204                                                        6795    0.39   -4.29  1.0000
   1   1 -22    6248     278                                                        7104    1.07    3.95  1.0000
   1  -1 -22    7061     311                                                        7945    0.39   -4.29  1.0000
  -1  -1  21    9004     214                                                        8852    2.79   -1.63  1.0000
   1   1 -21    9431     268                                                        9254    2.79    1.63  1.0000
   1  -1 -21    9539     279                                                        9556    2.20   -1.98  1.0000
   1   1 -21    9097     192                                                        8922    2.79    1.63  1.0000
   1  -1 -21    8815     199                                                        8830    2.20   -1.98  1.0000
   1   1 -21    9521     401                                                        9343    2.79    1.63  1.0000
   1  -1 -21    8324     259                                                        8338    2.20   -1.98  1.0000
  -1  -1  20    4949     190                                                        3779   -8.52   -4.79  1.0000
   1   1 -20    4602     143                                                        3494   -8.52    4.79  1.0000
   1  -1 -20    4516     141                                                        3422   -8.26   -4.57  1.0000
   1   1 -20    4685     149                                                        3567   -8.52    4.79  1.0000
   1  -1 -20    4465     153                                                        3377   -8.26   -4.57  1.0000
   1   1 -20    4067     330                                                        3024   -8.52    4.79  1.0000
   1  -1 -20    4222     275                                                        3163   -8.26   -4.57  1.0000
  -1  -1  19    6795     204                                                        6659   -0.02    1.93  1.0000
   1   1 -19    6098     157                                                        5986   -0.02   -1.93  1.0000
   1  -1 -19    6785     179                                                        6604   -0.16    3.07  1.0000
   1   1 -19    6291     165                                                        6178   -0.02   -1.93  1.0000
   1  -1 -19    5956     166                                                        5786   -0.16    3.07  1.0000
   1   1 -19    6351     240                                                        6237   -0.02   -1.93  1.0000
   1  -1 -19    6135     228                                                        5962   -0.16    3.07  1.0000
  -1  -1  18    4335     171                                                        4845   -2.86   -3.28  1.0000
   1   1 -18    4493     153                                                        5022   -2.86    3.28  1.0000
   1  -1 -18    4647     164                                                        5299   -3.49   -3.20  1.0000
   1   1 -18    4331     157                                                        4850   -2.86    3.28  1.0000
   1  -1 -18    4761     172                                                        5421   -3.49   -3.20  1.0000
   1   1 -18    4659     348                                                        5198   -2.86    3.28  1.0000
   1  -1 -18    4372     277                                                        5004   -3.49   -3.20  1.0000
  -1  -1  17   13778     385                                                       16045   -2.57  -11.01  1.0000
   1   1 -17   13341     245                                                       15569   -2.57   11.01  1.0000
   1  -1 -17   12383     301                                                       14318   -1.88  -10.96  1.0000
   1   1 -17   12567     275                                                       14727   -2.57   11.01  1.0000
   1  -1 -17   13510     234                                                       15536   -1.88  -10.96  1.0000
   1   1 -17   12839     334                                                       15023   -2.57   11.01  1.0000
   1  -1 -17   13225     366                                                       15228   -1.88  -10.96  1.0000
  -1  -1  16   11382     226                                                        9004   10.42   -8.52  1.0000
   1   1 -16   12147     238                                                        9655   10.42    8.52  1.0000
   1  -1 -16   12750     222                                                        9751   12.27   -8.56  1.0000
   1   1 -16   11441     212                                                        9021   10.42    8.52  1.0000
   1  -1 -16   11918     298                                                        9018   12.27   -8.56  1.0000
   1   1 -16   11985     463                                                        9510   10.42    8.52  1.0000
   1  -1 -16   13330     419                                                       10264   12.27   -8.56  1.0000
  -1  -1  15    8262     175                                                        6241   -2.02   10.96  1.0000
   1   1 -15    9069     177                                                        6919   -2.02  -10.96  1.0000
   1  -1 -15    9374     171                                                        7005   -2.02   12.54  1.0000
   1   1 -15    9155     175                                                        6995   -2.02  -10.96  1.0000
   1  -1 -15    9156     177                                                        6815   -2.02   12.54  1.0000
   1   1 -15    9030     353                                                        6885   -2.02  -10.96  1.0000
   1  -1 -15    9695     296                                                        7285   -2.02   12.54  1.0000
  -1  -1  14    4584     163                                                        2273   16.62   -4.61  1.0000
   1   1 -14    5082     152                                                        2590   16.62    4.61  1.0000
   1  -1 -14    4714     147                                                        2568   14.81   -3.83  1.0000
   1   1 -14    4788     129                                                        2377   16.62    4.61  1.0000
   1  -1 -14    4672     134                                                        2537   14.81   -3.83  1.0000
   1   1 -14    5024     211                                                        2548   16.62    4.61  1.0000
   1  -1 -14    4690     250                                                        2550   14.81   -3.83  1.0000
   1   1 -13   11383     203                                                       10152   -2.08   -6.10  1.0000
   1   1 -13   11888     187                                                       10630   -2.08   -6.10  1.0000
   1  -1 -13   12022     258                                                       11252   -1.69    2.63  1.0000
   1   1 -13   11376     231                                                       10146   -2.08   -6.10  1.0000
   1   1 -12    1336      94                                                         314  -30.16   25.24  1.0000
   1   1 -12    1425     107                                                         272  -30.16   25.24  1.0000
   1  -1 -12    1142     112                                                         408  -29.30  -25.97  1.0000
   1   1 -11   36926     698                                                       37048  -28.73  -17.91  1.0000
  -1   1  11   37367     695                                                       38747  -31.28  -17.02  1.0000
   1   1 -11   38095     701                                                       38254  -28.73  -17.91  1.0000
   1  -1 -11   36111     695                                                       37527  -31.28   17.02  1.0000
   1   1 -11   38081     711                                                       38240  -28.73  -17.91  1.0000
   1   1 -10    9467     152                                                        3132   28.40   12.51  1.0000
   1   1 -10    9501     197                                                        3152   28.40   12.51  1.0000
  -1   1  10    9258     130                                                        3358   26.44   15.15  1.0000
   1  -1 -10    9099     140                                                        3231   26.44  -15.15  1.0000
   1   1 -10   10451     336                                                        3714   28.40   12.51  1.0000
   1   1  -9  188134    1481                                                      183754   -5.39   -9.82  1.0000
   1   1  -9  179535    1417                                                      175252   -5.39   -9.82  1.0000
  -1   1   9  184742    1415                                                      178197   -3.93  -11.05  1.0000
   1  -1  -9  184972    1463                                                      178421   -3.93   11.05  1.0000
   1   1  -9  176784    1375                                                      172532   -5.39   -9.82  1.0000
   1   1  -8   71929    1456                                                       93700    3.04   39.74  1.0000
  -1   1   8   74110    1443                                                       92763    3.61   35.16  1.0000
   1  -1  -8   75496    1461                                                       94459    3.61  -35.16  1.0000
   1   1  -8   68618    1382                                                       89879    3.04   39.74  1.0000
  -1  -1   8   72582    1442                                                       94594    3.04  -39.74  1.0000
   1   1  -7  199812    2724                                                      348500  -94.96  -88.20  1.0000
  -1   1   7  195261    2644                                                      351222 -103.33  -75.09  1.0000
   1  -1  -7  200191    2701                                                      357650 -103.33   75.09  1.0000
   1   1  -7  208727    2707                                                      360492  -94.96  -88.20  1.0000
  -1  -1   7  210481    2688                                                      362517  -94.96   88.20  1.0000
   1   1  -6  107768    1566                                                      100586   -6.40  -22.99  1.0000
  -1   1   6  105341    1602                                                      105122  -13.20  -19.01  1.0000
   1  -1  -6  104672    1763                                                      104197  -13.20   19.01  1.0000
   1   1  -6  113288    1854                                                      105945   -6.40  -22.99  1.0000
  -1  -1   6  116694    1647                                                      108998   -6.40   22.99  1.0000
   1   1  -5   33242     678                                                       35195   10.71   36.09  1.0000
  -1   1   5   28554     607                                                       32772   16.07   29.79  1.0000
  -1   1   5   30201     635                                                       34594   16.07   29.79  1.0000
   1  -1  -5   30625     646                                                       35012   16.07  -29.79  1.0000
   1   1  -5   33732     777                                                       35719   10.71   36.09  1.0000
  -1  -1   5   32331     618                                                       34160   10.71  -36.09  1.0000
   1   1   4   53869     198                                                        4392  -86.26  -85.59  1.0000
   1  -1   5   35449     588                                                       24199  -40.10  -59.74  1.0000
  -1   1  -5   36509     571                                                       25578  -40.10   59.74  1.0000
  -1  -1  -5   36507     591                                                       25457  -45.05  -65.01  1.0000
   1   1   5   36320     578                                                       25684  -45.05   65.01  1.0000
  -1  -1  -5   36639     920                                                       25591  -45.05  -65.01  1.0000
   1  -1   5   39526     650                                                       28158  -40.10  -59.74  1.0000
  -1   1  -6  185754    1868                                                      229100    9.09  -34.57  1.0000
  -1  -1  -6  183635    2226                                                      224438    5.70   34.38  1.0000
  -1   1  -7   66496    1102                                                       66319   58.12    0.87  1.0000
  -1  -1  -7   65630    1085                                                       65036   61.41    0.29  1.0000
   1   1   7   66240    1214                                                       65682   61.41   -0.29  1.0000
  -1  -1  -7   67509    1161                                                       67013   61.41    0.29  1.0000
  -1   1  -7   67337    1339                                                       67201   58.12    0.87  1.0000
   1  -1   7   65998    1173                                                       65793   58.12   -0.87  1.0000
   1   1   8   65312    1534                                                       99786  -33.02  -32.33  1.0000
  -1  -1  -8   65516    1764                                                      100094  -33.02   32.33  1.0000
   1  -1   8   67115    1576                                                       99601  -33.14   28.98  1.0000
  -1   1  -9  167028    1700                                                      198511   -4.24   28.33  1.0000
   1   1   9  174006    1712                                                      206370   -5.74   27.77  1.0000
  -1  -1  -9  174092    1698                                                      206462   -5.74  -27.77  1.0000
   1  -1  10     121      92                                                         984  -15.41    4.63  1.0000
   1   1  10     248     246                                                        1272  -14.60   -4.48  1.0000
  -1   1 -10     189     103                                                        1202  -15.41   -4.63  1.0000
  -1  -1 -10     131     153                                                         944  -14.60    4.48  1.0000
   1  -1  11   20355     462                                                       20371    2.30   -2.57  1.0000
  -1   1 -11   23032     519                                                       23024    2.30    2.57  1.0000
  -1  -1 -11   19838     501                                                       20923    0.22   -4.33  1.0000
  -1   1 -11   22869     527                                                       22861    2.30    2.57  1.0000
  -1  -1 -11   20303     489                                                       21401    0.22   -4.33  1.0000
  -1   1 -11   21242     477                                                       21234    2.30    2.57  1.0000
   1  -1  12    1238     124                                                        1965    2.16   -9.34  1.0000
   1   1  12    1523     121                                                        2170    1.90    7.38  1.0000
  -1   1 -12    1599     144                                                        2450    2.16    9.34  1.0000
  -1  -1 -12    1755     134                                                        2429    1.90   -7.38  1.0000
  -1   1 -12    1397     119                                                        2193    2.16    9.34  1.0000
  -1  -1 -12    1515     122                                                        2141    1.90   -7.38  1.0000
  -1   1 -12    1613     125                                                        2468    2.16    9.34  1.0000
  -1  -1 -12    1432     207                                                        2040    1.90   -7.38  1.0000
   1  -1  13    4509     145                                                        5200  -11.07    3.16  1.0000
   1   1  13    5315     160                                                        5732   -9.38   -1.67  1.0000
  -1   1 -13    4712     162                                                        5428  -11.07   -3.16  1.0000
  -1  -1 -13    5889     175                                                        6332   -9.38    1.67  1.0000
  -1   1 -13    4763     143                                                        5484  -11.07   -3.16  1.0000
  -1  -1 -13    5312     159                                                        5725   -9.38    1.67  1.0000
  -1   1 -13    5228     164                                                        5994  -11.07   -3.16  1.0000
  -1  -1 -13    5484     169                                                        5906   -9.38    1.67  1.0000
   1  -1  14    3627     141                                                        2655   17.38   -3.50  1.0000
   1   1  14    3477     136                                                        2552   17.44    3.66  1.0000
  -1   1 -14    3215     162                                                        2291   17.38    3.50  1.0000
  -1  -1 -14    3645     132                                                        2688   17.44   -3.66  1.0000
  -1   1 -14    3361     127                                                        2428   17.38    3.50  1.0000
  -1  -1 -14    3463     151                                                        2518   17.44   -3.66  1.0000
  -1   1 -14    3192     280                                                        2270   17.38    3.50  1.0000
  -1  -1 -14    3489     201                                                        2542   17.44   -3.66  1.0000
   1  -1  15    5867     172                                                        4307   -2.18    8.77  1.0000
   1   1  15    5159     148                                                        3892   -2.98   -7.80  1.0000
  -1   1 -15    5503     141                                                        3988   -2.18   -8.77  1.0000
  -1  -1 -15    5439     145                                                        4145   -2.98    7.80  1.0000
  -1   1 -15    5669     144                                                        4130   -2.18   -8.77  1.0000
  -1  -1 -15    5026     228                                                        3784   -2.98    7.80  1.0000
  -1   1 -15    5800     337                                                        4242   -2.18   -8.77  1.0000
  -1  -1 -15    5525     325                                                        4220   -2.98    7.80  1.0000
   1  -1  16    8601     218                                                        9133   -4.99   -4.18  1.0000
   1   1  16    9192     227                                                        9586   -4.29    4.08  1.0000
  -1   1 -16    9445     246                                                       10000   -4.99    4.18  1.0000
  -1  -1 -16    9638     238                                                       10048   -4.29   -4.08  1.0000
  -1  -1 -16    8481     368                                                        8862   -4.29   -4.08  1.0000
  -1   1 -16    7724     469                                                        8220   -4.99    4.18  1.0000
  -1  -1 -16    8446     397                                                        8826   -4.29   -4.08  1.0000
   1  -1  17   16944     465                                                       21530    5.30  -10.84  1.0000
   1   1  17   16837     458                                                       21418    3.58   11.72  1.0000
  -1   1 -17   17517     493                                                       22175    5.30   10.84  1.0000
  -1  -1 -17   15356     439                                                       19743    3.58  -11.72  1.0000
  -1   1 -17   15532     462                                                       19934    5.30   10.84  1.0000
  -1  -1 -17   16010     474                                                       20484    3.58  -11.72  1.0000
  -1   1 -17   16987     514                                                       21578    5.30   10.84  1.0000
  -1  -1 -17   16728     565                                                       21295    3.58  -11.72  1.0000
   1  -1  18    1016     137                                                        1901   -5.48   -7.48  1.0000
   1   1  18    1075     151                                                        1970   -6.33    7.01  1.0000
  -1   1 -18     940     219                                                        1806   -5.48    7.48  1.0000
  -1  -1 -18    1112     278                                                        2005   -6.33   -7.01  1.0000
  -1   1 -18     959     178                                                        1833   -5.48    7.48  1.0000
  -1  -1 -18     997     136                                                        1848   -6.33   -7.01  1.0000
   1  -1  19   19679     412                                                       14745  -13.37    7.29  1.0000
   1   1  19   20326     415                                                       15156  -13.94   -7.42  1.0000
  -1   1 -19   19633     380                                                       14698  -13.37   -7.29  1.0000
  -1  -1 -19   20639     395                                                       15435  -13.94    7.42  1.0000
  -1   1 -19   18036     388                                                       13318  -13.37   -7.29  1.0000
  -1  -1 -19   18914     387                                                       13944  -13.94    7.42  1.0000
  -1   1 -19   17271     508                                                       12660  -13.37   -7.29  1.0000
  -1  -1 -19   18490     533                                                       13580  -13.94    7.42  1.0000
   1  -1  20   11865     334                                                       12263    5.44   -3.11  1.0000
   1   1  20   12870     360                                                       13520    5.20    3.86  1.0000
  -1   1 -20   11615     342                                                       11991    5.44    3.11  1.0000
  -1  -1 -20   12031     354                                                       12674    5.20   -3.86  1.0000
  -1   1 -20   10910     316                                                       11273    5.44    3.11  1.0000
  -1  -1 -20   11329     333                                                       11951    5.20   -3.86  1.0000
  -1   1 -20   11562     436                                                       11937    5.44    3.11  1.0000
  -1  -1 -20   12122     482                                                       12768    5.20   -3.86  1.0000
   1  -1  21    2433     179                                                        2298    0.93    1.81  1.0000
   1   1  21    2408     168                                                        2199    0.69   -2.35  1.0000
  -1   1 -21    2140     137                                                        2014    0.93   -1.81  1.0000
  -1   1 -21    2104     144                                                        1979    0.93   -1.81  1.0000
  -1  -1 -21    2132     150                                                        1935    0.69    2.35  1.0000
  -1   1 -21    2153     308                                                        2027    0.93   -1.81  1.0000
  -1  -1 -21    2292     231                                                        2088    0.69    2.35  1.0000
   1  -1  22    1085     155                                                        1444    1.73   -3.64  1.0000
   1   1  22     902     165                                                        1238    1.91    3.54  1.0000
  -1   1 -22    1063     139                                                        1419    1.73    3.64  1.0000
  -1  -1 -22    1105     144                                                        1474    1.91   -3.54  1.0000
  -1   1 -22    1096     194                                                        1457    1.73    3.64  1.0000
  -1  -1 -22    1124     152                                                        1496    1.91   -3.54  1.0000
   1  -1  23    1912     180                                                        2483    1.91    4.03  1.0000
   1   1  23    1756     156                                                        2314    2.35   -3.86  1.0000
  -1   1 -23    1645     151                                                        2178    1.91   -4.03  1.0000
  -1  -1 -23    1569     156                                                        2099    2.35    3.86  1.0000
  -1   1 -23    1432     164                                                        1931    1.91   -4.03  1.0000
  -1  -1 -23    1531     163                                                        2055    2.35    3.86  1.0000
   1  -1  24      14     153                                                          93   -1.41   -4.38  1.0000
  -1   1 -24      15     149                                                         103   -1.41    4.38  1.0000
  -1  -1 -24      20     139                                                         102   -1.23   -4.19  1.0000
   1  -1  25    3757     228                                                        3992   -1.74    2.23  1.0000
   1   1  25    3888     213                                                        4124   -2.00   -2.32  1.0000
  -1   1 -25    3111     167                                                        3323   -1.74   -2.23  1.0000
  -1  -1 -25    3153     180                                                        3366   -2.00    2.32  1.0000
  -1   1 -25    3401     181                                                        3623   -1.74   -2.23  1.0000
  -1  -1 -25    3219     178                                                        3434   -2.00    2.32  1.0000
   1  -1  26      23     176                                                          72    0.58   -2.73  1.0000
   1   1  26       9     183                                                        -263    0.91    1.94  1.0000
  -1   1 -26      15     135                                                         -24    0.58    2.73  1.0000
  -1  -1 -26      46     144                                                          94    0.91   -1.94  1.0000
   1  -1  27      28     208                                                        -249   -3.51    1.54  1.0000
   1   1  27     209     168                                                         219   -2.80   -1.08  1.0000
  -1   1 -27      28     151                                                         -17   -3.51   -1.54  1.0000
  -1  -1 -27      66     162                                                          65   -2.80    1.08  1.0000
   1  -1  28    1153     188                                                        1362    4.37   -1.62  1.0000
   1   1  28    1501     182                                                        1757    4.91    1.58  1.0000
  -1   1 -28    1283     160                                                        1509    4.37    1.62  1.0000
  -1  -1 -28    1352     160                                                        1589    4.91   -1.58  1.0000
   1  -1  29     256     208                                                         127   -4.06    0.11  1.0000
   1   1  29      24     213                                                         -69   -3.44   -1.02  1.0000
  -1   1 -29     153     153                                                          57   -4.06   -0.11  1.0000
  -1  -1 -29      24     146                                                        -100   -3.44    1.02  1.0000
   1  -1  30     307     189                                                         350   -3.00   -0.97  1.0000
   1   1  30     222     185                                                         267   -2.84    1.21  1.0000
  -1   1 -30     195     163                                                         227   -3.00    0.97  1.0000
  -1  -1 -30     333     151                                                         390   -2.84   -1.21  1.0000
   1  -1  31      40     216                                                         -23    4.59    0.27  1.0000
   1   1  31     236     174                                                         321    5.30   -0.21  1.0000
   1  -1  32       9     215                                                         -10    0.47   -2.11  1.0000
   1   1  32      52     220                                                          17   -0.04    2.29  1.0000
   1  -1  33     931     221                                                        1019    0.84    2.81  1.0000
   1   1  33     732     190                                                         844    1.16   -3.87  1.0000
   1  -1  34     645     230                                                         893   -1.06    3.52  1.0000
   1   1  34     475     219                                                         671   -0.63   -3.19  1.0000
   1  -1  35     329     241                                                         368   -3.34   -0.46  1.0000
   1   1  35     485     234                                                         486   -2.30    0.85  1.0000
   1  -1  36     171     235                                                         241    1.25    1.95  1.0000
   1   1  36      87     200                                                         115    0.82   -0.93  1.0000
   1  -1  37     720     242                                                         745    2.93   -3.40  1.0000
   1   1  37     403     231                                                         414    2.05    2.05  1.0000
   1  -1  38     154     243                                                         192   -2.50   -1.01  1.0000
   1   1  38      33     236                                                        -334   -4.09    0.90  1.0000
   1  -1  39     132     250                                                         141    0.22   -0.24  1.0000
   1   1  39     241     217                                                         259    0.09    0.81  1.0000
   1  -1  40     262     221                                                         260   -0.87    0.18  1.0000
   1   1  40      86     256                                                          70   -0.92   -0.82  1.0000
  -1  -3  41       7     259                                                        -102    0.48   -1.90  1.0000
  -1   3  41      23     216                                                          40    0.41    1.78  1.0000
  -1  -3  40       3     215                                                         -89    1.09   -0.78  1.0000
  -1   3  40      16     248                                                          43    1.10    1.53  1.0000
  -1  -3  39      44     216                                                          44    1.09    1.42  1.0000
  -1   3  39       3     217                                                        -144    0.79   -0.99  1.0000
  -1  -3  38     114     239                                                         134    2.09   -0.08  1.0000
  -1   3  38      95     238                                                         121    1.41    0.64  1.0000
  -1  -3  37     352     239                                                         450    1.15   -1.72  1.0000
  -1   3  37     727     209                                                         818    0.25    2.02  1.0000
  -1  -3  36     208     232                                                         143   -3.77    0.31  1.0000
  -1   3  36       7     227                                                         -21   -1.88    0.65  1.0000
  -1  -3  35     549     229                                                         615    1.07    1.04  1.0000
  -1   3  35     313     189                                                         397    1.77   -1.26  1.0000
  -1  -3  34     395     229                                                         512   -0.40    2.34  1.0000
  -1   3  34     685     223                                                         820   -1.32   -2.42  1.0000
  -1  -3  33     239     228                                                         241   -0.42    0.33  1.0000
  -1   3  33     266     185                                                         277   -0.18   -0.41  1.0000
  -1  -3  32       7     233                                                         -94    1.46   -1.16  1.0000
  -1   3  32     122     215                                                         185    0.82    1.69  1.0000
   1   3 -32      54     153                                                          98    1.46    1.16  1.0000
   1  -3 -32       7     161                                                        -135    0.82   -1.69  1.0000
  -1  -3  31     263     223                                                         427   -6.47   -0.59  1.0000
  -1   3  31     362     174                                                         572   -6.28    1.20  1.0000
   1   3 -31     272     169                                                         437   -6.47    0.59  1.0000
   1  -3 -31     307     160                                                         499   -6.28   -1.20  1.0000
  -1  -3  30     665     219                                                         795    3.40    0.00  1.0000
  -1   3  30     742     216                                                         887    4.01   -0.49  1.0000
   1   3 -30     457     179                                                         566    3.40    0.00  1.0000
   1  -3 -30     589     162                                                         711    4.01    0.49  1.0000
  -1  -3  29      41     217                                                         -21    2.59    3.85  1.0000
   1   3 -29      41     164                                                         -81    2.59   -3.85  1.0000
   1  -3 -29      34     142                                                         -46    2.77    3.21  1.0000
  -1  -3  28    1078     229                                                        1206   -2.42    0.10  1.0000
   1   3 -28     800     136                                                         918   -2.42   -0.10  1.0000
   1  -3 -28     840     160                                                         970   -2.16   -0.36  1.0000
   1   3 -28     596     227                                                         697   -2.42   -0.10  1.0000
   1  -3 -28     827     158                                                         956   -2.16   -0.36  1.0000
  -1  -3  27    4178     241                                                        4347    0.98   -0.08  1.0000
   1   3 -27    3562     160                                                        3718    0.98    0.08  1.0000
   1  -3 -27    3702     189                                                        3766    0.52    0.28  1.0000
   1   3 -27    3640     191                                                        3797    0.98    0.08  1.0000
   1  -3 -27    3727     174                                                        3792    0.52    0.28  1.0000
  -1  -3  26     954     188                                                        1366   -4.01   -2.19  1.0000
   1   3 -26     808     133                                                        1196   -4.01    2.19  1.0000
   1  -3 -26     773     157                                                        1152   -3.83   -2.46  1.0000
   1   3 -26     661     221                                                        1016   -4.01    2.19  1.0000
   1  -3 -26     770     165                                                        1148   -3.83   -2.46  1.0000
  -1  -3  25    1656     219                                                        1541   -1.58    1.46  1.0000
   1   3 -25    1268     140                                                        1164   -1.58   -1.46  1.0000
   1  -3 -25    1281     150                                                        1128   -2.19    1.53  1.0000
   1   3 -25    1319     164                                                        1213   -1.58   -1.46  1.0000
   1  -3 -25    1165     140                                                        1019   -2.19    1.53  1.0000
  -1  -3  24     508     187                                                         314    6.34    1.73  1.0000
   1   3 -24     353     120                                                         185    6.34   -1.73  1.0000
   1  -3 -24     361     138                                                         202    6.85    1.42  1.0000
   1   3 -24     185     153                                                          56    6.34   -1.73  1.0000
   1  -3 -24      92     151                                                         -34    6.85    1.42  1.0000
  -1  -3  23     923     167                                                        1129   -3.29    2.40  1.0000
   1   3 -23     837     131                                                        1033   -3.29   -2.40  1.0000
   1  -3 -23     848     157                                                        1127   -2.41    3.35  1.0000
   1   3 -23     895     154                                                        1098   -3.29   -2.40  1.0000
   1  -3 -23     766     141                                                        1032   -2.41    3.35  1.0000
  -1  -3  22     425     180                                                         400   -0.30    0.35  1.0000
   1   3 -22     425     123                                                         400   -0.30   -0.35  1.0000
   1  -3 -22     307     134                                                         282   -0.09    0.57  1.0000
   1   3 -22     499     158                                                         472   -0.30   -0.35  1.0000
   1  -3 -22     536     129                                                         502   -0.09    0.57  1.0000
  -1  -3  21     692     174                                                        1163   -1.29   -5.76  1.0000
   1   3 -21     676     121                                                        1143   -1.29    5.76  1.0000
   1   3 -21     511     134                                                         924   -1.29    5.76  1.0000
   1  -3 -21     564     143                                                        1005   -1.68   -5.69  1.0000
   1   3 -21     475     137                                                         876   -1.29    5.76  1.0000
   1  -3 -21     550     131                                                         986   -1.68   -5.69  1.0000
  -1  -3  20     552     149                                                         578   -5.16    2.85  1.0000
   1   3 -20     695     178                                                         705   -5.16   -2.85  1.0000
  -1   3  20     731     117                                                         702   -4.30   -2.77  1.0000
   1   3 -20     599     118                                                         603   -5.16   -2.85  1.0000
[truncated: 6,551,886 more chars]
